# Supplementary material for: In vitro and in silico studies of SARS-CoV-2 main protease Mpro inhibitors isolated from Helichrysum bracteatum
Source: Royal Society of Chemistry journal article supplement (doi:10.1039/d2ra01213h), 2022-01-01
Supplement: d2ra01213h1.pdf [file d2ra01213h1.pdf]

***In vitro and in silico studies of SARS-CoV-2 main protease M<sup>pro</sup> inhibitors isolated from  
Helichrysum bracteatum***

Gehad Abdel Wahab,<sup>a</sup> Walaa S. Aboelmaaty,<sup>a</sup> Mohamed Farid Lahloub,<sup>a</sup> and Amal Sallam <sup>\*a</sup>

<sup>a</sup>*Pharmacognosy Department, Faculty of Pharmacy, Mansoura University, Mansoura, 35516  
Egypt.*

\*Corresponding author:

Amal Sallam, Department of Pharmacognosy, Faculty of Pharmacy, Mansoura University,  
Mansoura, 35516 Egypt. Tel. +201092017949; fax. +2 050 2247496.

E-mail: [asallam@mans.edu.eg](mailto:asallam@mans.edu.eg)

**Other authors e-mail addresses:**

Gehad Abdel Wahab: e-mail: [gehadabdelwahab@mans.edu.eg](mailto:gehadabdelwahab@mans.edu.eg) or [algehadalhaq@yahoo.com](mailto:algehadalhaq@yahoo.com).

Walaa S. Aboelmaaty: e-mail: [walaa\\_safwat@mans.edu.eg](mailto:walaa_safwat@mans.edu.eg) or [walaa\\_m\\_s@yahoo.com](mailto:walaa_m_s@yahoo.com)

Mohamed Farid Lahloub: e-mail: [mfilah@yahoo.com](mailto:mfilah@yahoo.com).

**ORCID**

Gehad Abdel Wahab: 0000-0001-6424-2445

Walaa S. Aboelmaaty: 0000-0002-7806-7884

Mohamed Farid Lahloub: 0000-0001-6769-3145

Amal Sallam: 0000-0003-3577-2046

***In vitro* and *in silico* studies of SARS-CoV-2 main protease M<sup>pro</sup> inhibitors isolated from  
*Helichrysum bracteatum***

**Abstract**

Discovering SARS-CoV-2 inhibitors from natural sources is still a target that capture the interest of many researchers. In this study, the methanolic extract of *Helichrysum bracteatum* leaves besides compounds (1-18) isolated and identified from it were evaluated *in vitro* for their inhibitory activities against SARS-CoV-2 main protease (M<sup>pro</sup>) using Fluorescence Resonance Energy Transfer assay (FRET-based assay). Based on 1D and 2D spectroscopic techniques, compounds (1-18) were identified as 24- $\beta$ -ethyl-cholesta-5(6),22(23),25(26)-triene-3-ol (1),  $\alpha$ -amyrin (2), linoleic acid (3), 24- $\beta$ -ethyl-cholesta-5(6),22(23),25(26)-triene-3-O- $\beta$ -D-glucoside (4), 1,3-propanediol-2-amino-1-(3',4'-methylenedioxyphenyl)(5), (-)-(7*R*,8*R*,8'*R*)-acuminatolide (6), (+)-piperitol (7), 5,7,4'-trihydroxy-8,3'-dimethoxy flavanone (8), 5,7,4'-trihydroxy-6-methoxy flavanone (9), 4',5-dihydroxy-3',7,8-trimethoxyflavone (10), 5,7-dihydroxy-3',4',5',8-tetramethoxy flavone (11), 1,3-propanediol-2-amino-1-(4'-hydroxy-3'-methoxyphenyl)(12), 3',5',5,7-tetrahydroxy-6-methoxyflavanone (13), simplexoside (piperitol-O- $\beta$ -D-glucoside) (14), pinoresinol monomethyl ether- $\beta$ -D-glucoside (15), orientin (16), luteolin-3'-O- $\beta$ -D-glucoside (17) and 3,5-dicaffeoylquinic acid (18). Compounds 6, 12 and 14 showed comparable inhibitory activities against SARS-COV-2 M<sup>pro</sup> with IC<sub>50</sub> values of 0.917 $\pm$ 0.05, 0.476 $\pm$ 0.02 and 0.610 $\pm$ 0.03 $\mu$ M, respectively compared with the control lopinavir with an IC<sub>50</sub> value of 0.225 $\pm$ 0.01  $\mu$ M. The other tested compounds showed considerable inhibitory activities. Molecular docking study for the tested compounds was carried out to correlate their binding modes and affinities for SARS-COV-2 M<sup>pro</sup>enzyme with the *in vitro* results. Analyzing the results of the *in vitro* assay together with the obtained *in silico* results led to the conclusion that the phenylpropanoids, lignans and flavonoids could be considered suitable drug leads for developing anti-COVID-19 therapeutics. Moreover, the phenylpropanoid skeleton oxygenated at C3, C4 of the phenyl moiety and at C1, C3 of the propane part constitute an essential core of the SARS-COV-2 M<sup>pro</sup> inhibitors, thus could be proposed as scaffold for the design of new anti-COVID-19 drugs.

**Key words:** *Helichrysum bracteatum*, FRET-based assay, SARS-COV-2 M<sup>pro</sup> inhibitors, Molecular docking, anti-COVID-19.

## Content

| <u>Figures</u>                                                                                                         | <u>Page:</u> |
|------------------------------------------------------------------------------------------------------------------------|--------------|
| <b>Figure S1:</b> $^1\text{H}$ NMR spectrum of compound 1 in $\text{CDCl}_3$                                           | 5            |
| <b>Figure S2:</b> DEPT Q spectrum of compound 1 in $\text{CDCl}_3$                                                     | 5            |
| <b>Figure S3:</b> $^1\text{H}$ NMR spectrum of compound 2 in $\text{CDCl}_3$                                           | 6            |
| <b>Figure S4:</b> APT spectrum of compound 2 in $\text{CDCl}_3$                                                        | 6            |
| <b>Figure S5:</b> $^1\text{H}$ NMR spectrum of compound 3 in $\text{CDCl}_3$                                           | 7            |
| <b>Figure S6:</b> APT spectrum of compound 3 in $\text{CDCl}_3$                                                        | 7            |
| <b>Figure S7:</b> $^1\text{H}$ NMR spectrum of compound 4 in $\text{DMSO}-d_6$                                         | 8            |
| <b>Figure S8:</b> APT spectrum of compound 4 in $\text{DMSO}-d_6$                                                      | 8            |
| <b>Figure S9:</b> $^1\text{H}$ NMR spectrum of compound 5 in $\text{CDCl}_3$                                           | 9            |
| <b>Figure S10:</b> APT spectrum of compound 5 in $\text{CDCl}_3$                                                       | 9            |
| <b>Figure S11:</b> HMBC correlations of compound 5                                                                     | 10           |
| <b>Figure S12:</b> $^1\text{H}$ NMR spectrum of compound 6 in $\text{CDCl}_3$                                          | 11           |
| <b>Figure S13:</b> APT spectrum of compound 6 in $\text{CDCl}_3$                                                       | 11           |
| <b>Figure S14:</b> $^1\text{H}$ NMR spectrum of compound 7 in $\text{CDCl}_3$                                          | 12           |
| <b>Figure S15:</b> APT spectrum of compound 7 in $\text{CDCl}_3$                                                       | 12           |
| <b>Figure S16:</b> $^1\text{H}$ NMR spectrum of compound 8 in $\text{CD}_3\text{OD}$                                   | 13           |
| <b>Figure S17:</b> APT spectrum of compound 8 in $\text{CD}_3\text{OD}$                                                | 13           |
| <b>Figure S18:</b> HMBC spectrum of compound 8                                                                         | 14           |
| <b>Figure S19:</b> $^1\text{H}$ NMR spectrum of compound 9 in $\text{CD}_3\text{OD}$                                   | 15           |
| <b>Figure S20:</b> APT spectrum of compound 9 in $\text{CD}_3\text{OD}$                                                | 15           |
| <b>Figure S21:</b> $^1\text{H}$ NMR spectrum of compound 10 in $\text{DMSO}-d_6$                                       | 16           |
| <b>Figure S22:</b> DEPT-Q spectrum of compound 10 in $\text{DMSO}-d_6$                                                 | 16           |
| <b>Figure S23:</b> HMBC spectrum of compound 10                                                                        | 17           |
| <b>Figure S24:</b> $^1\text{H}$ NMR spectrum of compound 11 in $\text{CDCl}_3$                                         | 18           |
| <b>Figure S25:</b> APT spectrum of compound 11 in $\text{CDCl}_3$                                                      | 18           |
| <b>Figure S26:</b> $^1\text{H}$ NMR spectrum of compound 12 in $\text{CDCl}_3$                                         | 19           |
| <b>Figure S27:</b> APT spectrum of compound 12 in $\text{CDCl}_3$                                                      | 19           |
| <b>Figure S28:</b> $^1\text{H}$ NMR spectrum of compound 13 in $\text{CD}_3\text{OD}$                                  | 20           |
| <b>Figure 29:</b> $^1\text{H}$ -NMR spectrum of compound 13 (expansion at $\delta$ (2.5-6.8 ppm))                      | 21           |
| <b>Figure S30:</b> $^1\text{H}$ -NMR spectrum of compound 13 (expansion at $\delta$ (6.60-6.95 ppm))                   | 22           |
| <b>Figure S31:</b> APT spectrum of compound 13 in $\text{CD}_3\text{OD}$                                               | 23           |
| <b>Figure S32:</b> HSQC spectrum of compound 13                                                                        | 24           |
| <b>Figure S33:</b> HSQC expansion spectrum of compound 13                                                              | 25           |
| <b>Figure S34:</b> HMBC spectrum of compound 13                                                                        | 26           |
| <b>Figure S35:</b> HMBC expansion spectrum of compound 13                                                              | 27           |
| <b>Figure S36:</b> LC-MS ( $^+$ ESI) spectrum of compound 13                                                           | 28           |
| <b>Figure S37A:</b> Proposed fragmentation pattern for compound 13 according to HR-ESI $^+$ -MS positive mode spectrum | 29           |
| <b>Figure S37B:</b> LC-MS ( $^+$ ESI) fragmentation of compound 13                                                     | 29           |
| <b>Figure S38:</b> Structural differences between compounds 8, 9 & 13                                                  | 30           |
| <b>Figure S39:</b> Selected HMBC correlations of compound 13                                                           | 30           |
| <b>Figure S40:</b> $^1\text{H}$ NMR spectrum of compound 14 in $\text{DMSO}-d_6$                                       | 31           |
| <b>Figure S41:</b> APT spectrum of compound 14 in $\text{DMSO}-d_6$                                                    | 31           |
| <b>Figure S42:</b> $^1\text{H}$ NMR spectrum of compound 15 in $\text{CD}_3\text{OD}$                                  | 32           |

|                                                                                                                                                                                   |    |
|-----------------------------------------------------------------------------------------------------------------------------------------------------------------------------------|----|
| <b>Figure S43:</b> APT spectrum of compound 15 in CD <sub>3</sub> OD                                                                                                              | 32 |
| <b>Figure S44:</b> <sup>1</sup> H NMR spectrum of compound 16 in DMSO- <i>d</i> <sub>6</sub>                                                                                      | 33 |
| <b>Figure S45:</b> APT spectrum of compound 16 in DMSO- <i>d</i> <sub>6</sub>                                                                                                     | 33 |
| <b>Figure S46:</b> <sup>1</sup> H NMR spectrum of compound 17 in CD <sub>3</sub> OD                                                                                               | 34 |
| <b>Figure S47:</b> APT spectrum of compound 17 in CD <sub>3</sub> OD                                                                                                              | 34 |
| <b>Figure S48:</b> HMBC spectrum of compound 17                                                                                                                                   | 35 |
| <b>Figure S49:</b> <sup>1</sup> H NMR spectrum of compound 18 in CD <sub>3</sub> OD                                                                                               | 36 |
| <b>Figure S50:</b> APT spectrum of compound 18 in CD <sub>3</sub> OD                                                                                                              | 36 |
| <b>Figure S51:</b> SAR of compound 12 versus compound 5                                                                                                                           | 37 |
| <b>Figure S52:</b> SAR of compound 1 versus compound 4                                                                                                                            | 37 |
| <b>Figure S53:</b> SAR of compound 14 versus compound 7                                                                                                                           | 38 |
| <b>Figure S54:</b> SAR of compound 14 versus compound 15                                                                                                                          | 38 |
| <b>Figure S55:</b> The SARS-COV-2 M <sup>pro</sup> inhibition (IC <sub>50</sub> μg/ml) of methanolic extract, fractions and the isolated compounds against the standard lopinavir | 39 |

| <b>Tables</b>                                                                                                                                                                                                                                                                            | <b>Page:</b> |
|------------------------------------------------------------------------------------------------------------------------------------------------------------------------------------------------------------------------------------------------------------------------------------------|--------------|
| <b>Table S1:</b> UV λ <sub>max</sub> (nm) of compounds 8, 9, 13, 10, 11, 16 & 17 in methanol and in different flavonoids shift reagents                                                                                                                                                  | 40           |
| <b>Table S2:</b> <sup>1</sup> H-NMR and APT values of compound 8, 9 and 13 in CD <sub>3</sub> OD                                                                                                                                                                                         | 41           |
| <b>Table S3:</b> Key HMBC correlations of compound 13                                                                                                                                                                                                                                    | 42           |
| <b>Table S4:</b> Results of the SARS-COV-2 M <sup>pro</sup> inhibitory activity of the methanolic extract of the leaves of <i>H. bracteatum</i> and its fractions compared with the standard lopinavir                                                                                   | 42           |
| <b>Table S5:</b> The SARS-COV-2 M <sup>pro</sup> inhibition (IC <sub>50</sub> μM), docking scores <sup>a</sup> and type of binding interactions of the isolated compounds (1-18) and the standard compound (lopinavir)                                                                   | 43           |
| <b>Table S6:</b> 2D binding mode and residues involved in the recognition of the standard lopinavir and the isolated compounds docked and minimized in the SARS-COV-2 M <sup>pro</sup> binding pocket                                                                                    | 45           |
| <b>Table S7:</b> A) 3D binding mode and residues involved in the recognition the standard lopinavir and the isolated compounds docked and minimized in the SARS-COV-2 M <sup>pro</sup> binding pocket<br>B) Surface and maps of the isolated compound compared to the standard lopinavir | 52           |
| <b>Data S1:</b> Proton and carbon values of the isolated compound [1-18]                                                                                                                                                                                                                 | 59           |

# Compound 1

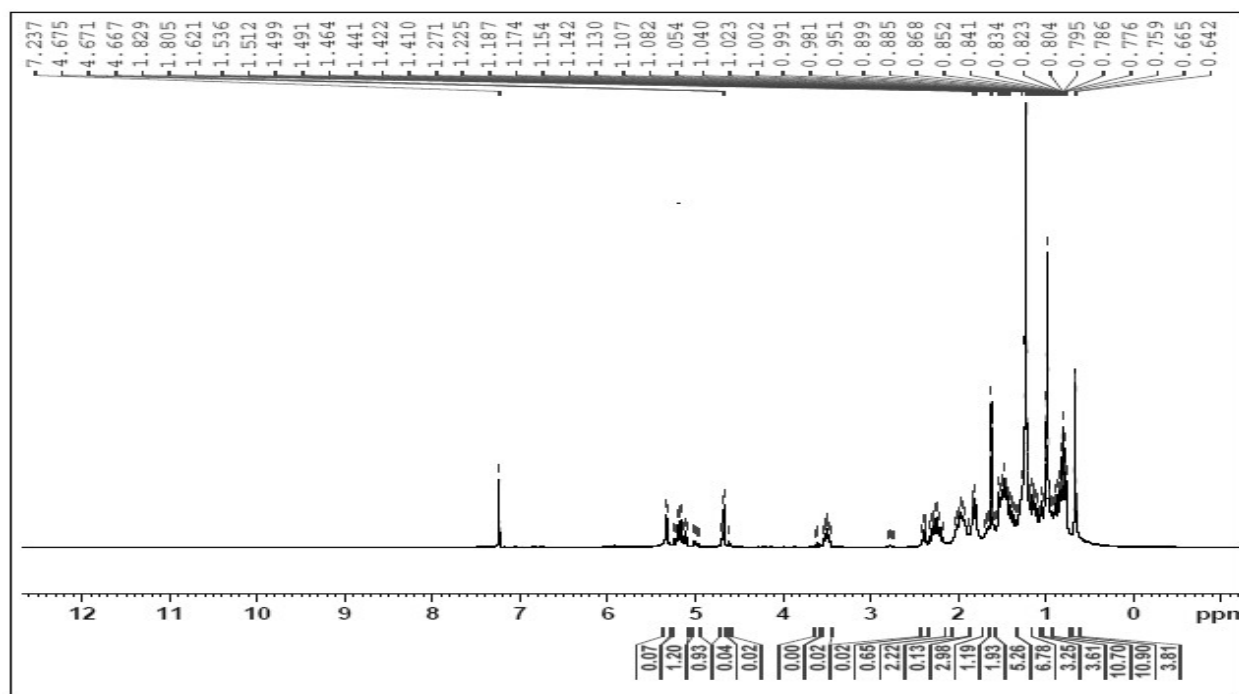

Figure S1: <sup>1</sup>H NMR spectrum

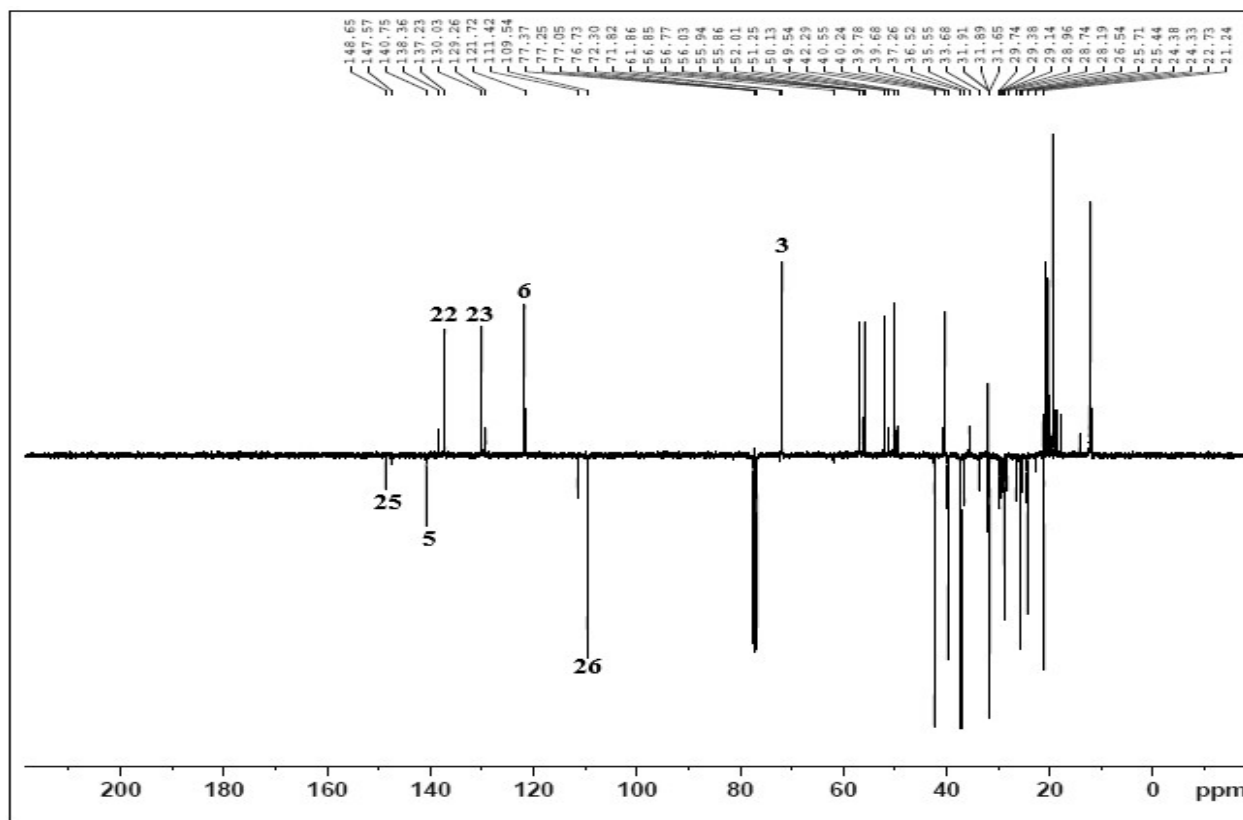

Figure S2: <sup>13</sup>C NMR spectrum of compound 1 in CDCl<sub>3</sub>

## Compound 2

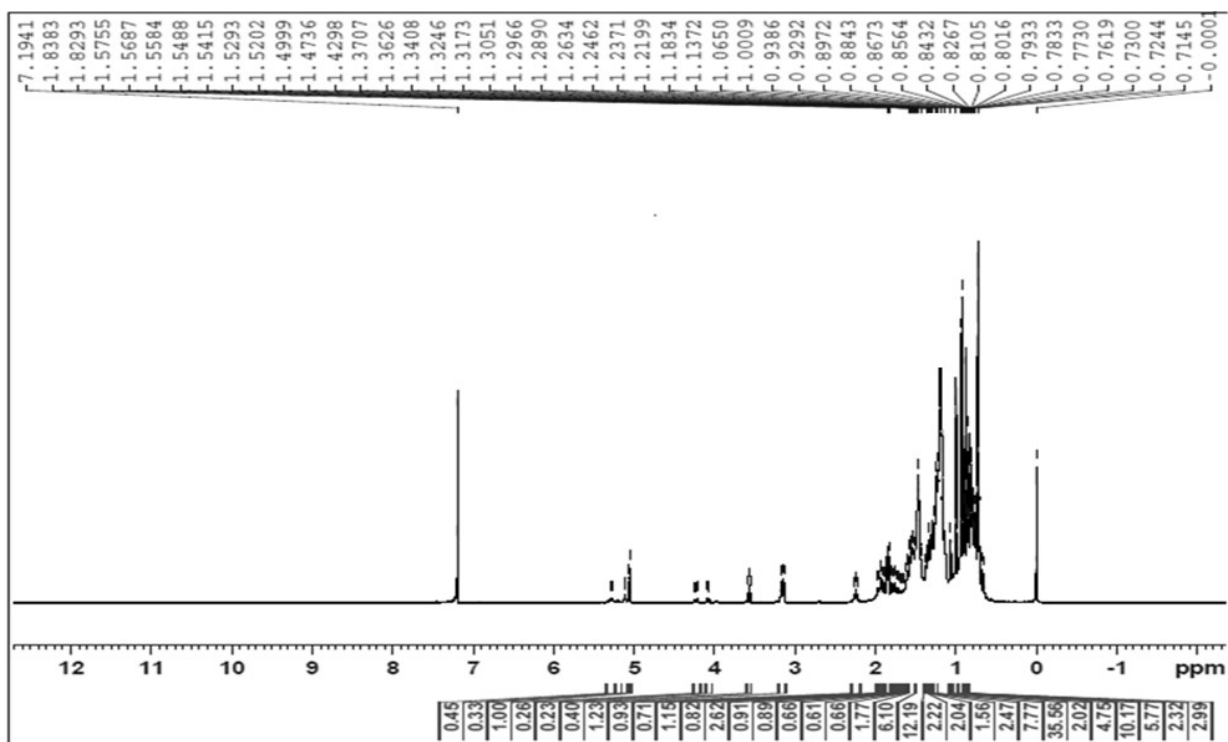

Figure S3: <sup>1</sup>H NMR spectrum of compound 2 in CDCl<sub>3</sub>

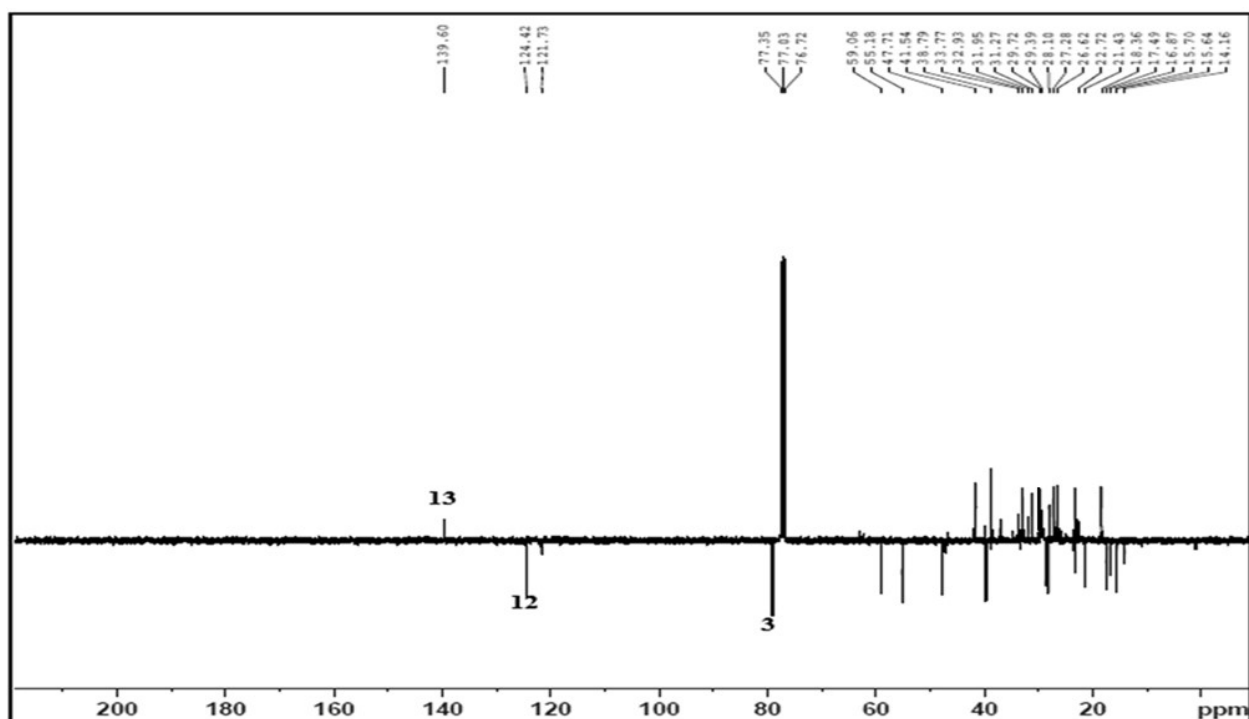

Figure S4: APT spectrum of compound 2 in CDCl<sub>3</sub>

# Compound 3

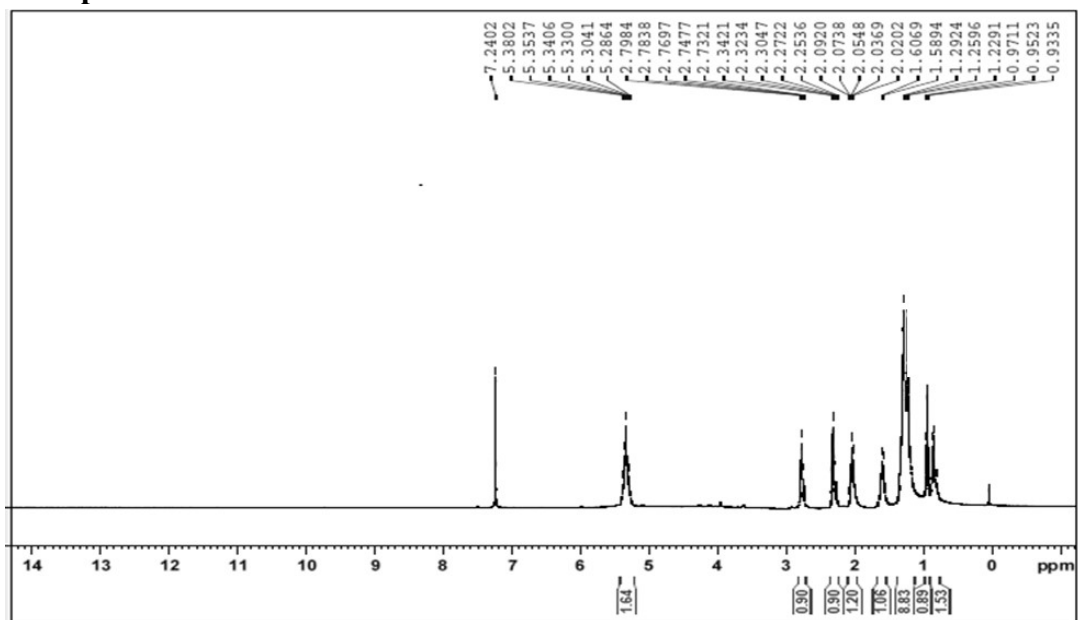

Figure S5: <sup>1</sup>H NMR spectrum of compound 3

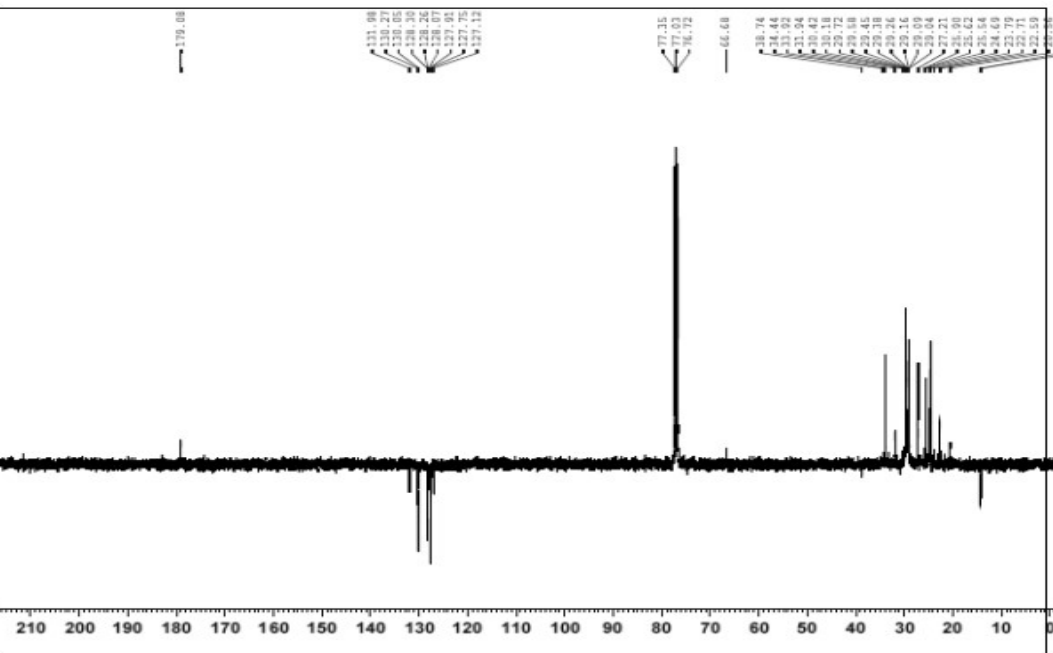

Figure S6: APT spectrum of compound 3 in  $\text{CDCl}_3$

Compound 4

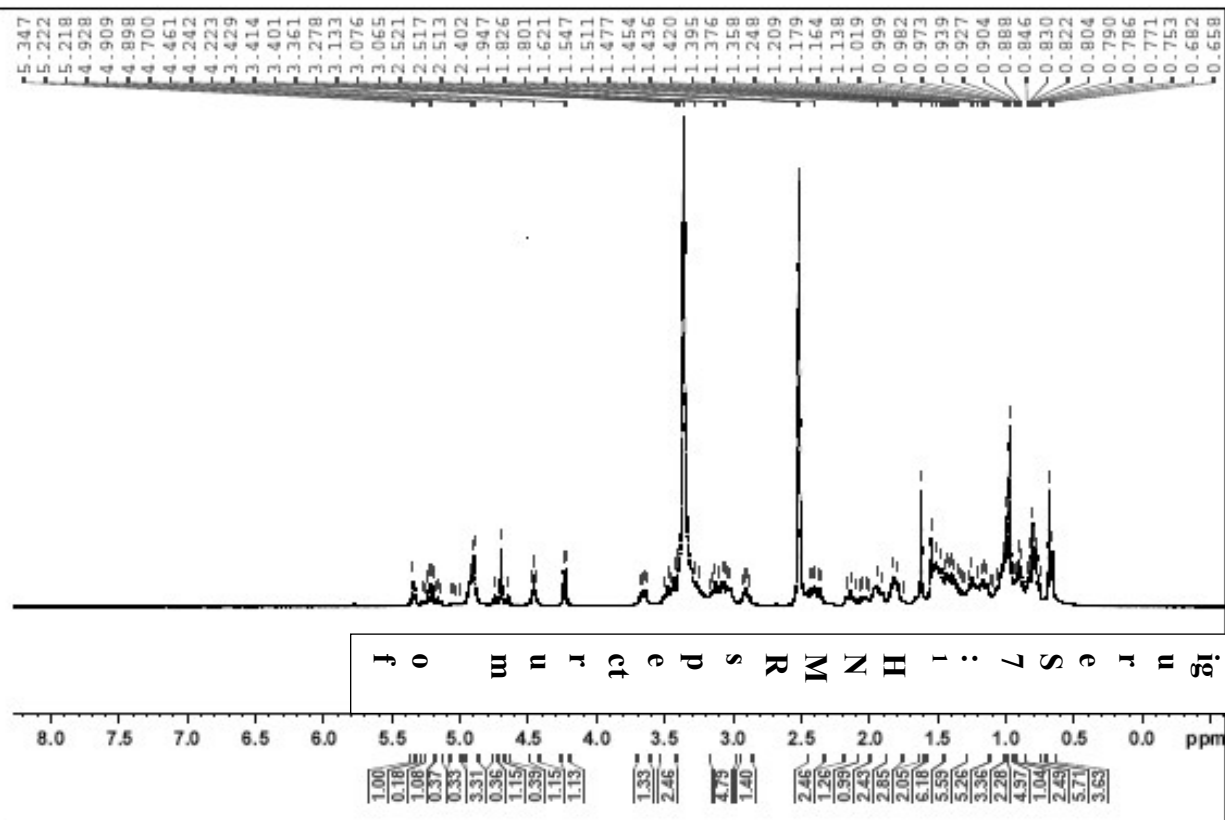

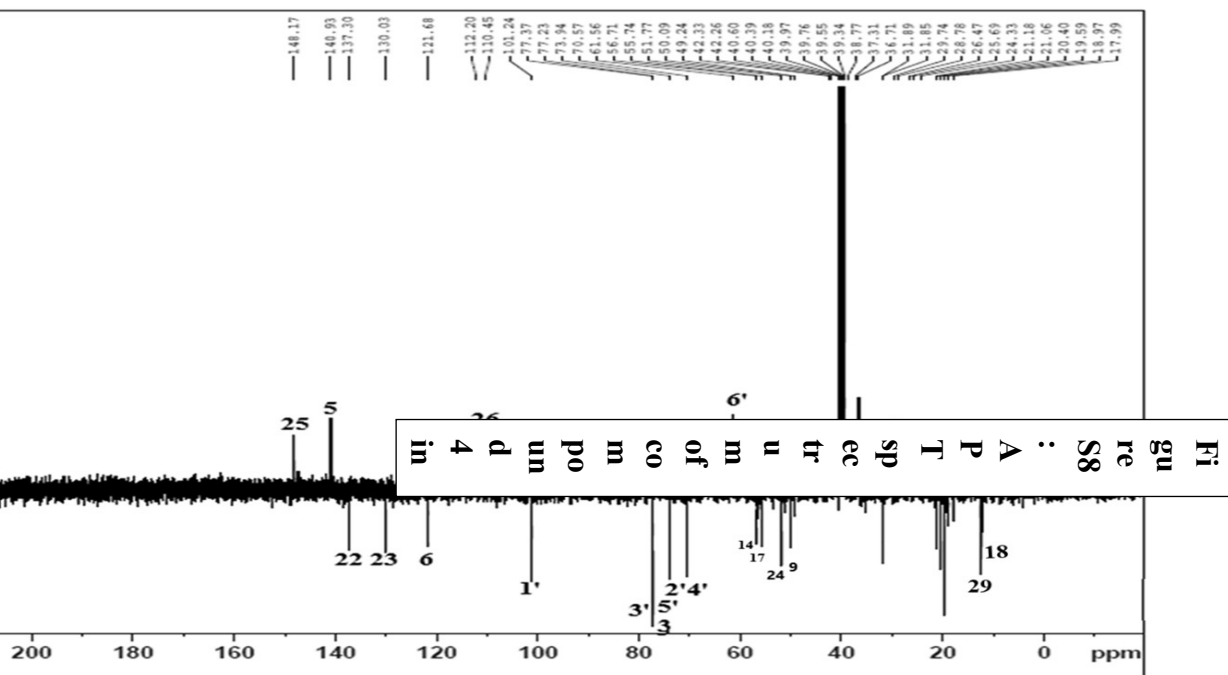

Compound 5

Figure S1: AP T spectrum of compound 5 in CDCl<sub>3</sub>

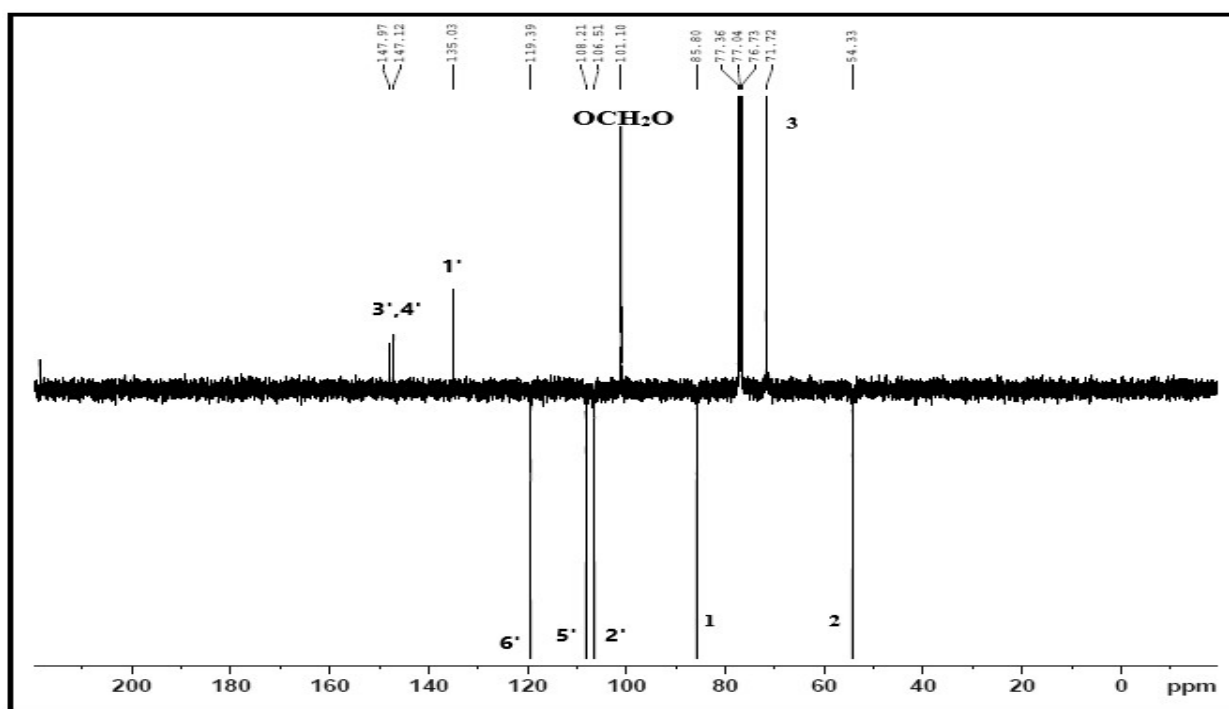

Figure S9: <sup>1</sup>H NMR spectrum of compound 5 in CDCl<sub>3</sub>

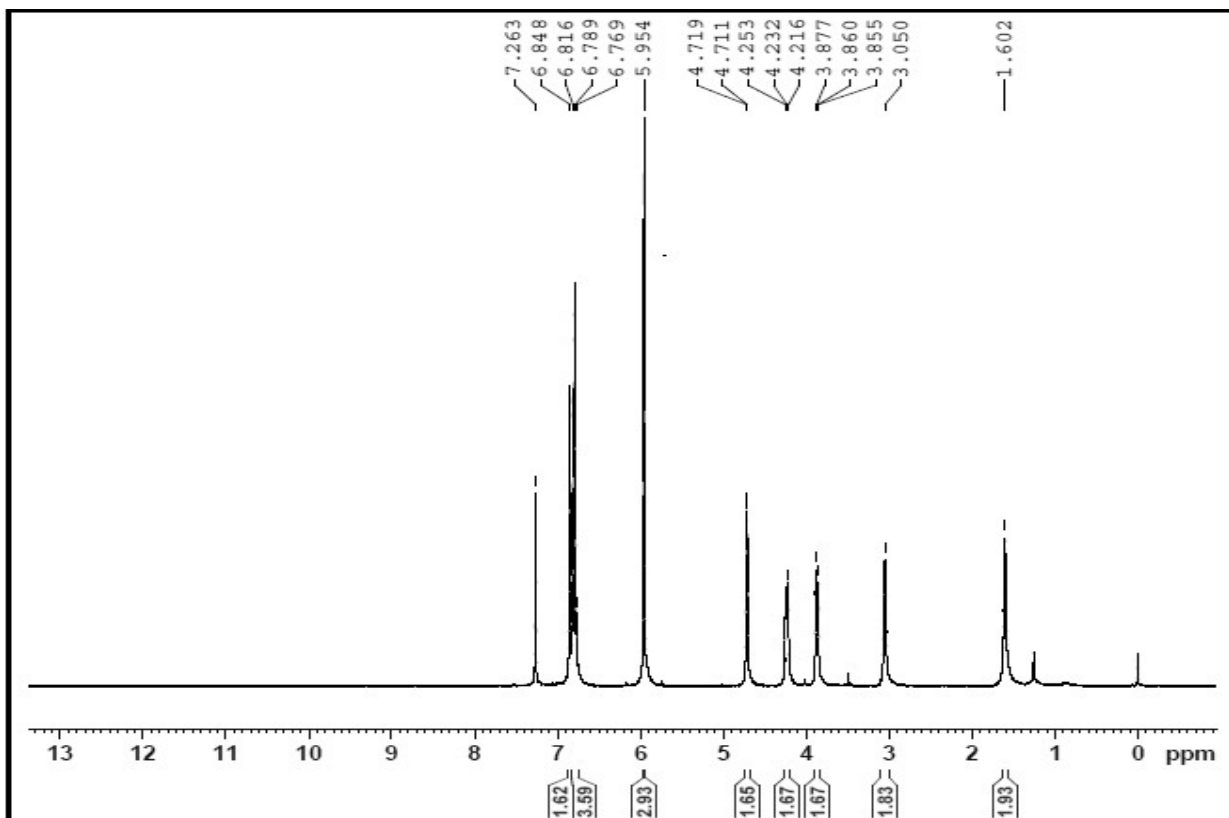

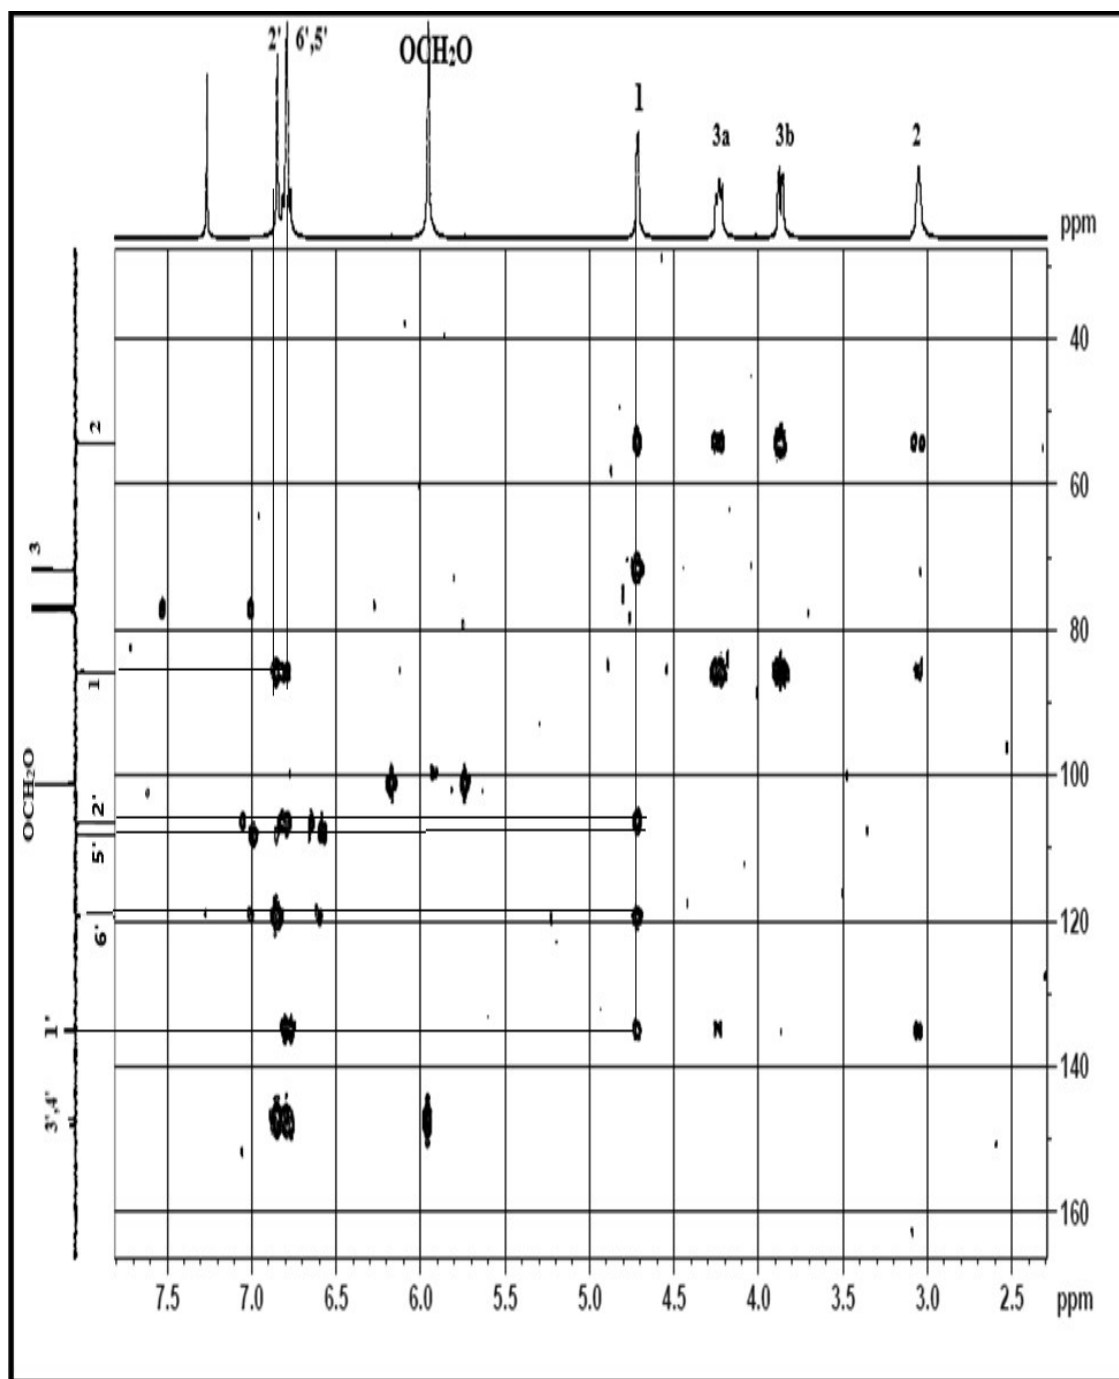

Figure S11: HMBC correlations of compound 5 in  $\text{CDCl}_3$

# Compound 6

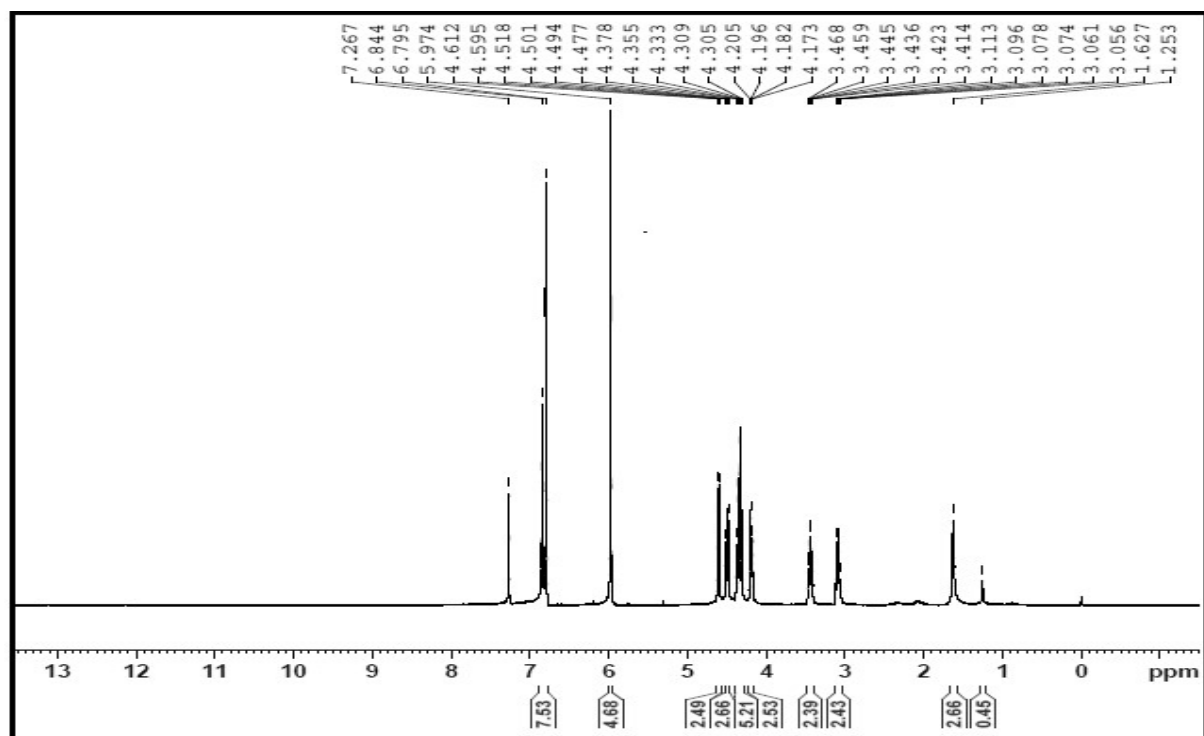

Figure S12: <sup>1</sup>H NMR spectrum of compound 6

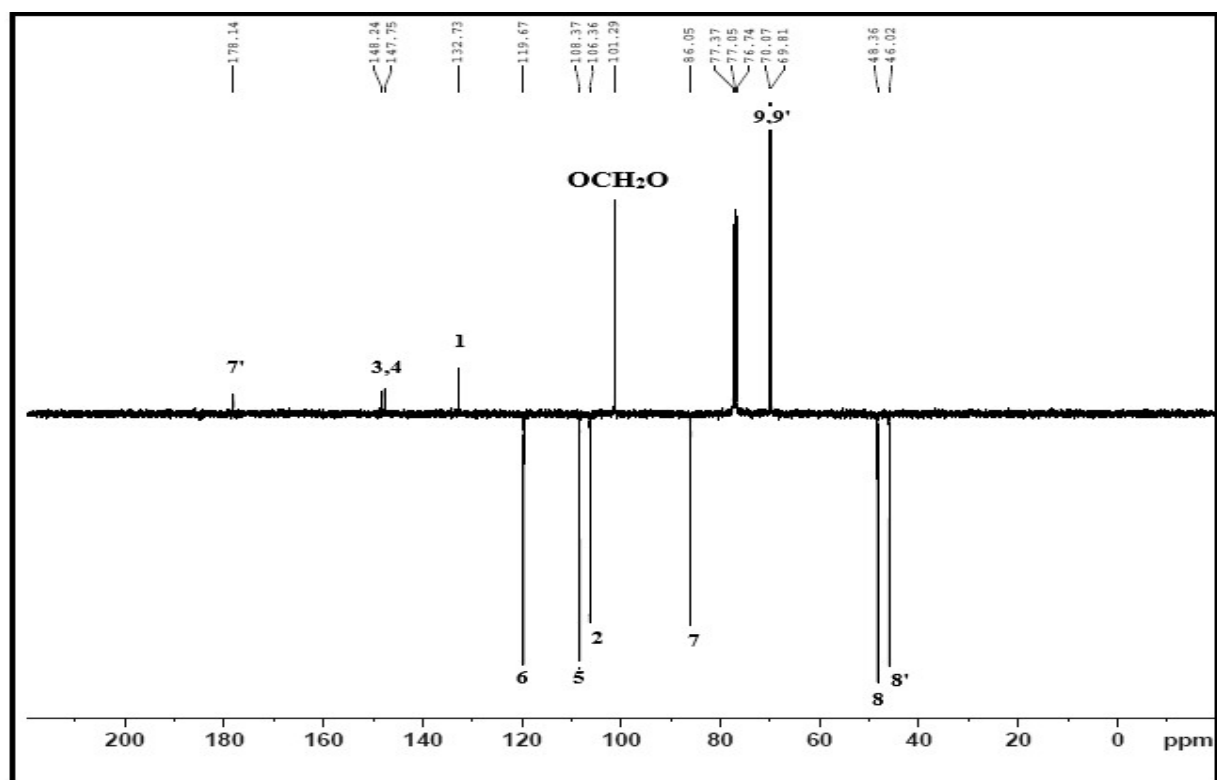

Figure S13: <sup>13</sup>C NMR spectrum of compound 6

# Compound 7

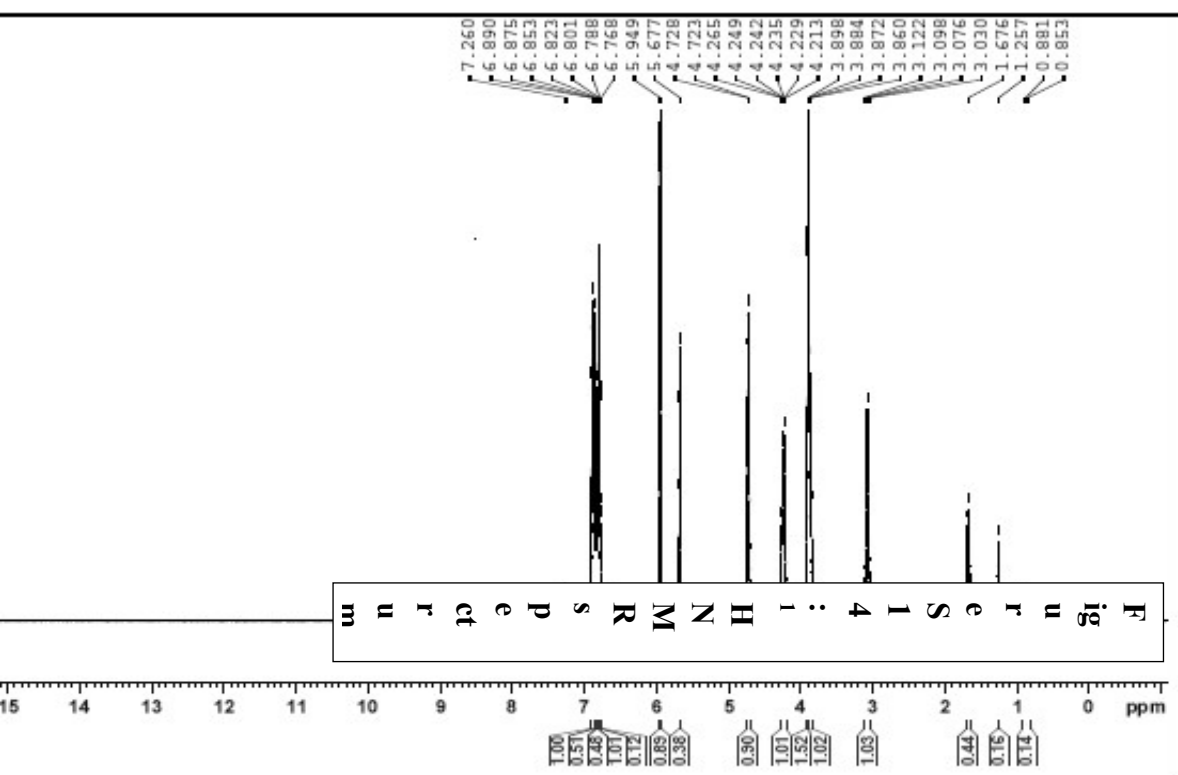

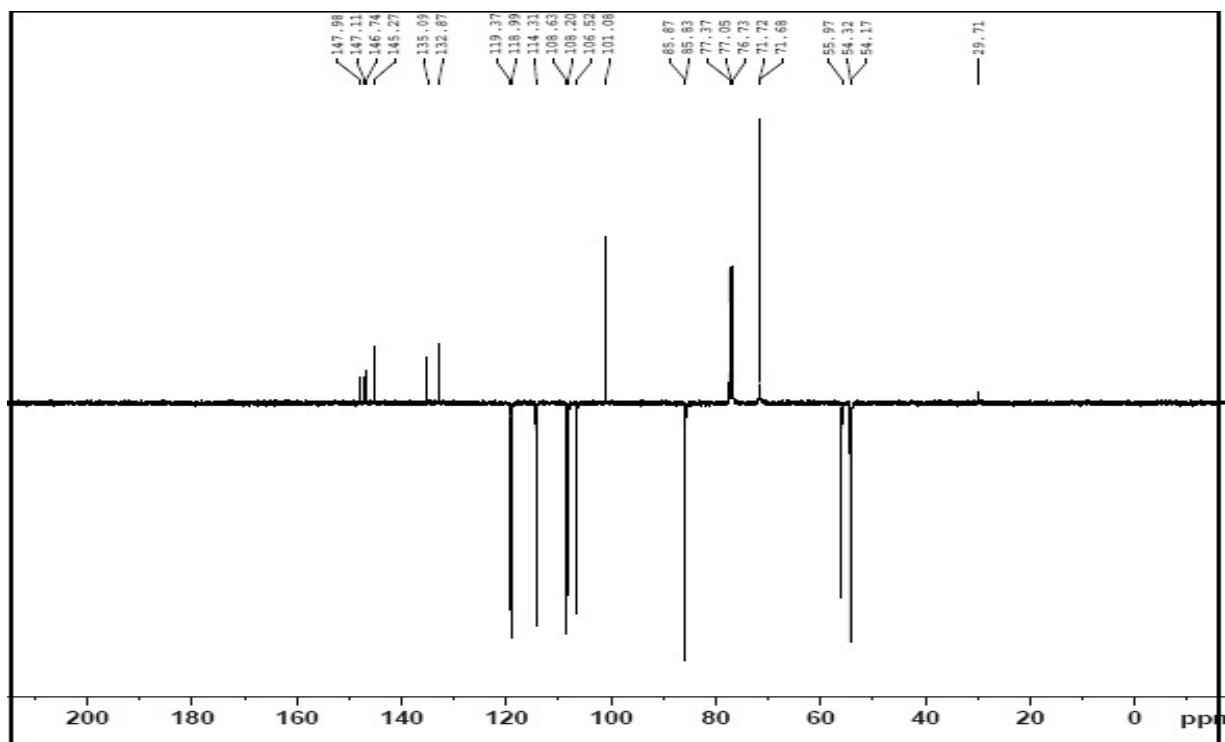

Compound 8

Figure S1: <sup>13</sup>C NMR spectrum of compound 7 in CDCl<sub>3</sub>

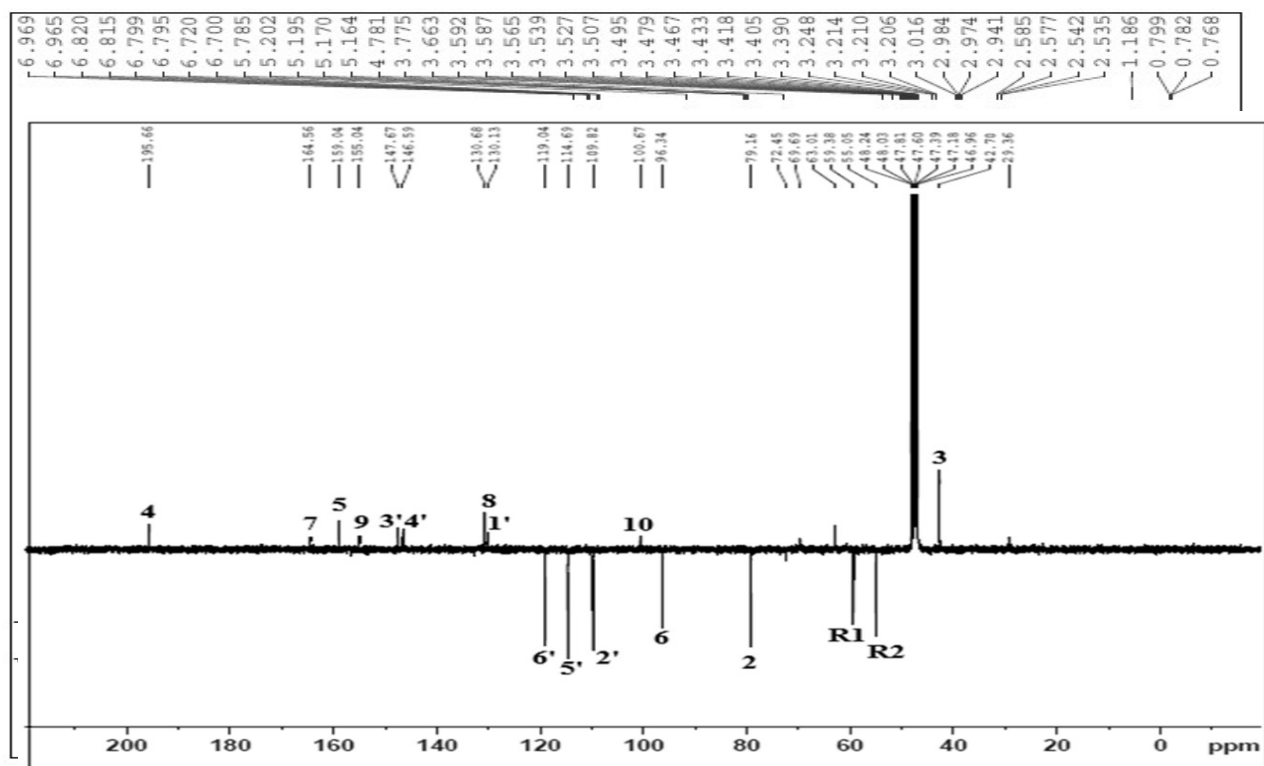

Figure S1: <sup>13</sup>C NMR spectrum of compound 7 in CDCl<sub>3</sub>

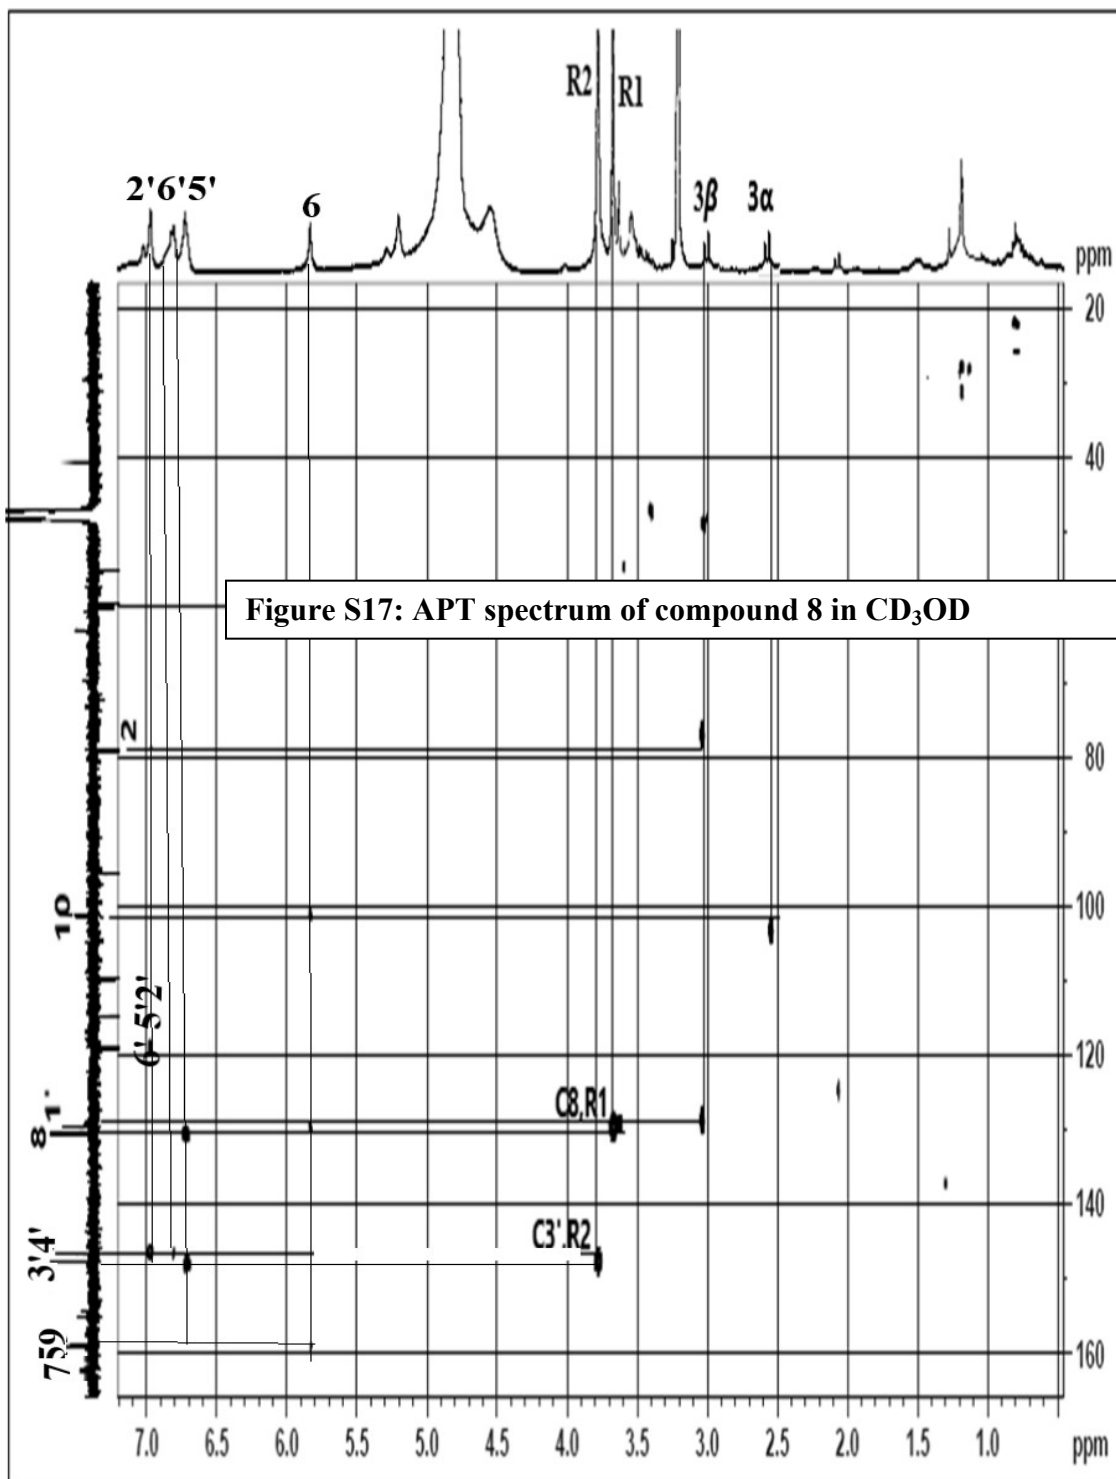

Figure S18: HMBC spectrum of compound HM 8

# Compound 9

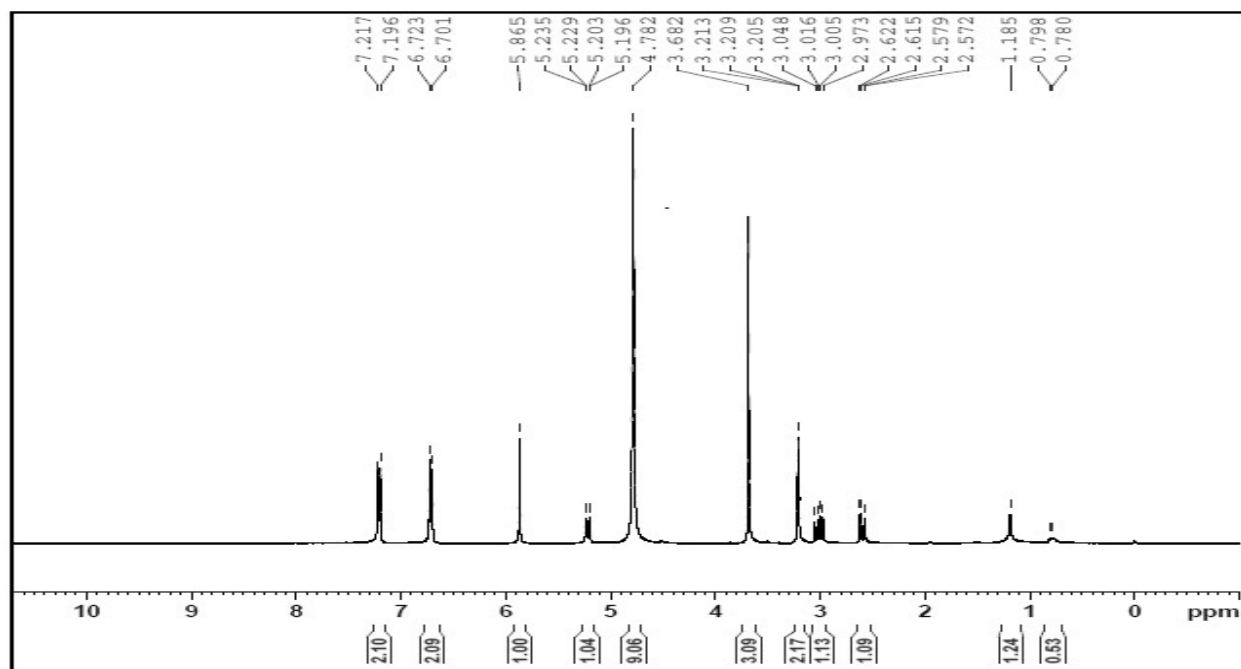

Figure S19: <sup>1</sup>H NMR spectrum of Compound 9

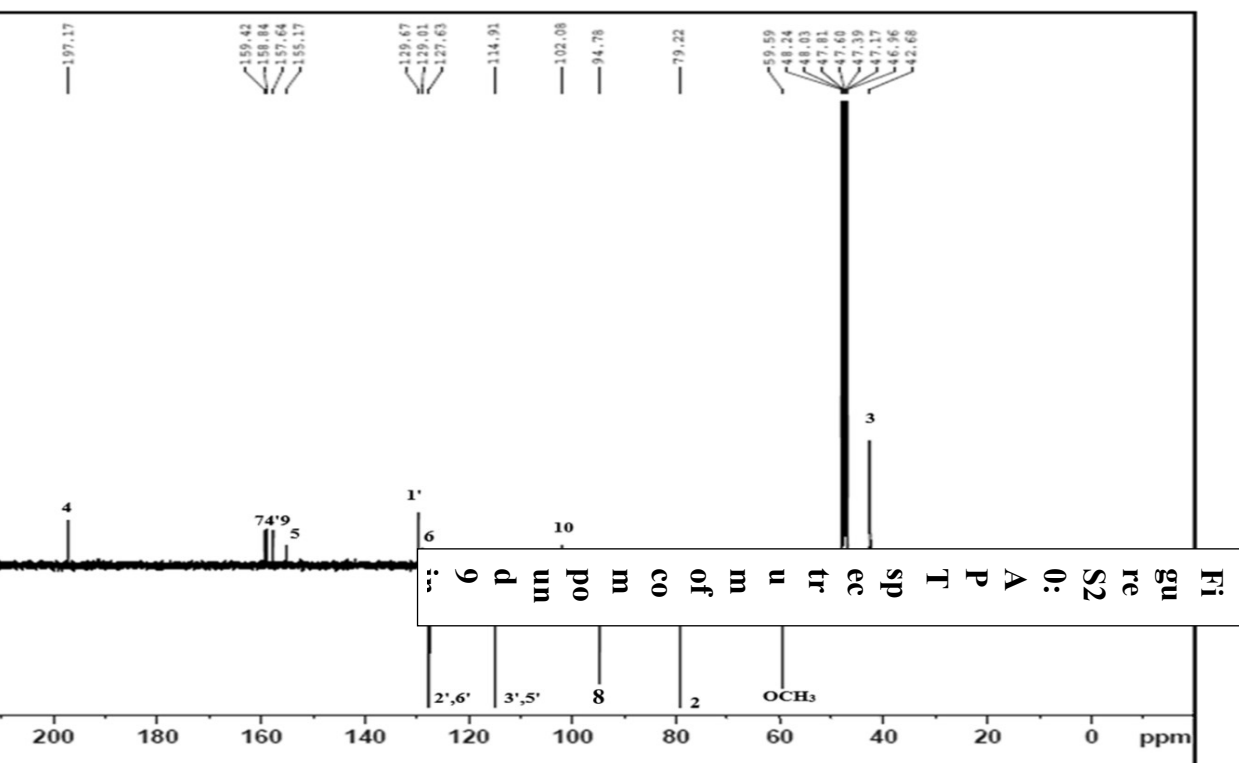

Compound 10

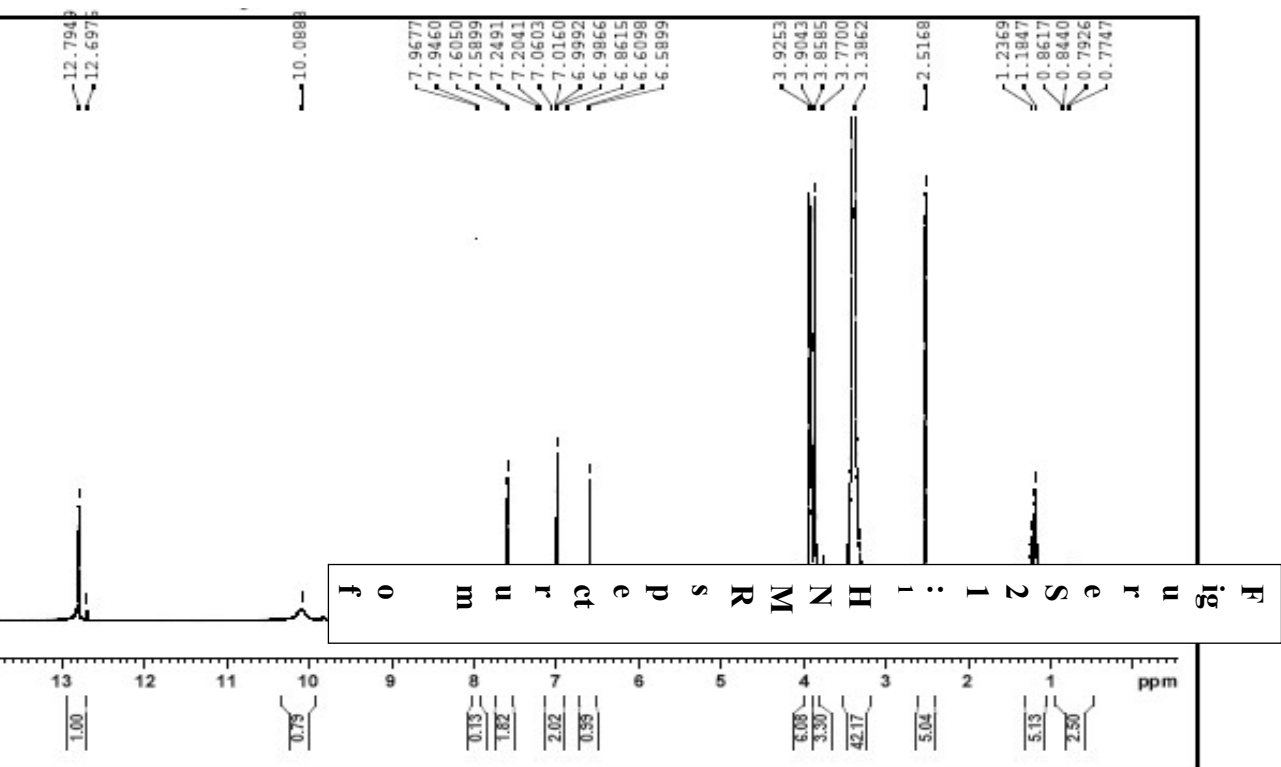

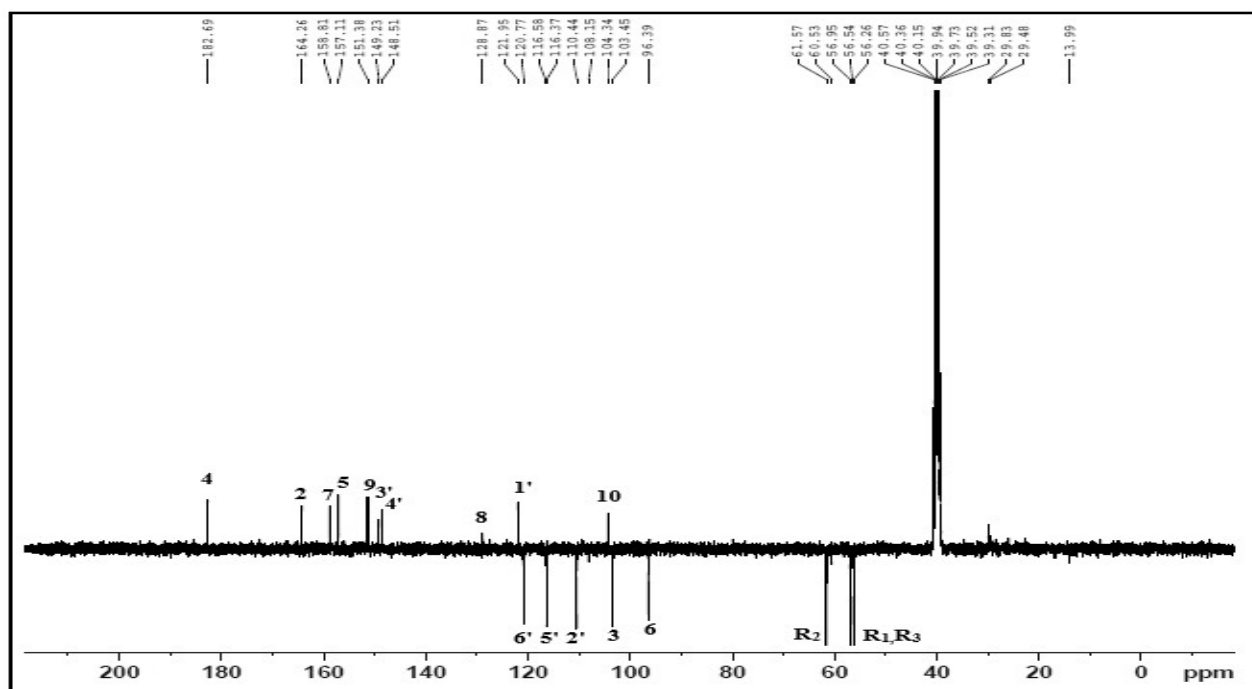

Figure S22 : DEPT Q spectrum of compound 10 in DMSO-*d*<sub>6</sub>

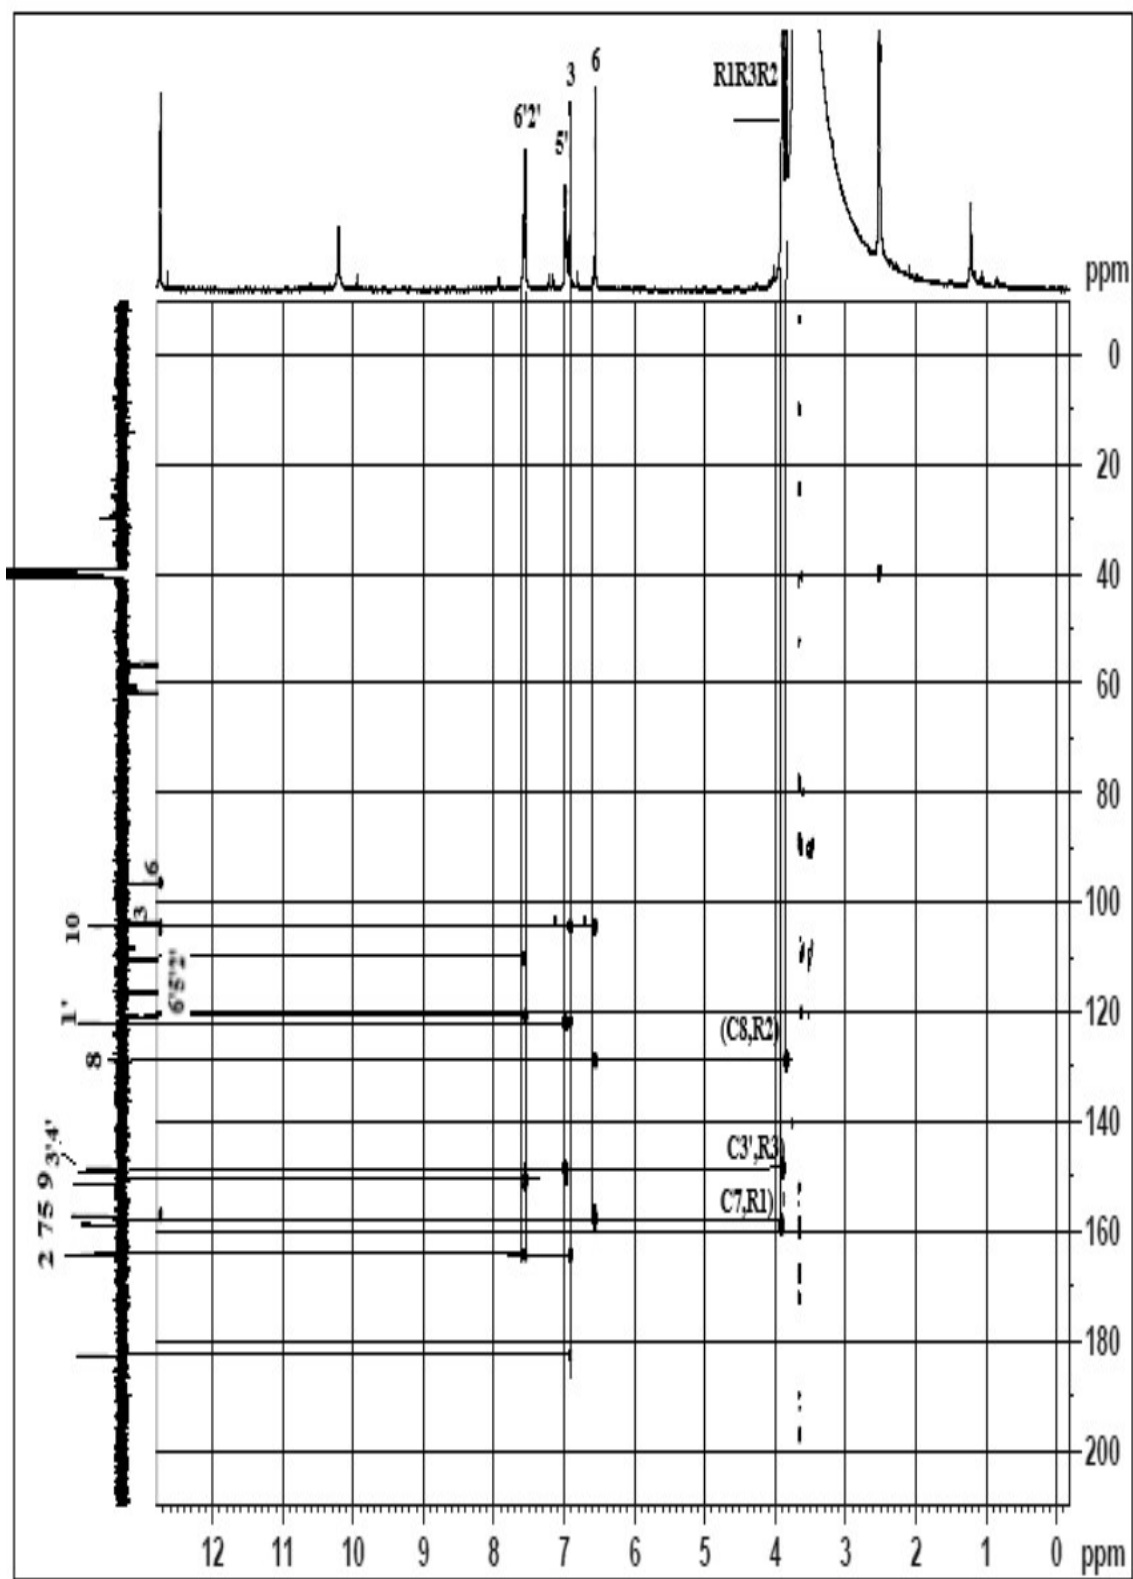

Figure S23: HMBC spectrum of compound 10

# Compound 11

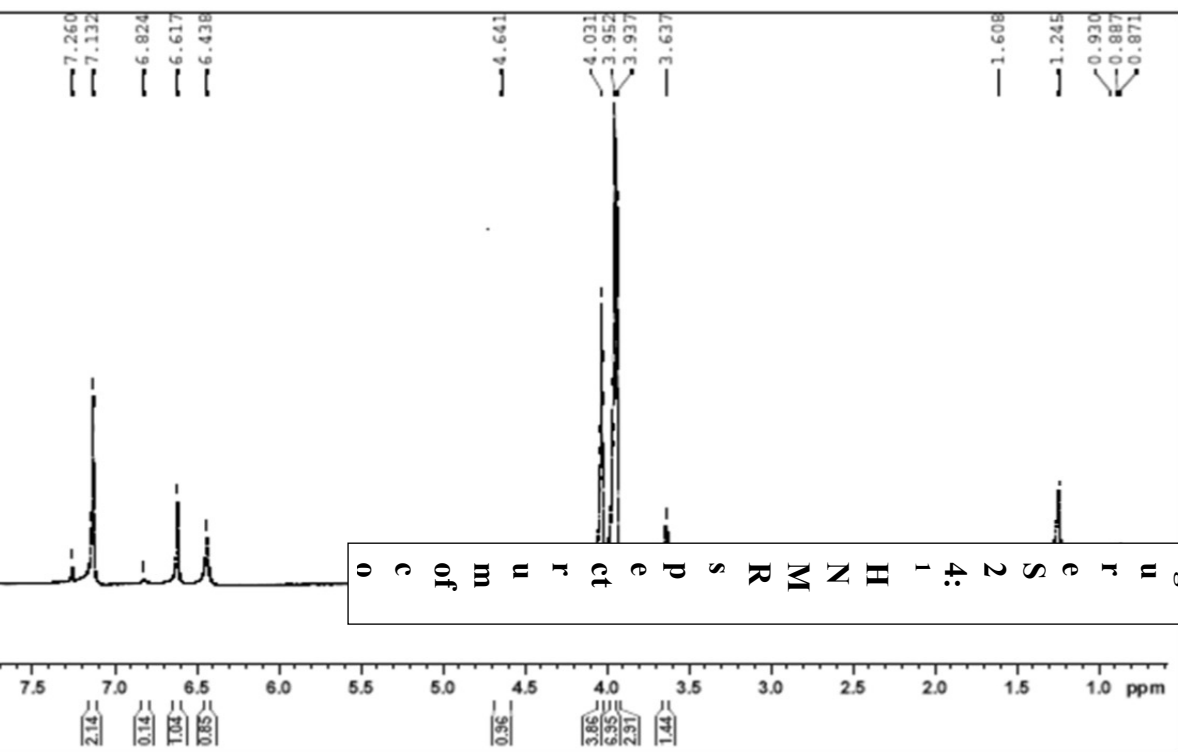

Figure S2: <sup>1</sup>H NMR spectrum of compound 11

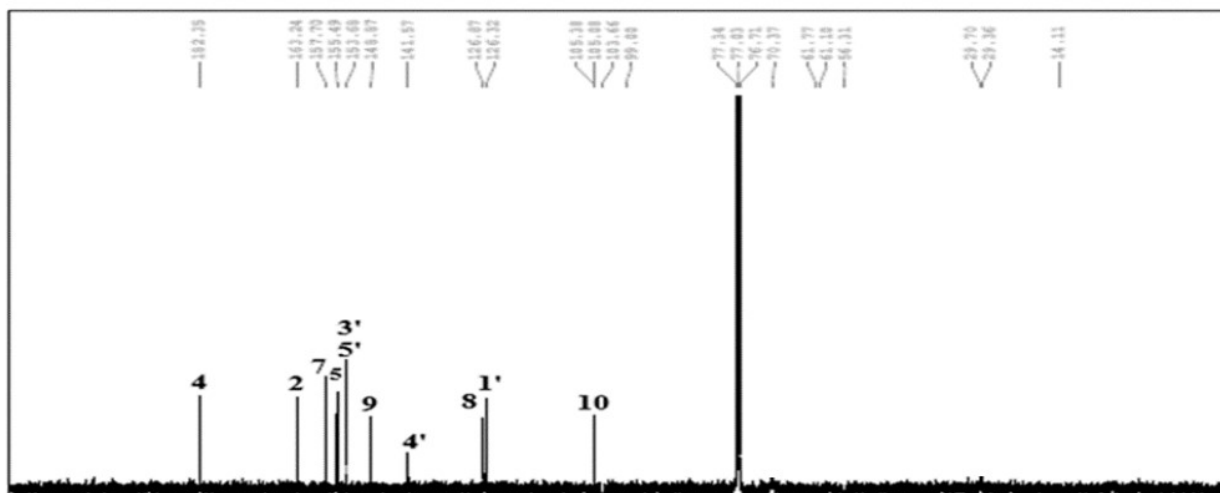

Compound 12

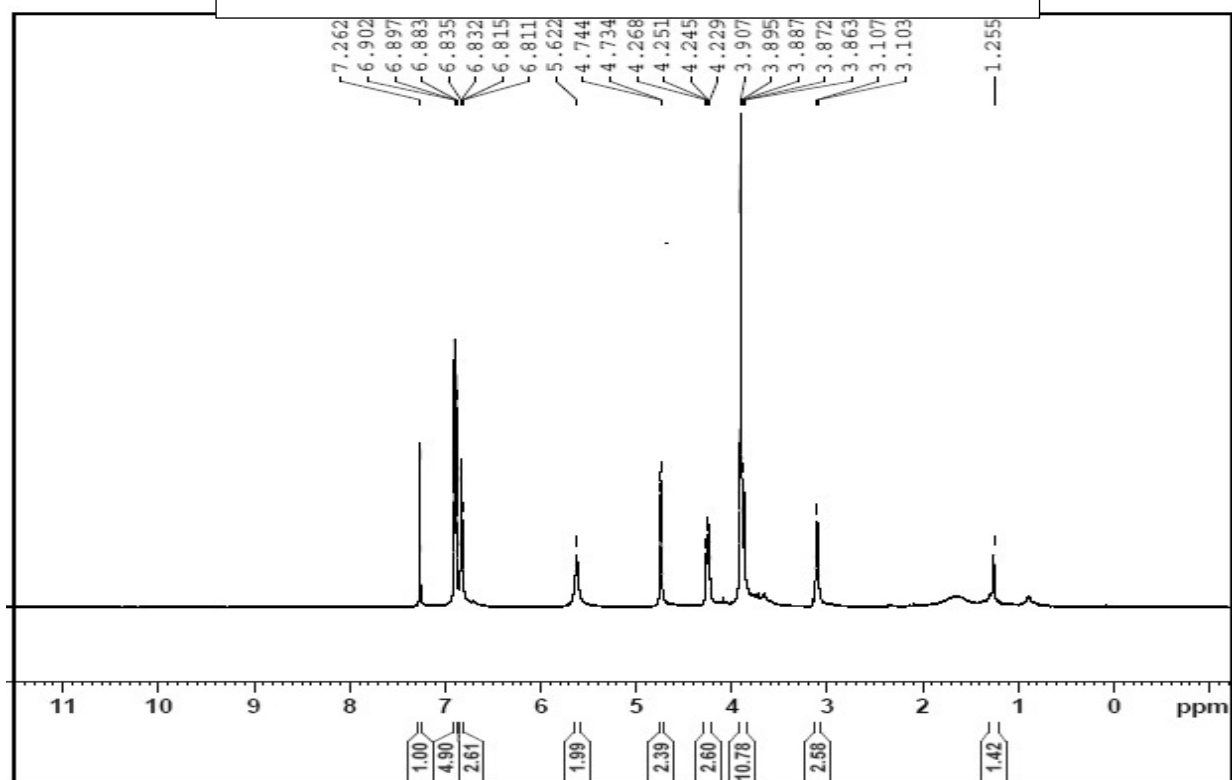Figure S2: <sup>1</sup>H NMR spectrum of compound 12

Figure S2.7: A PT spectrum of compound 12 in  $C_n$

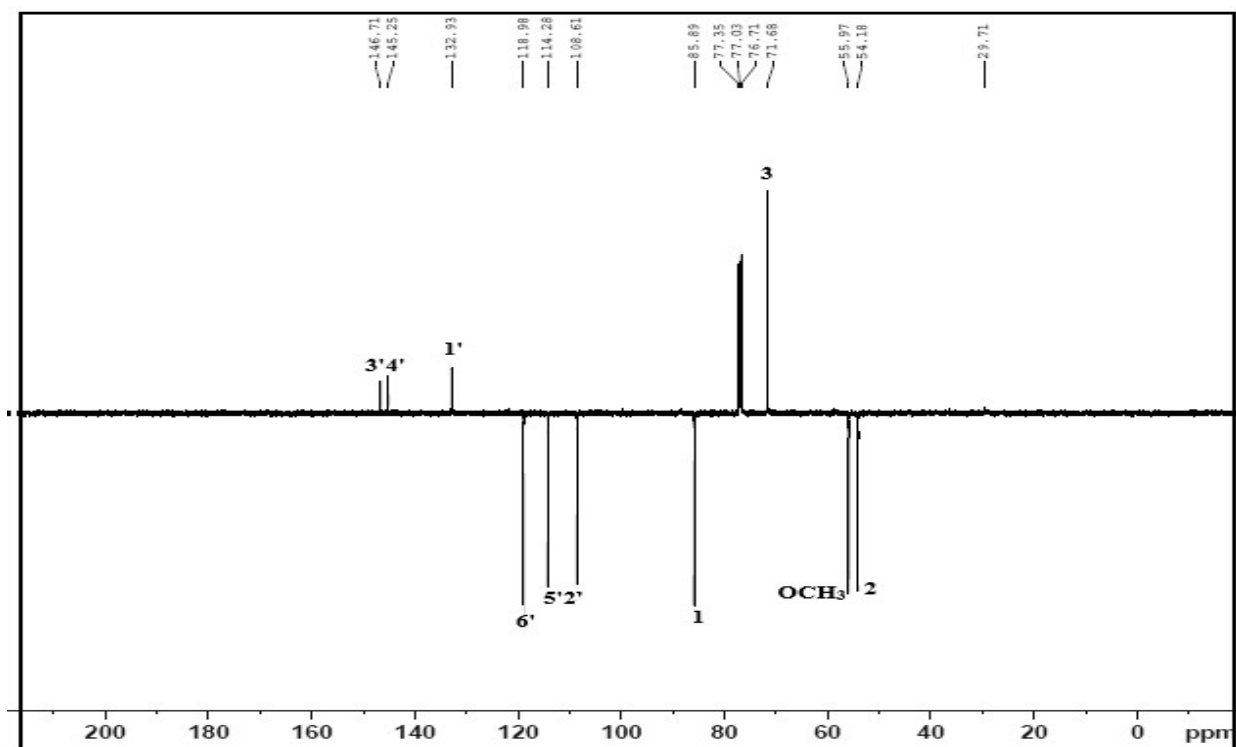

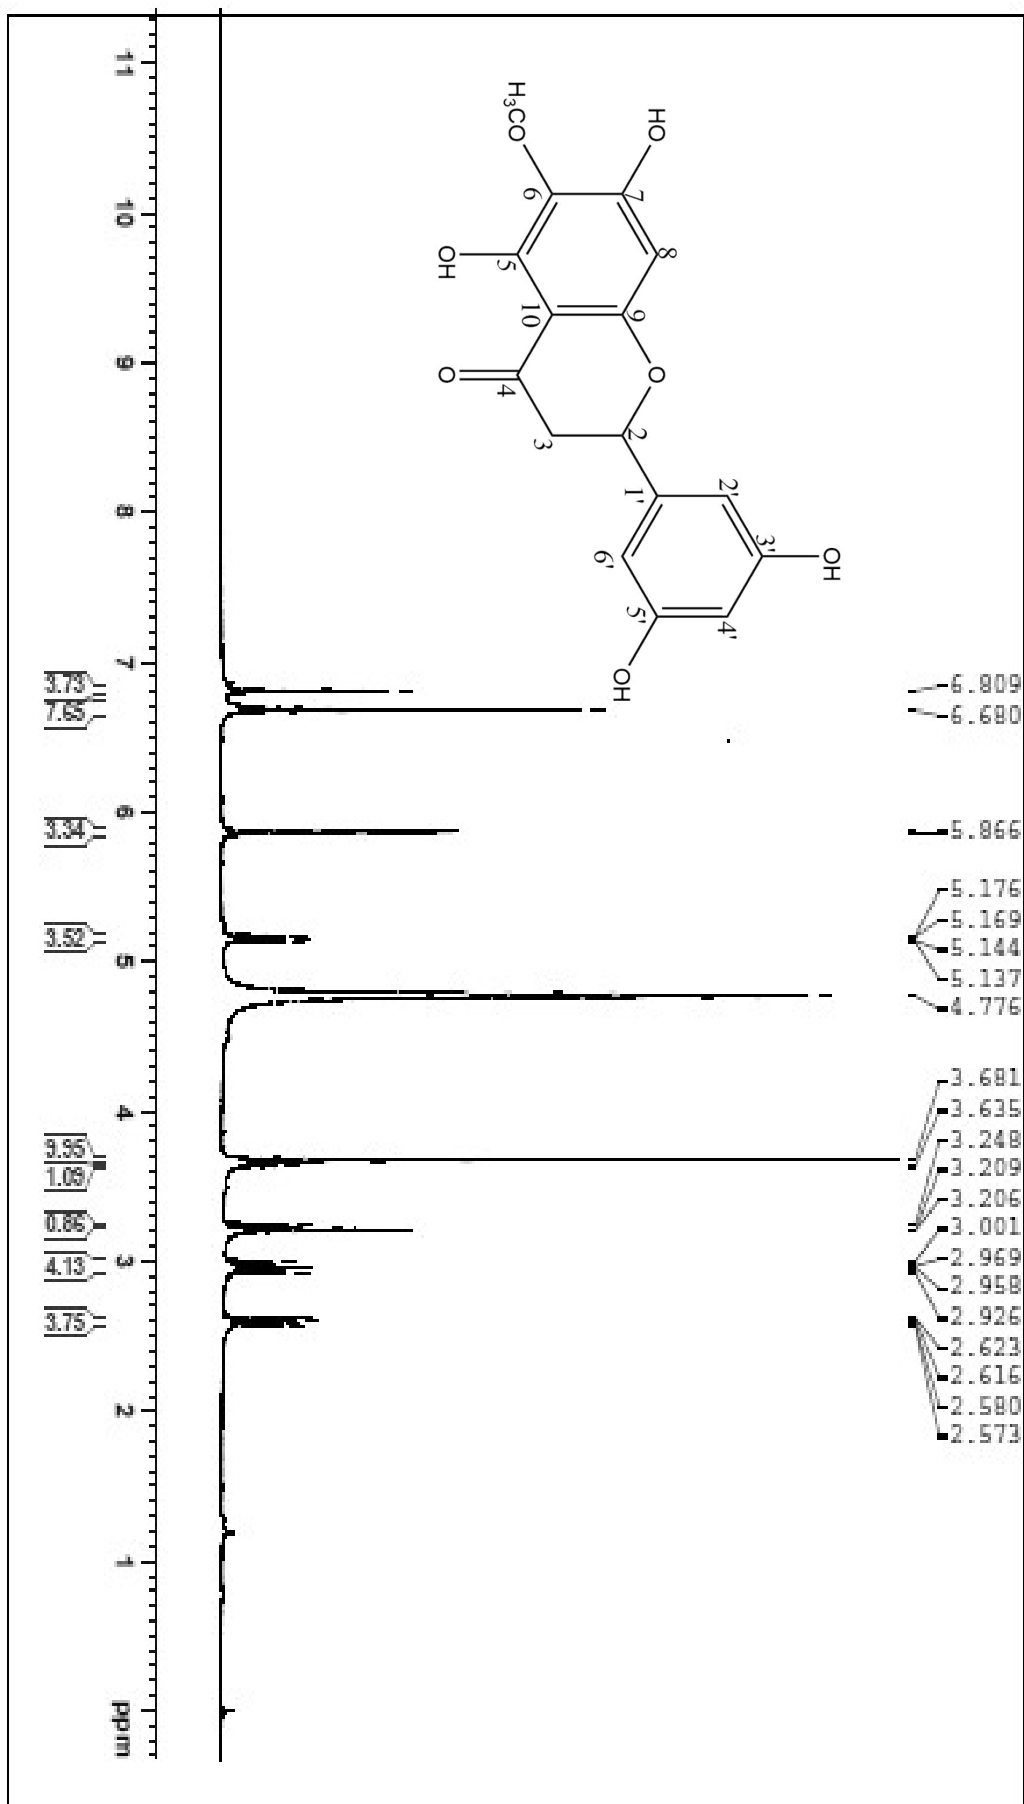

Figure S28: <sup>1</sup>H NMR spectrum of compound 13 in CD<sub>3</sub>OD

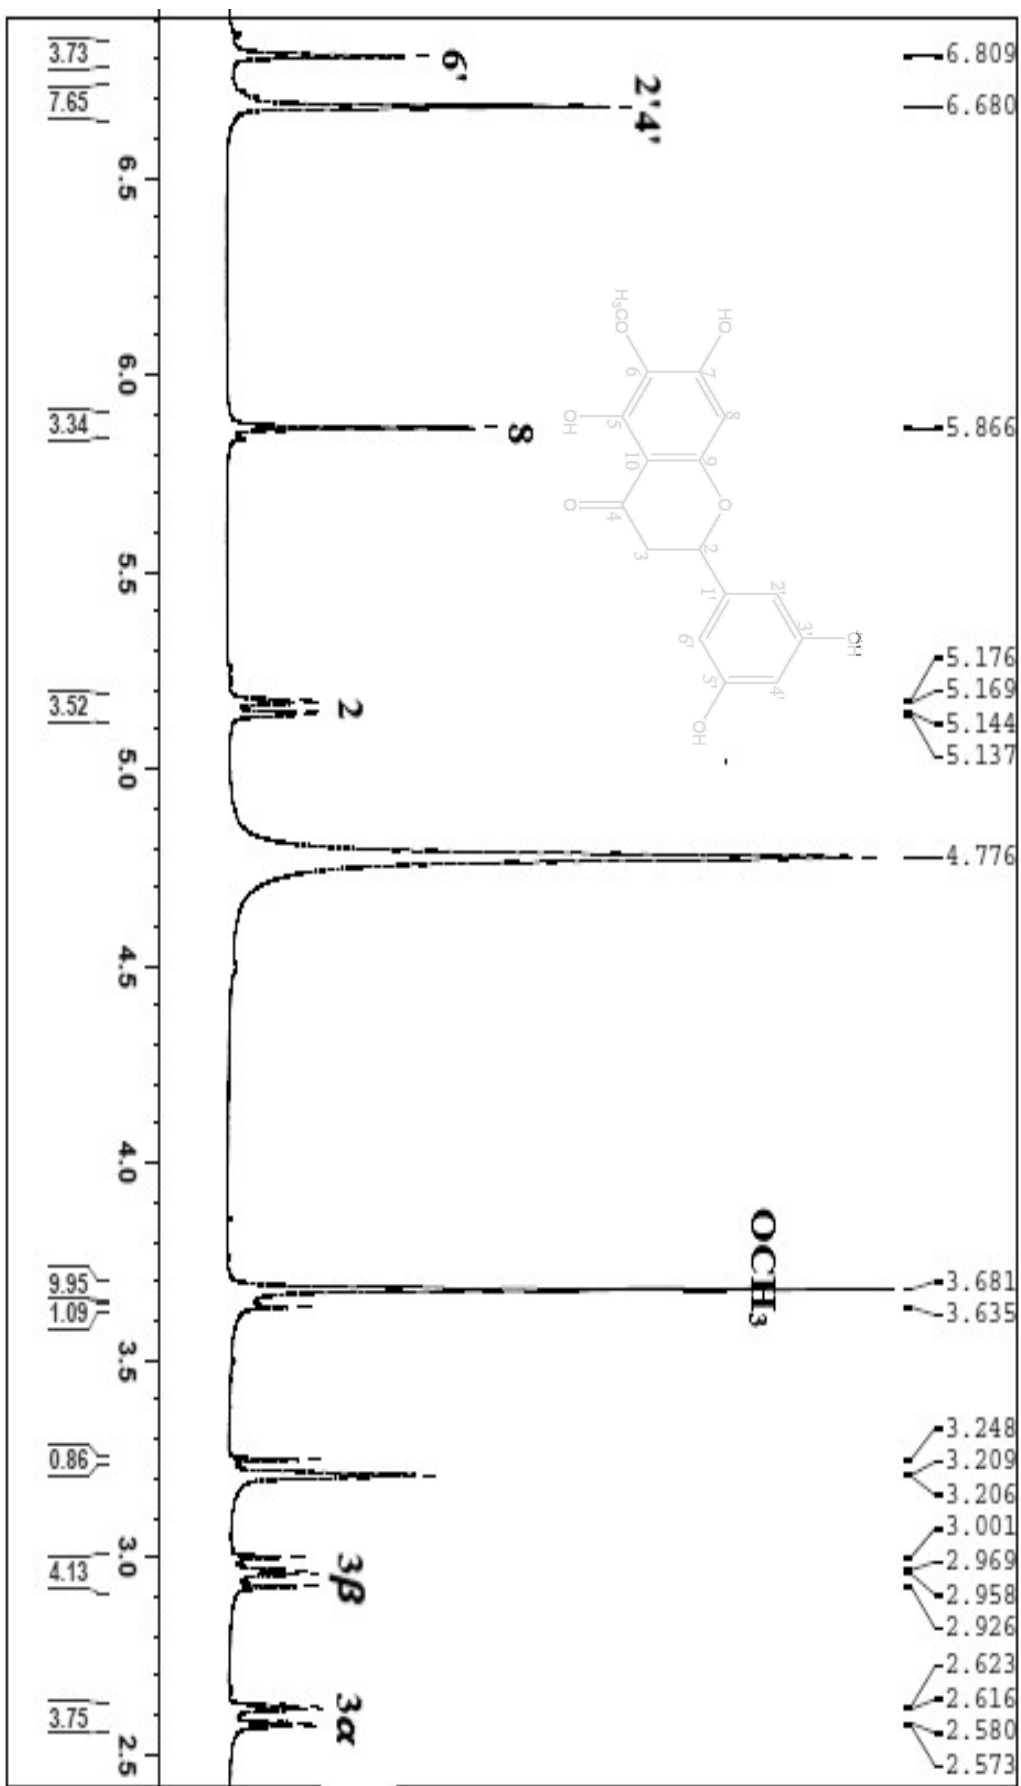

Figure S29: <sup>1</sup>H-NMR spectrum of compound 13 (expansion at  $\delta(2.5-6.8$  ppm)

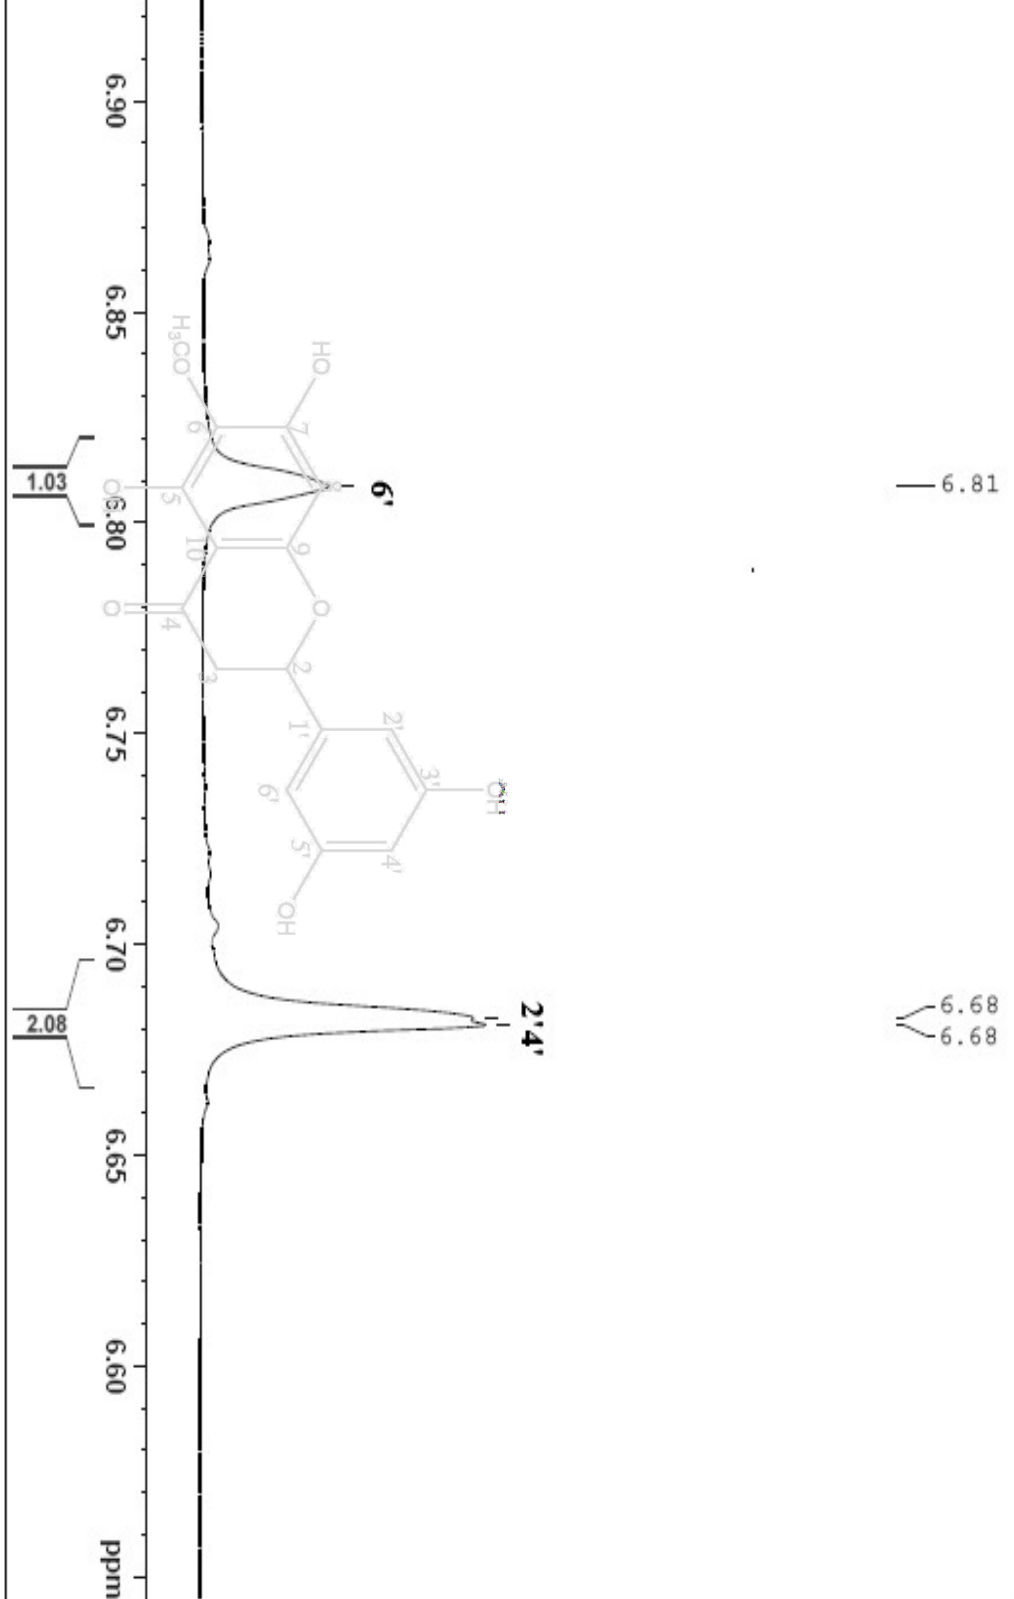

Figure S30:  $^1\text{H}$ -NMR spectrum of compound 13 (expansion at  $\delta(6.60\text{-}6.95\text{ ppm})$ )

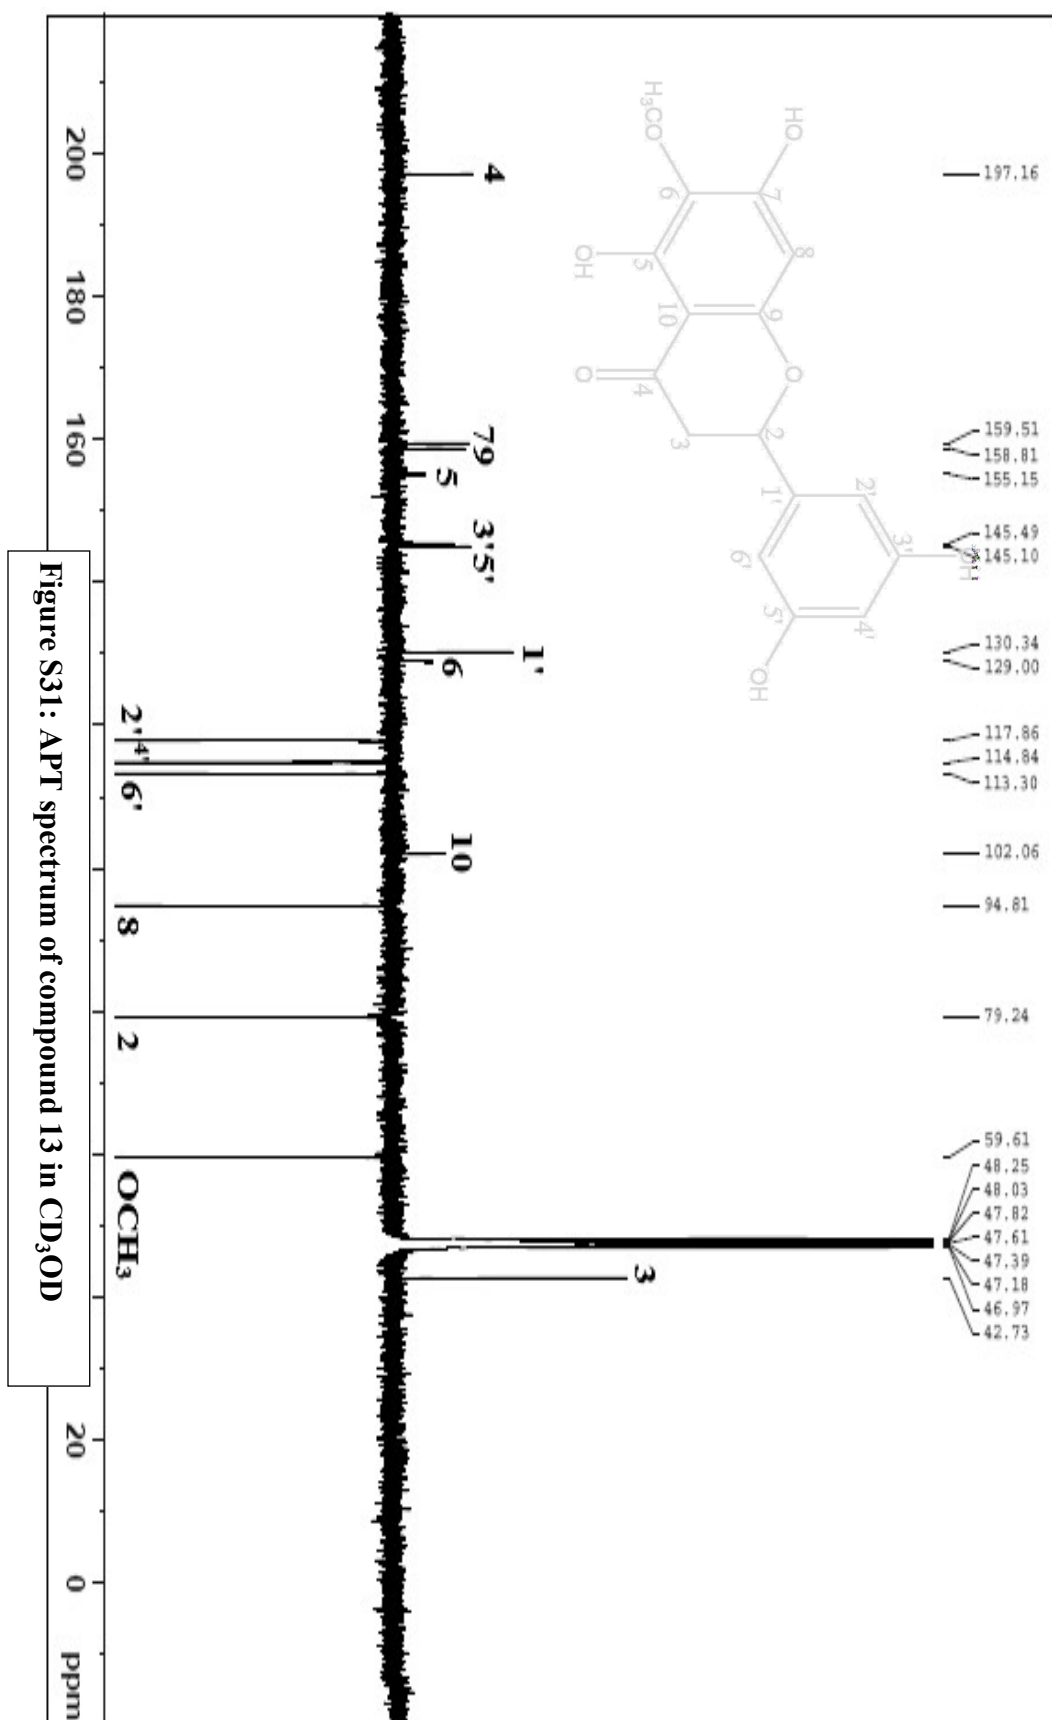

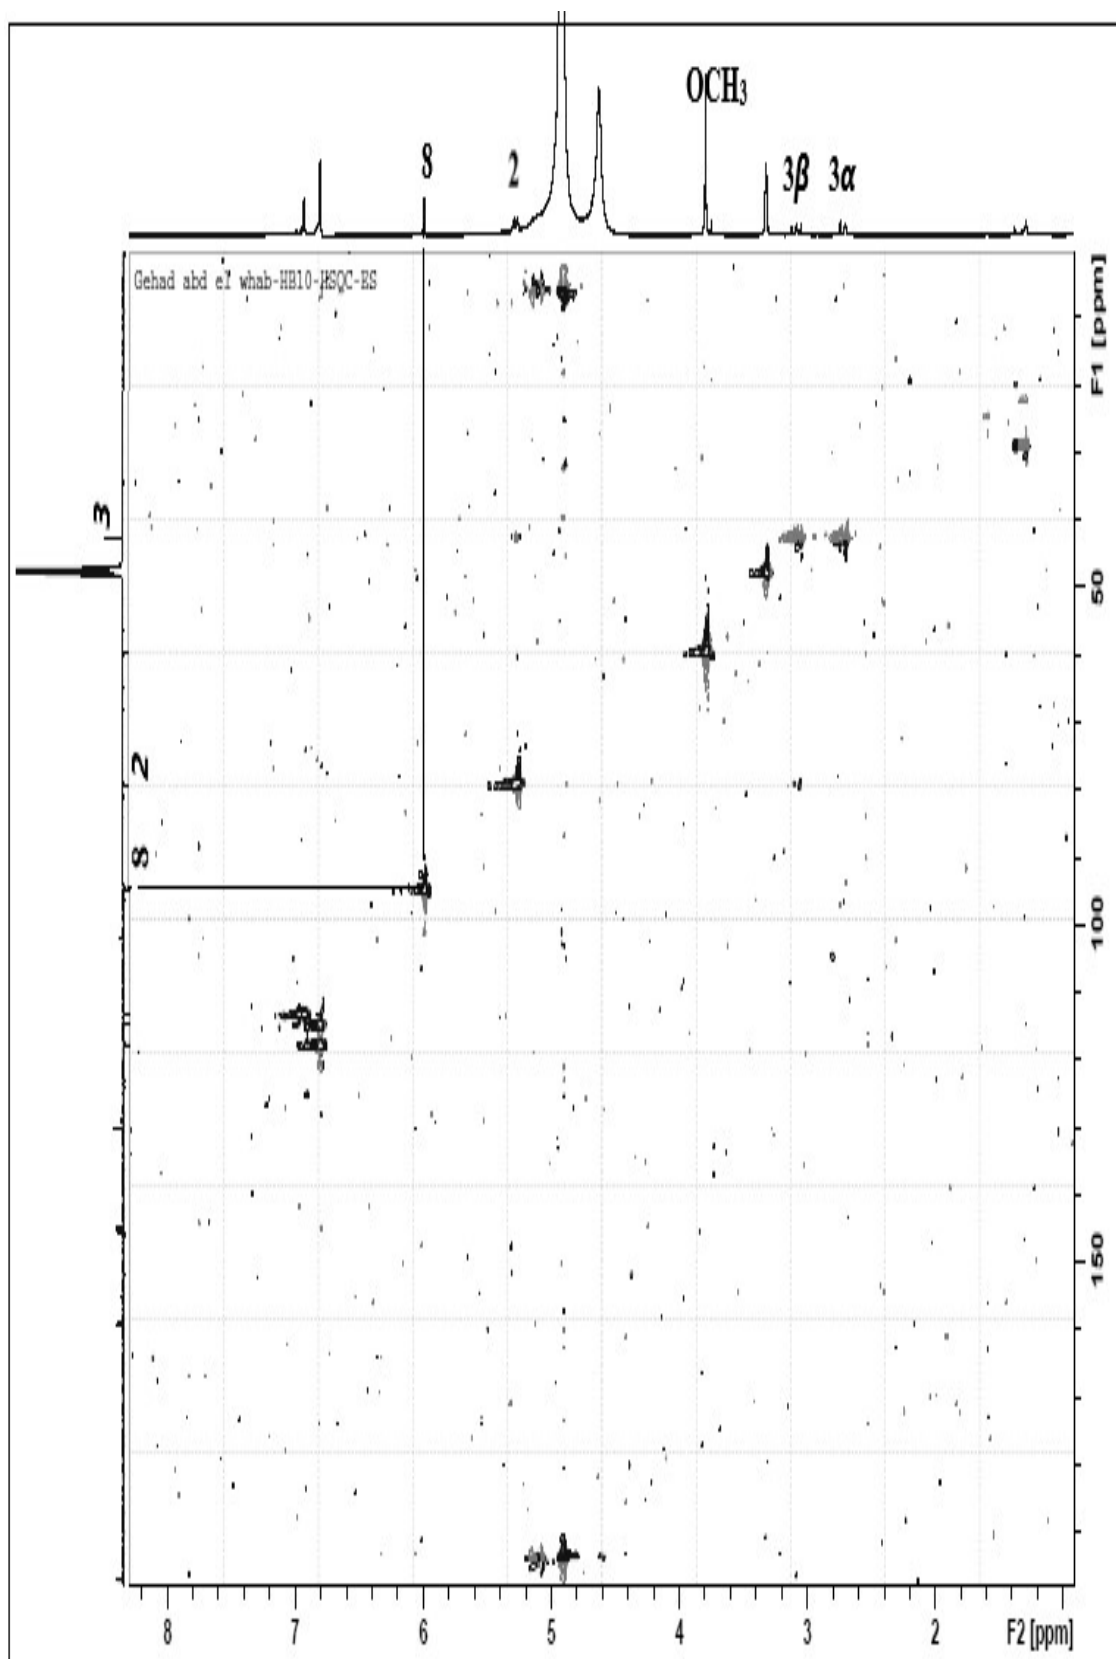

Figure S3:  $^2\text{D}$  HSQC NMR spectrum of compound 2

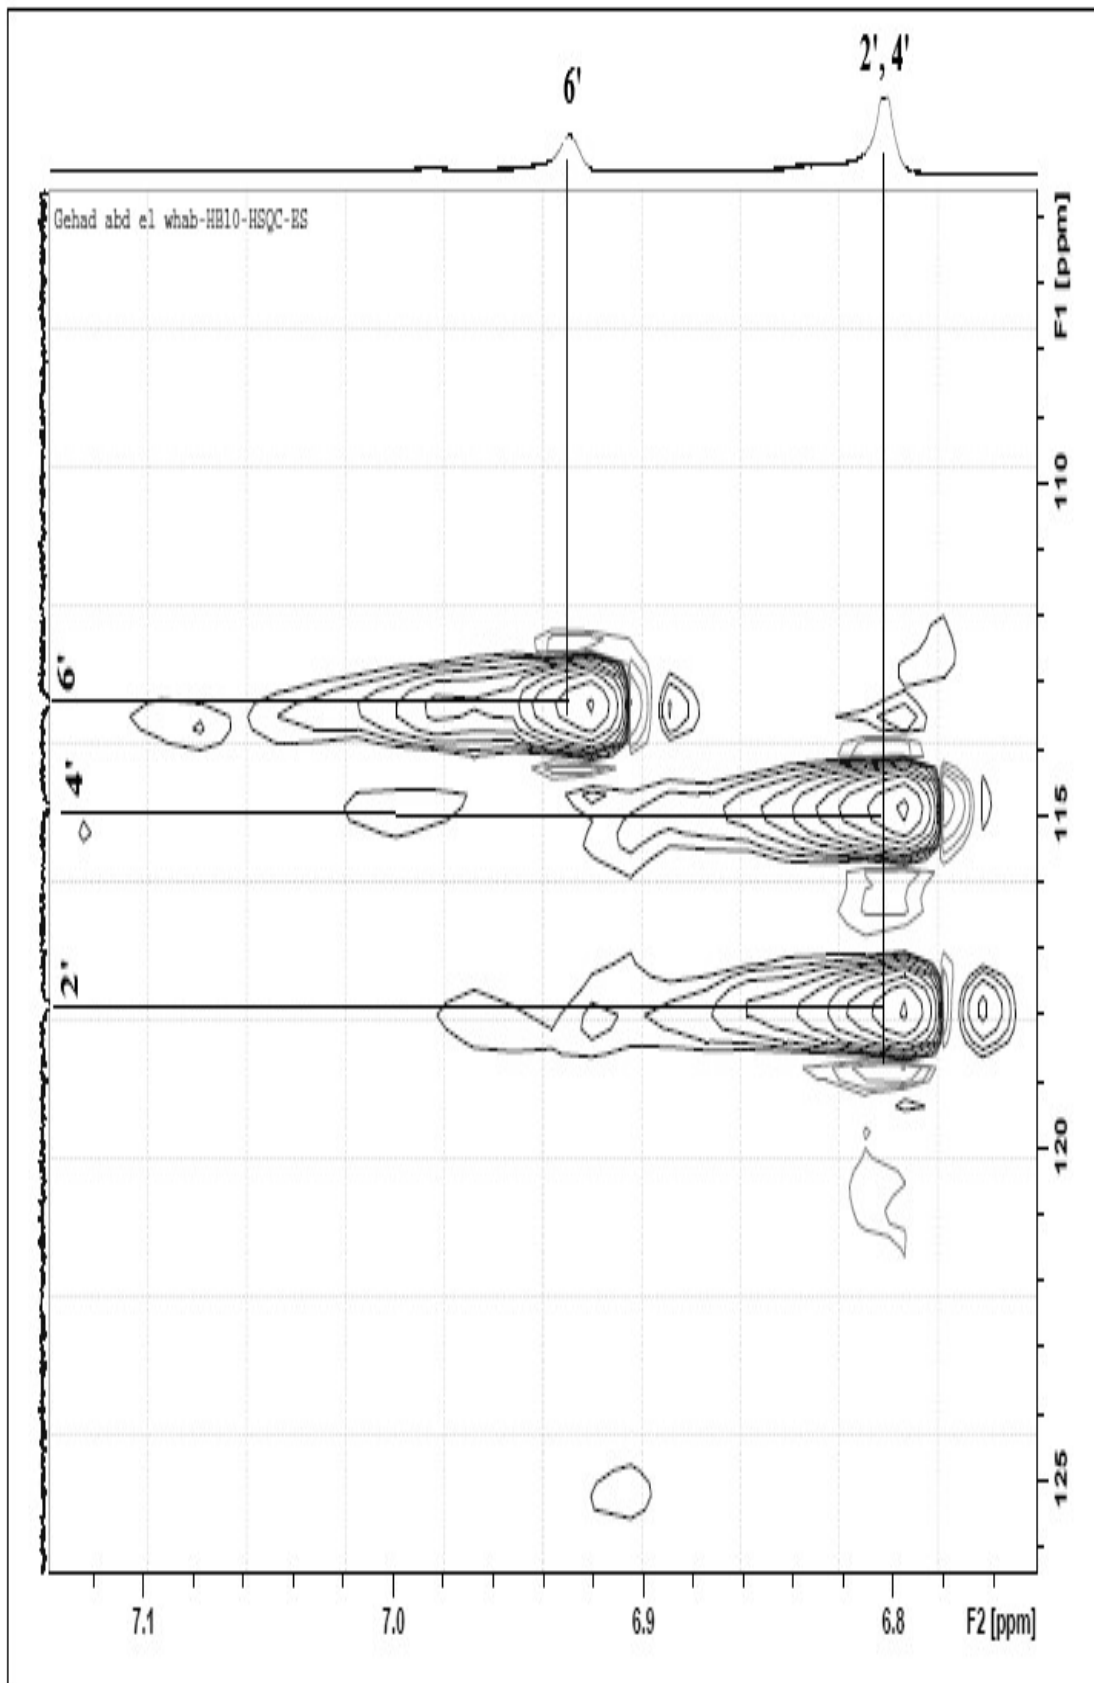

Figure S3:  $^1\text{H}$  S Q C ex pa nsi on of co m po un

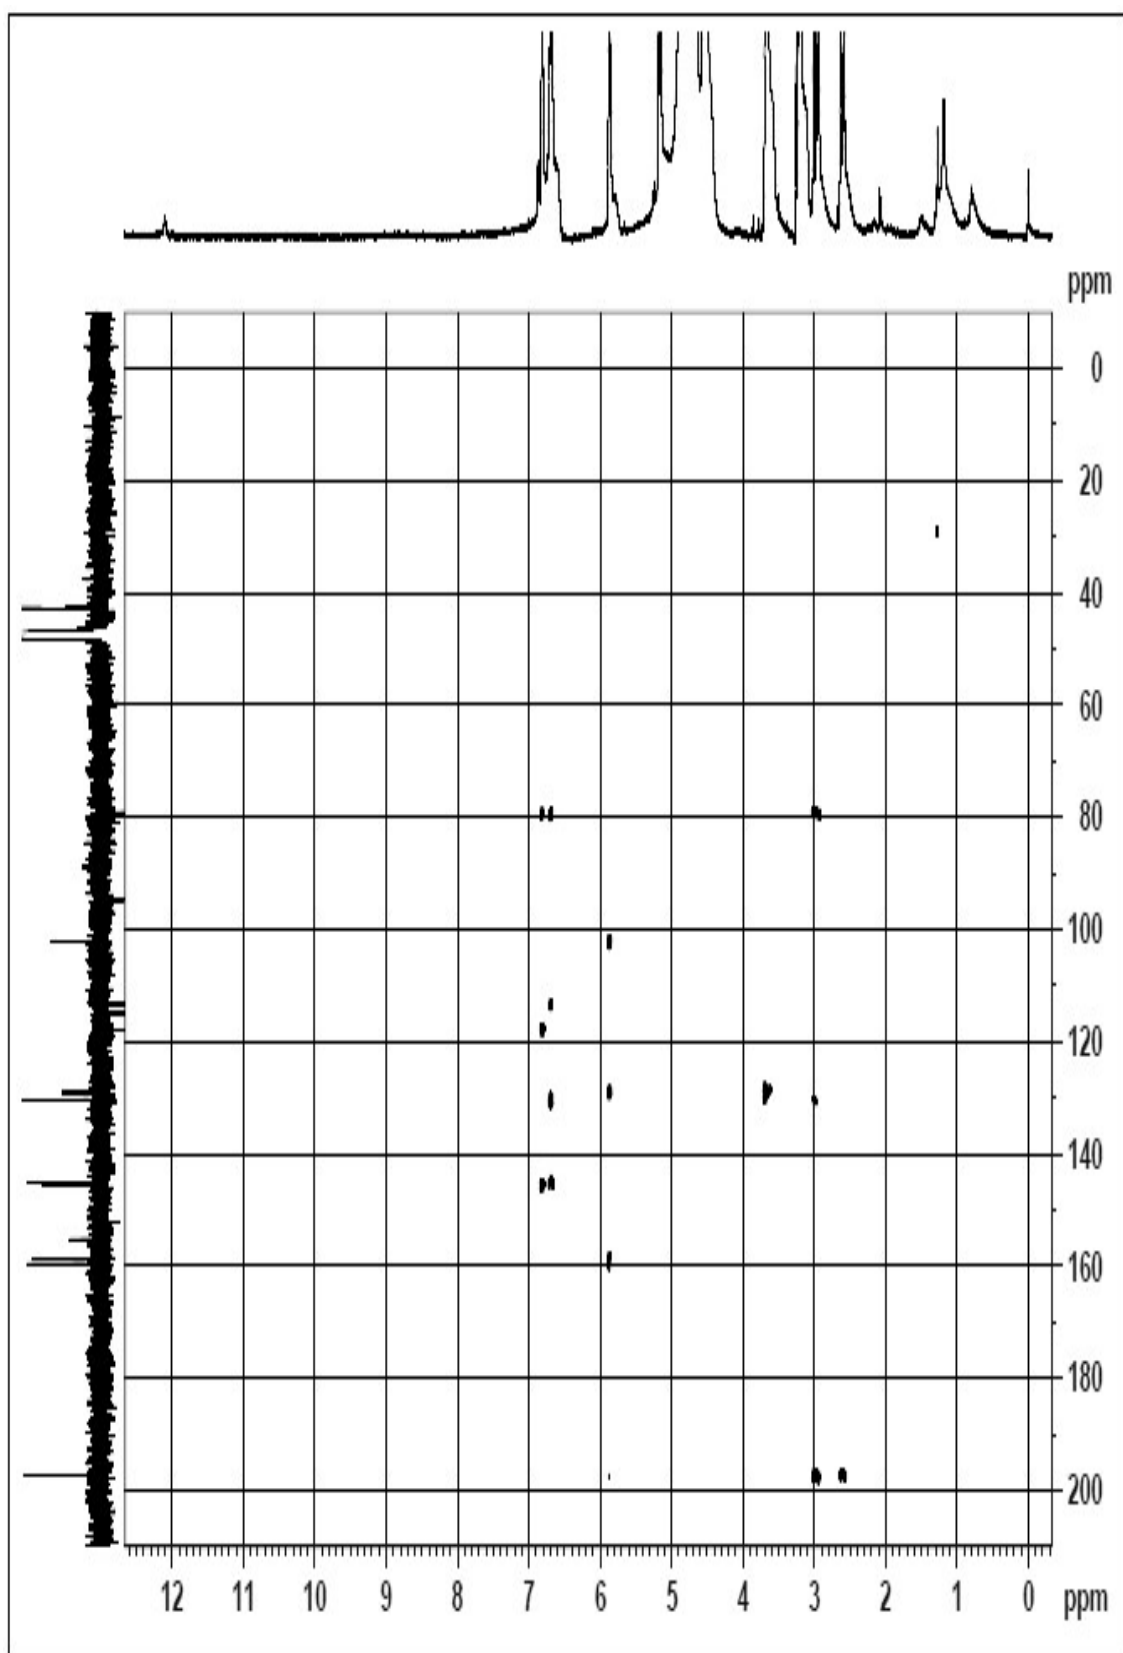

Figure S3: <sup>1</sup>H and <sup>13</sup>C NMR spectra of compound 4.

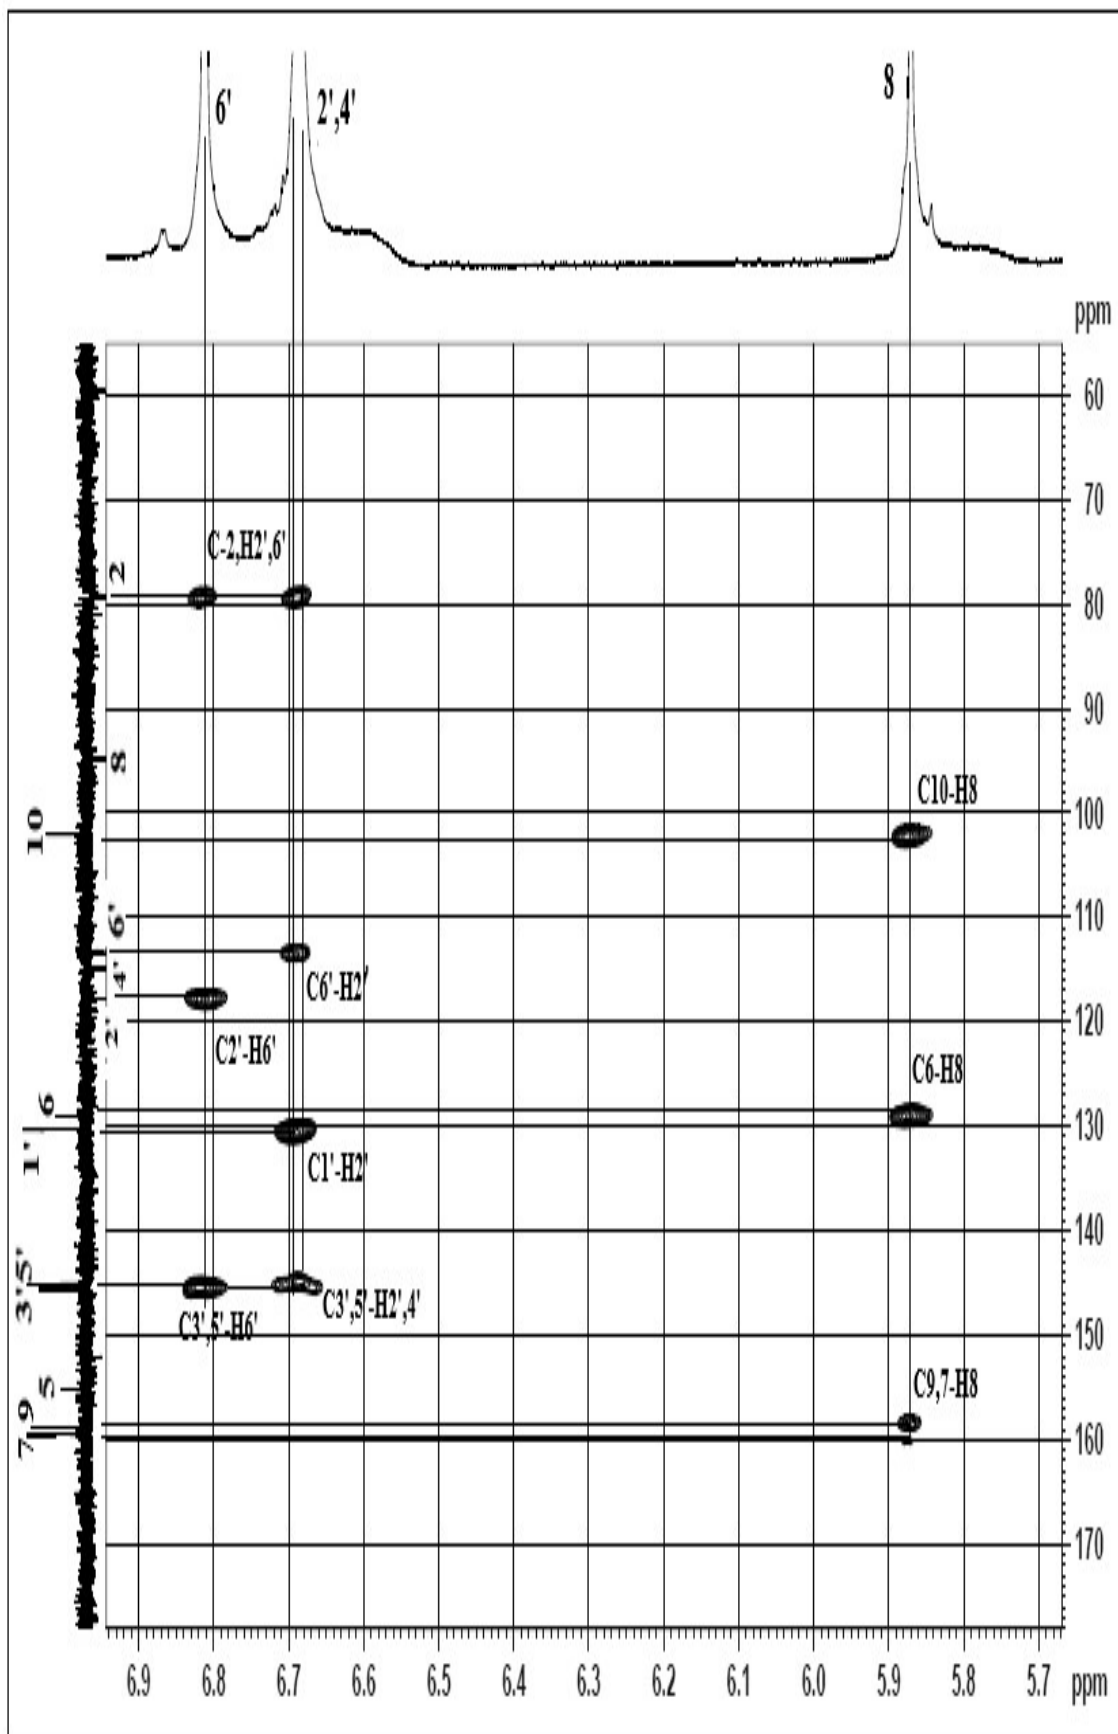

Figure S3:  $^1\text{H}$  NMR spectrum of compound 5b

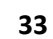

SRMH13 #281 RI: 4.75 AV: 1 NL: 2.13E+005  
T: + c ESI Full ms2 319.000 [100.000-400.000]

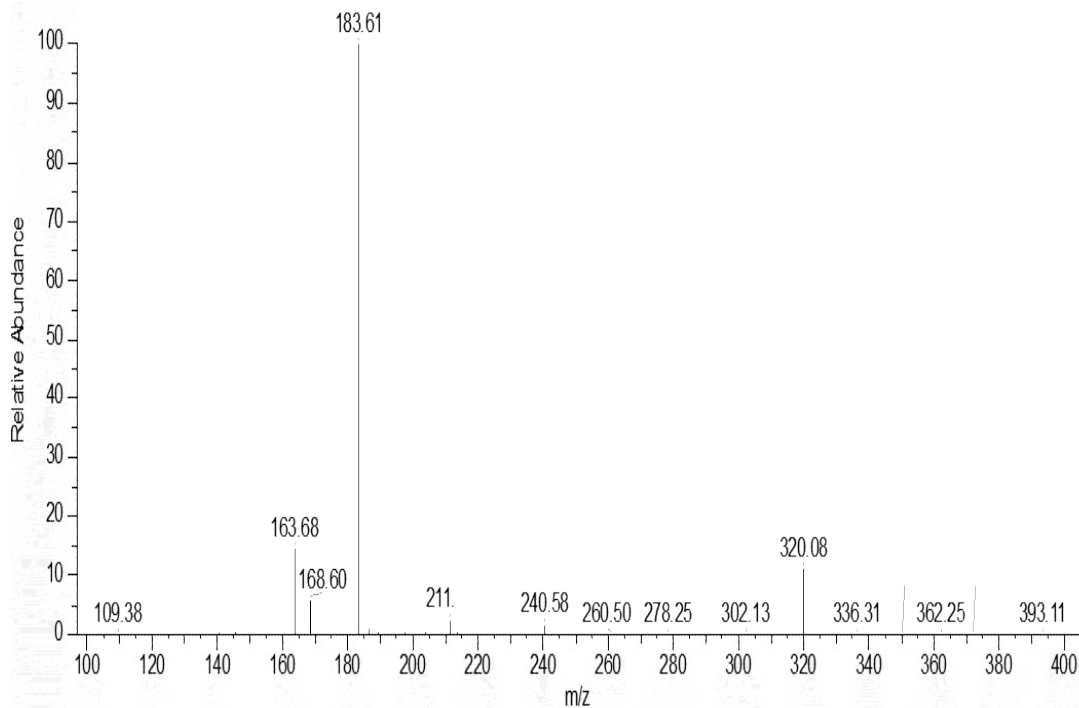

Figure S3: ESI-MS fragmentation pattern of compound

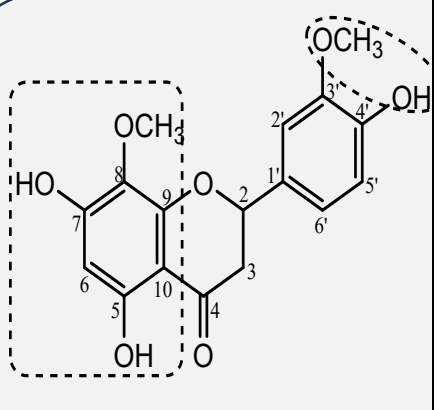

**Compound HM 8**

5,7,4'-trihydroxy-8,3'-dimethoxy flavanone

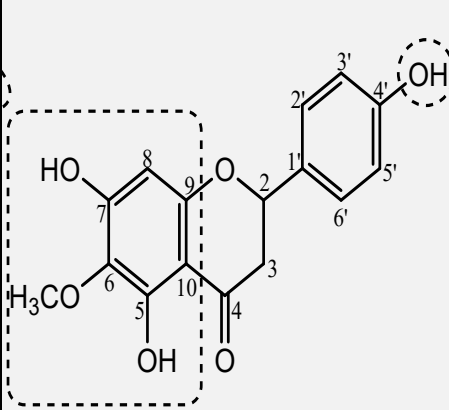

**Compound HM9**

5,7,4'-trihydroxy-6-methoxy flavanone

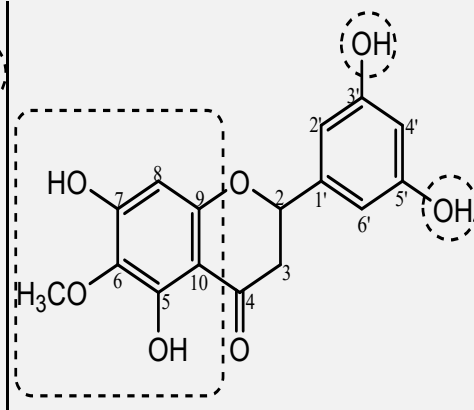

**Compound HM 13**

3',5',5,7-tetrahydroxy-6-methoxyflavanone

**Figure S38:** Structural differences between compounds 8,9& 13

Chemical Formula:  $C_{16}H_{14}O_7$

Exact mass  $[M+H]^+$ : 319.24

Calculated mass  $[M+H]^+$ : 319.28

**Compound 14**

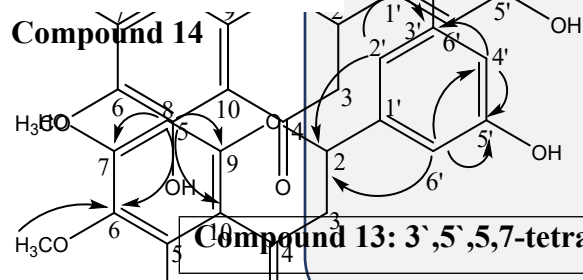

**Compound 13: 3',5',5,7-tetrahydroxy-6-methoxyflavanone**

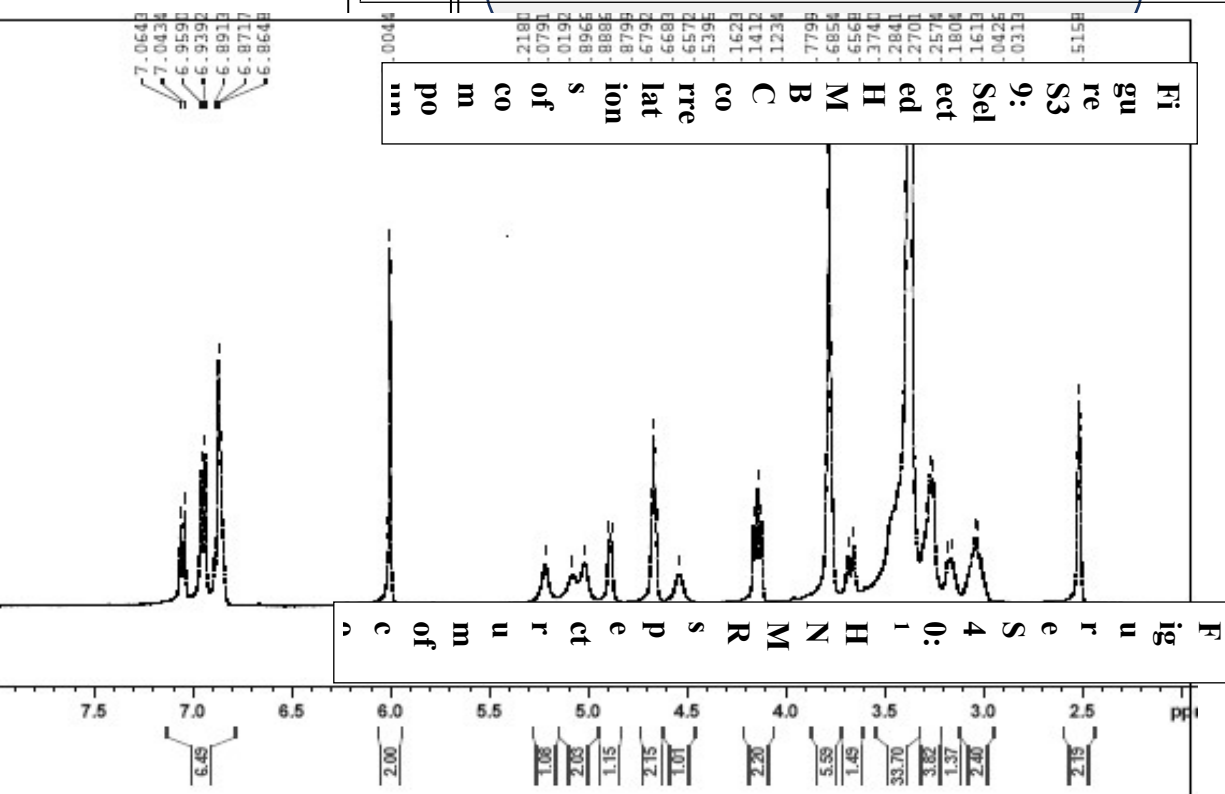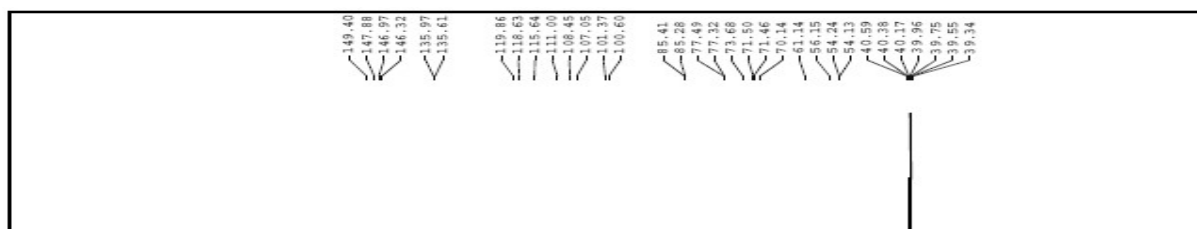

## Compound 15

Figure S41: APT spectrum of compound 14 in DMSO- $d_6$

## Compound 15

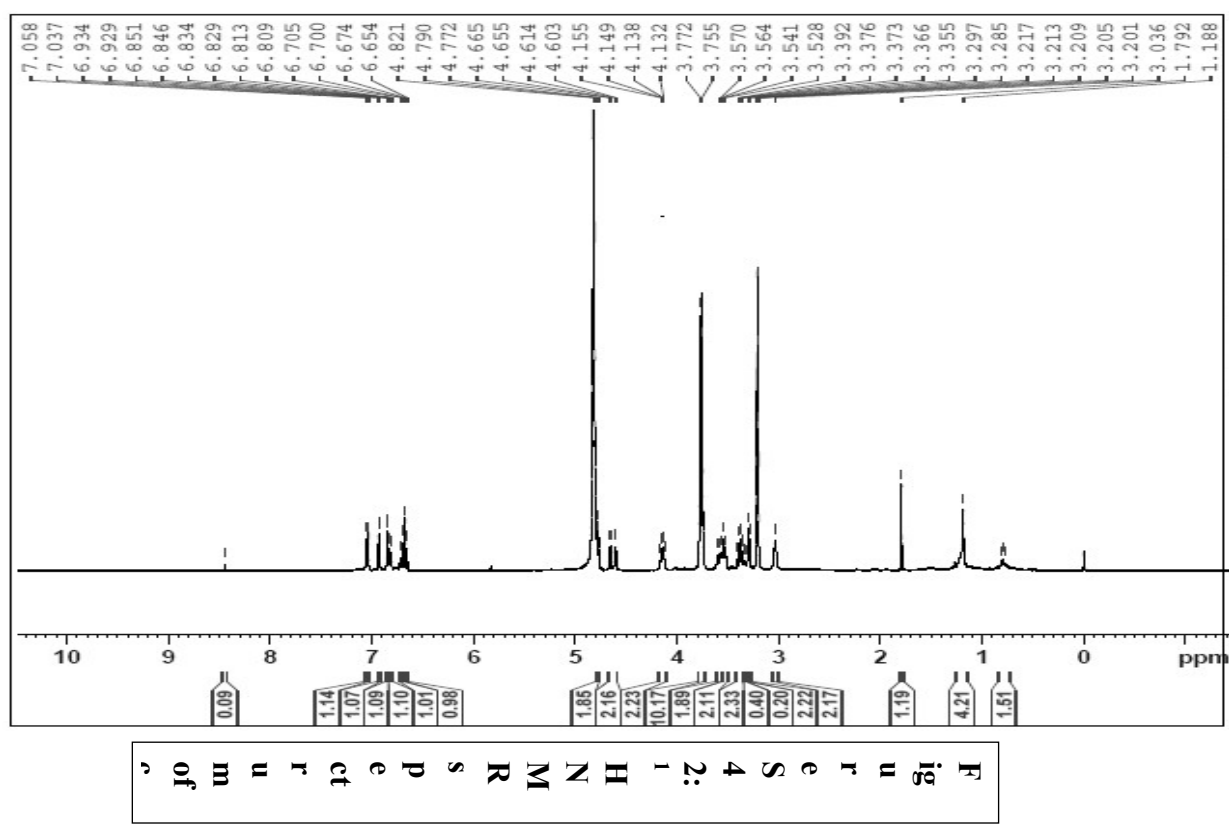

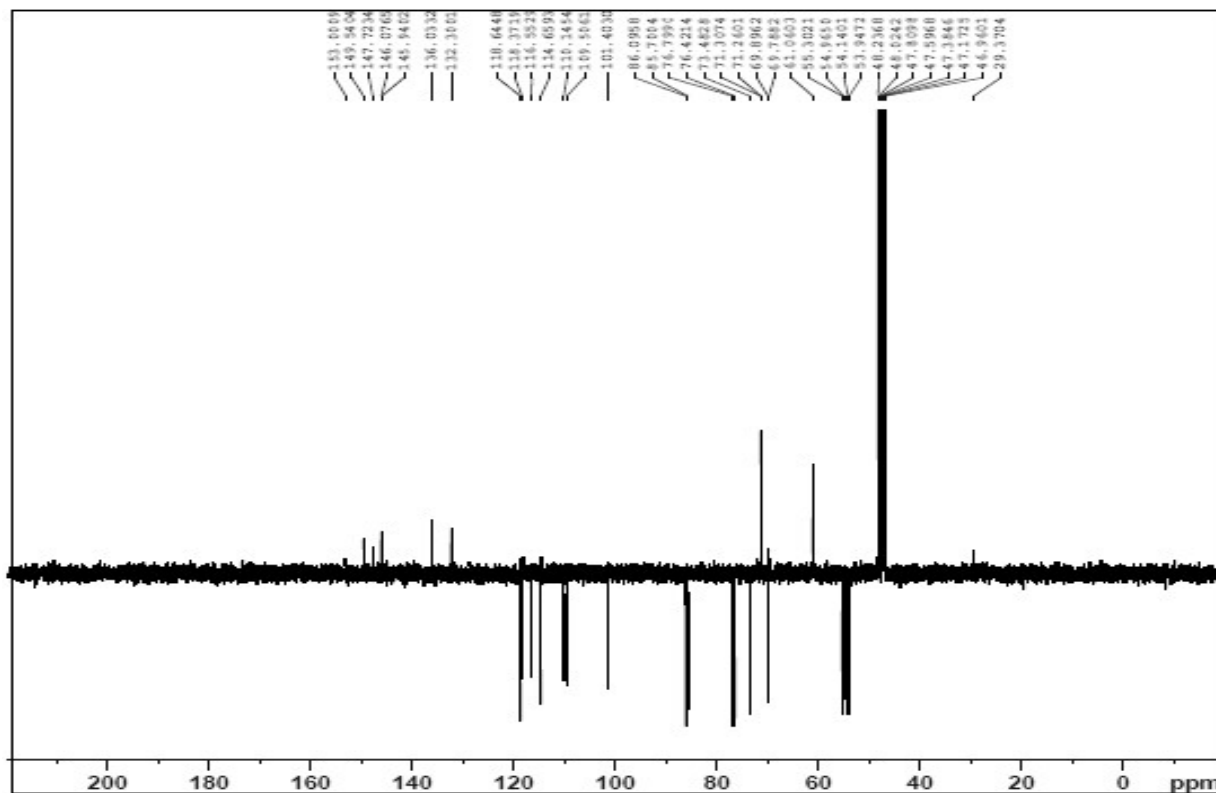

Figure S4: APT spectrum of compound 16 in CD<sub>3</sub>

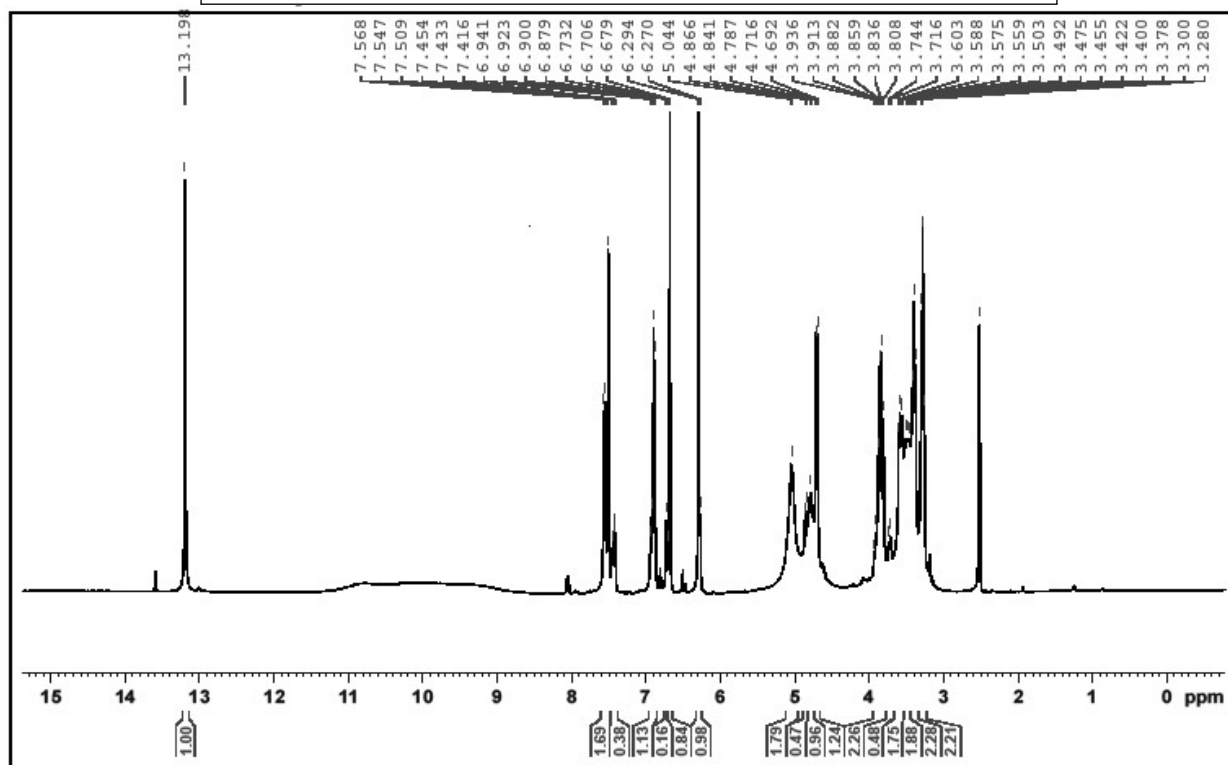

Figure S4: 1H NMR spectrum of compound 16 in DMS

Compound 17

Figure S4: A PT spectrum of compound 16 in DMS

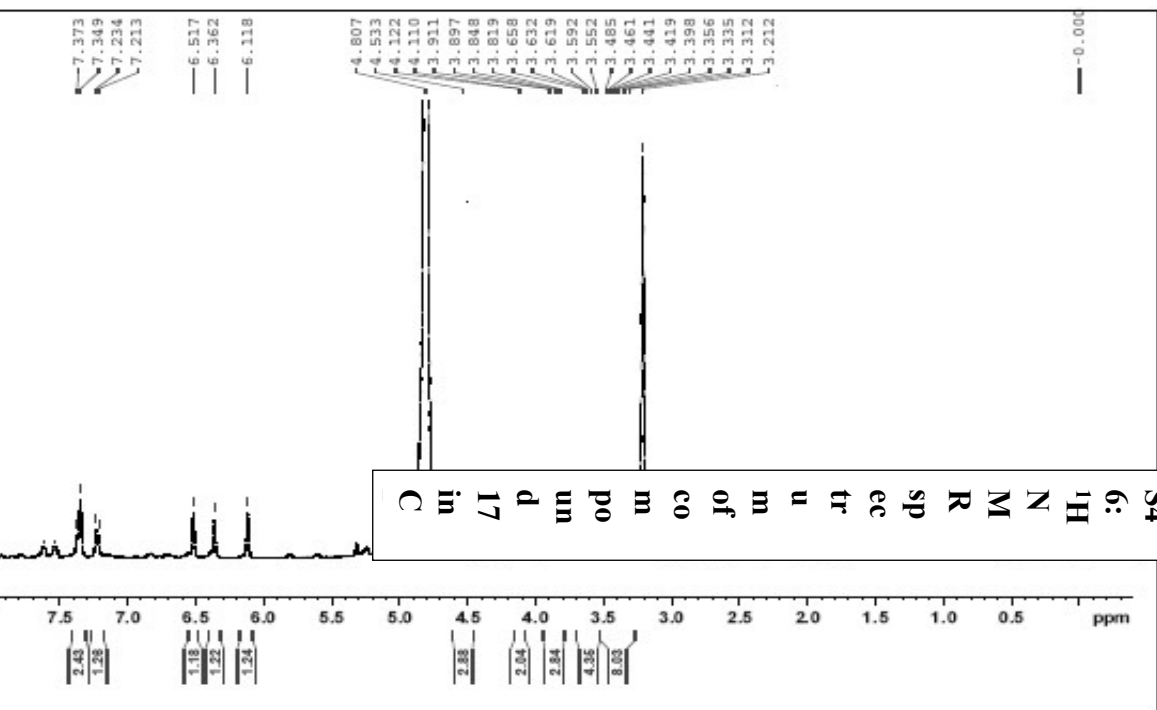

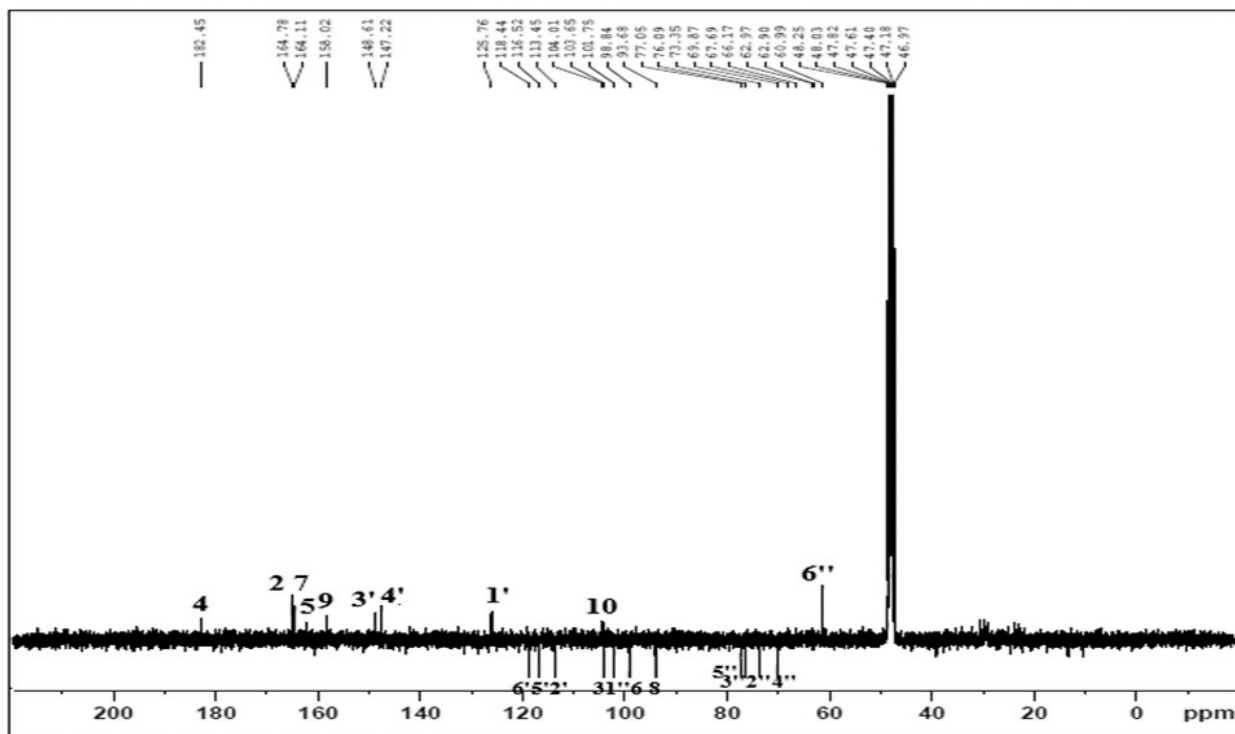

Figure S4: <sup>13</sup>C NMR spectrum of compound 7 in CD<sub>3</sub>OD

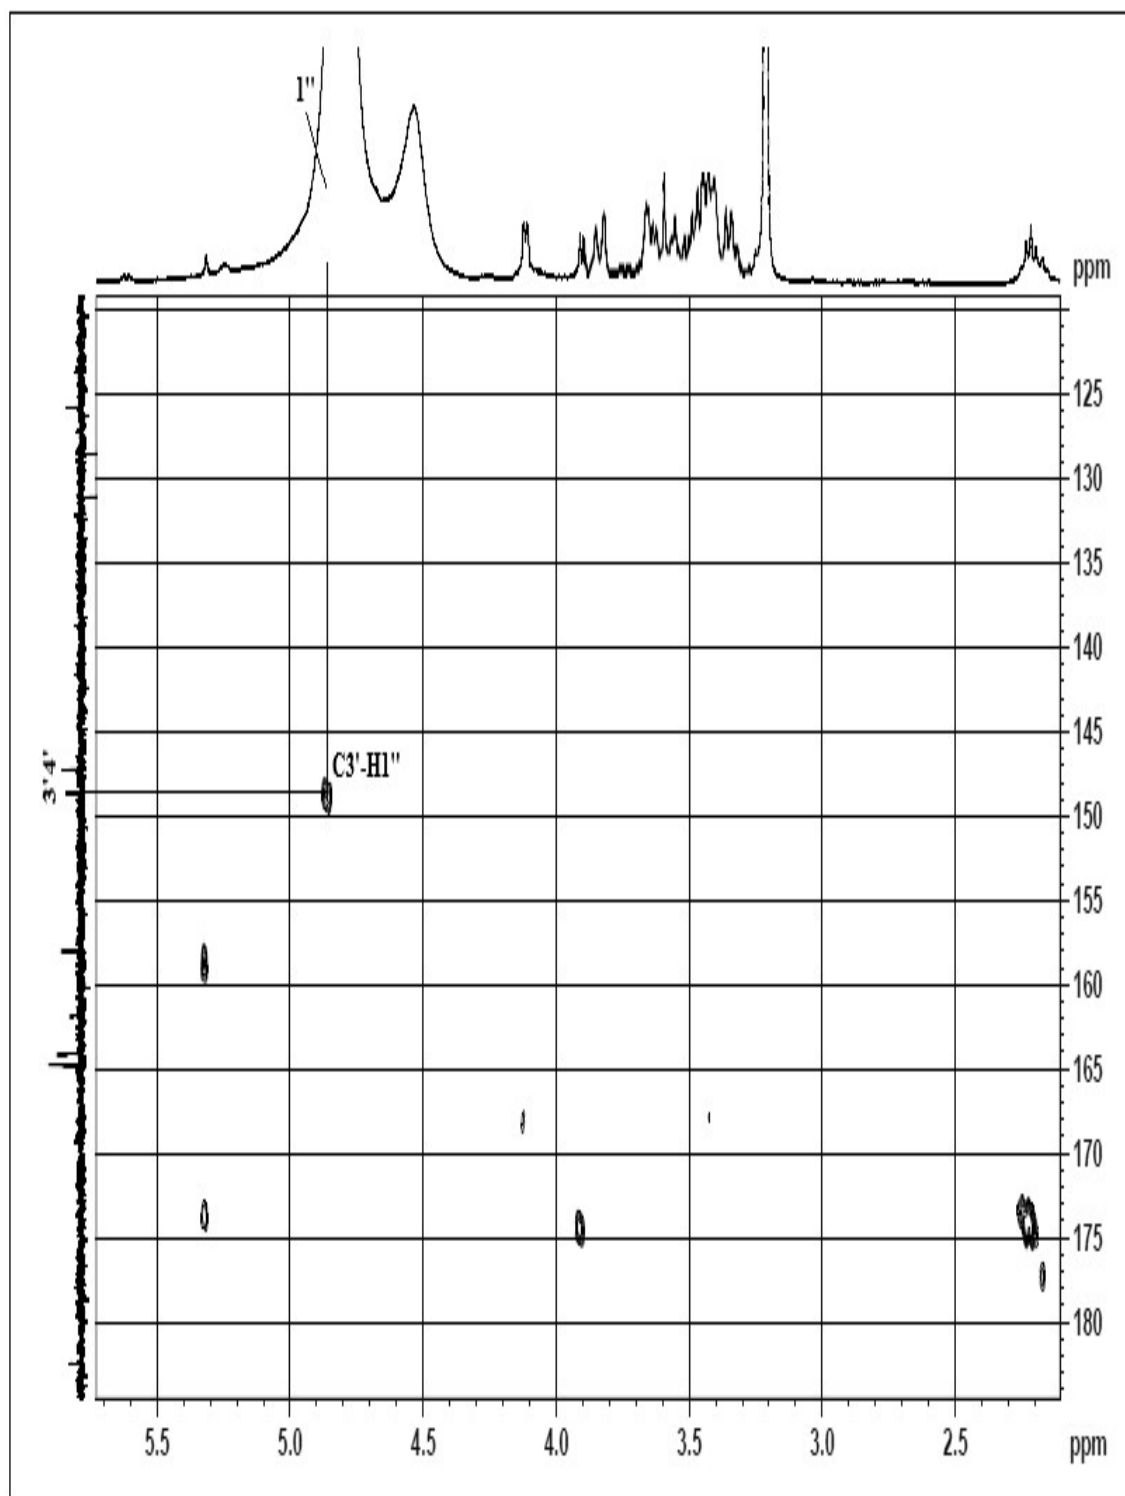

Figure S4:  $^1\text{H}$  and  $^{13}\text{C}$  NMR spectra of compound 8.

# Compound 18

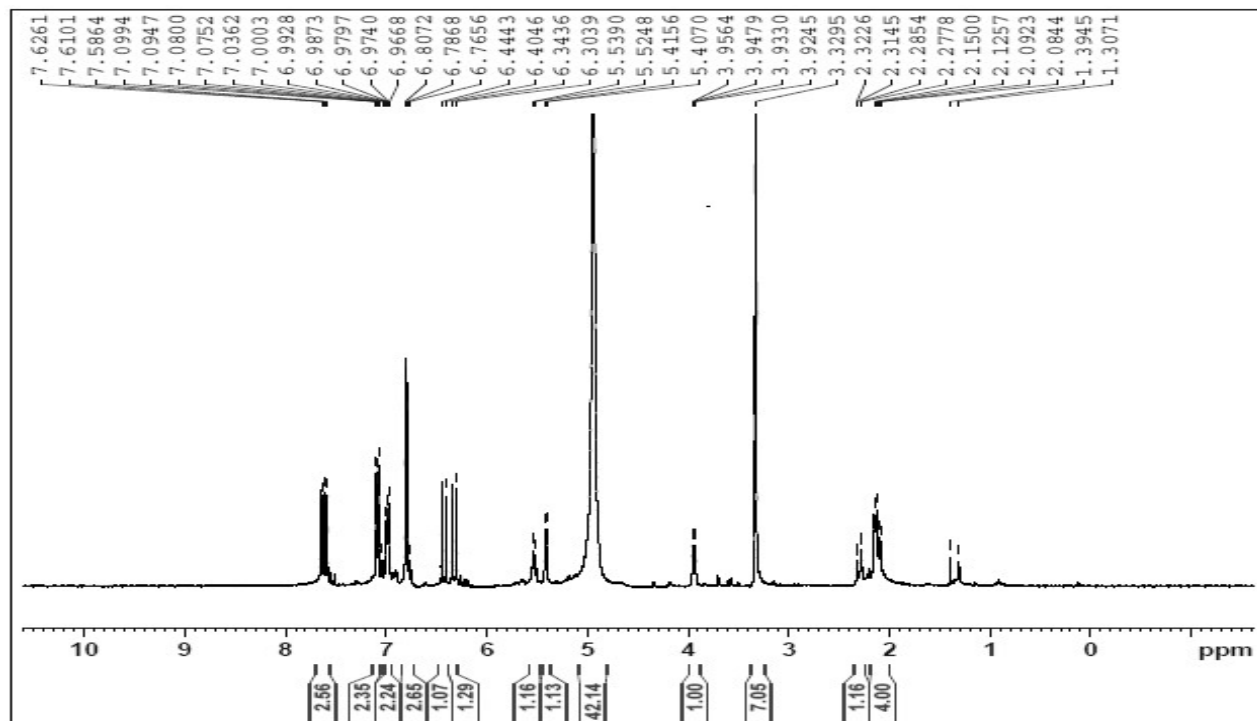

Figure S4.9: <sup>1</sup>H NMR spectrum of compound 18

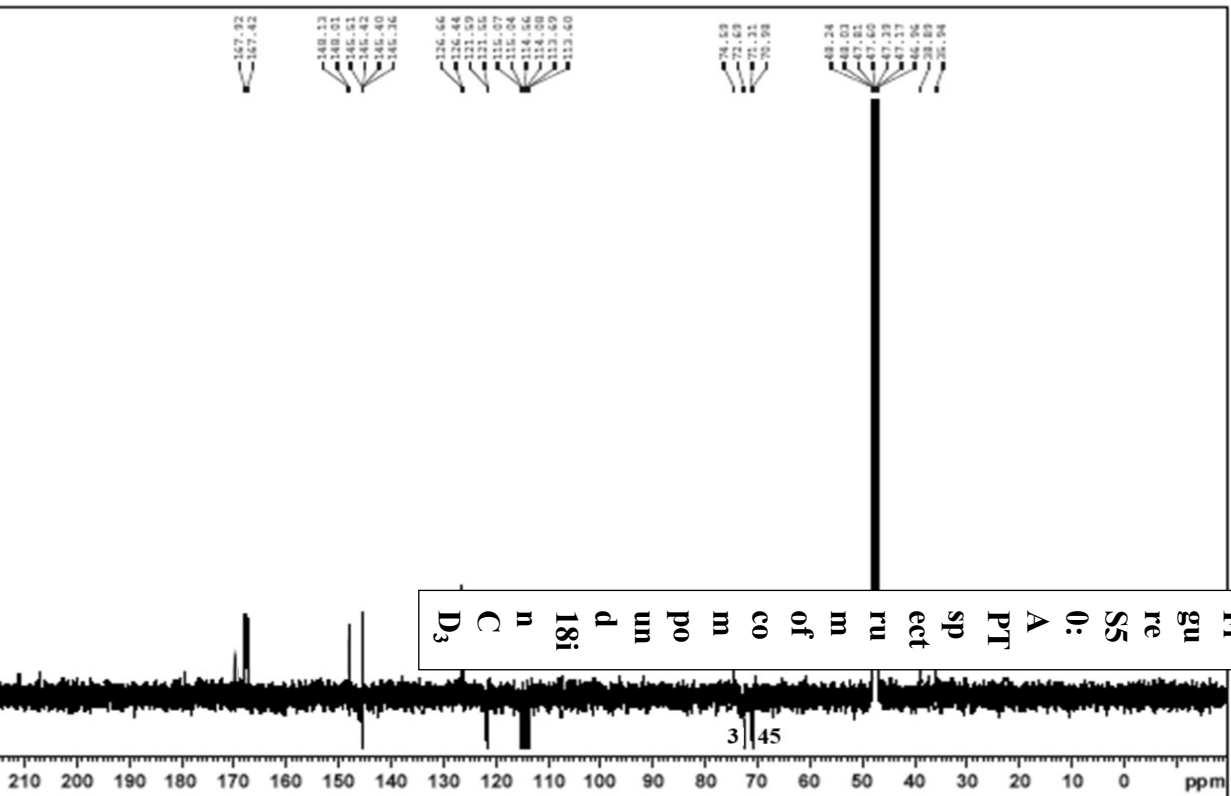

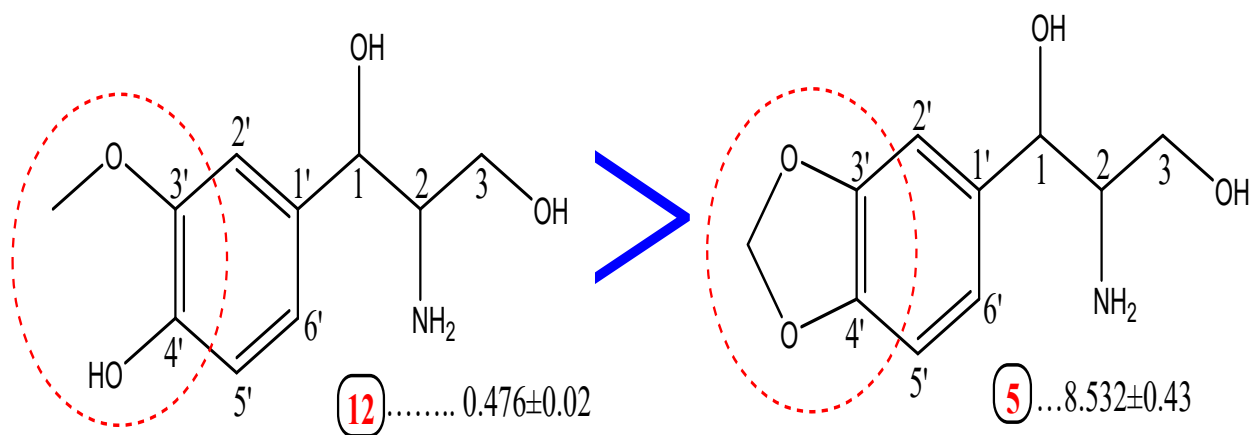

Figure S5: 1: SA R of compound 12 versus m

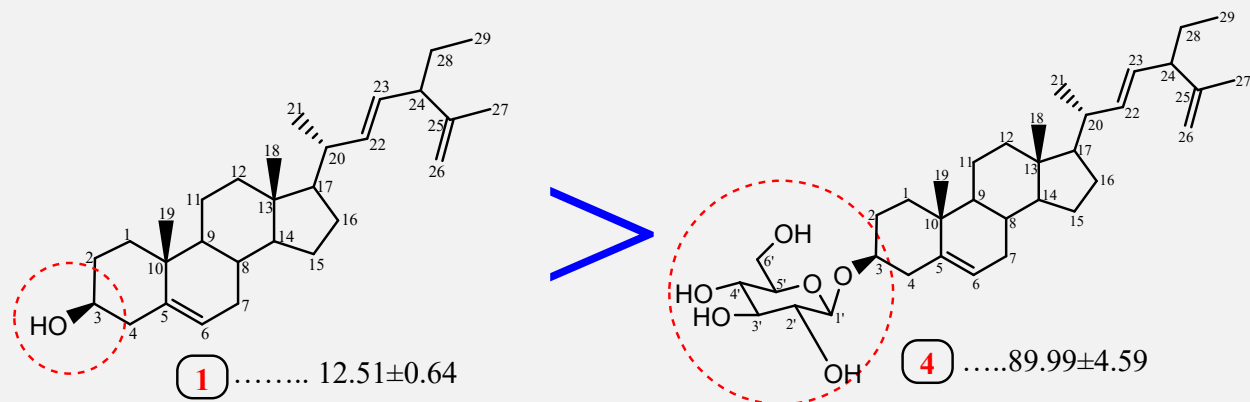

Figure S5: 2: SA R of compound 1 versus m

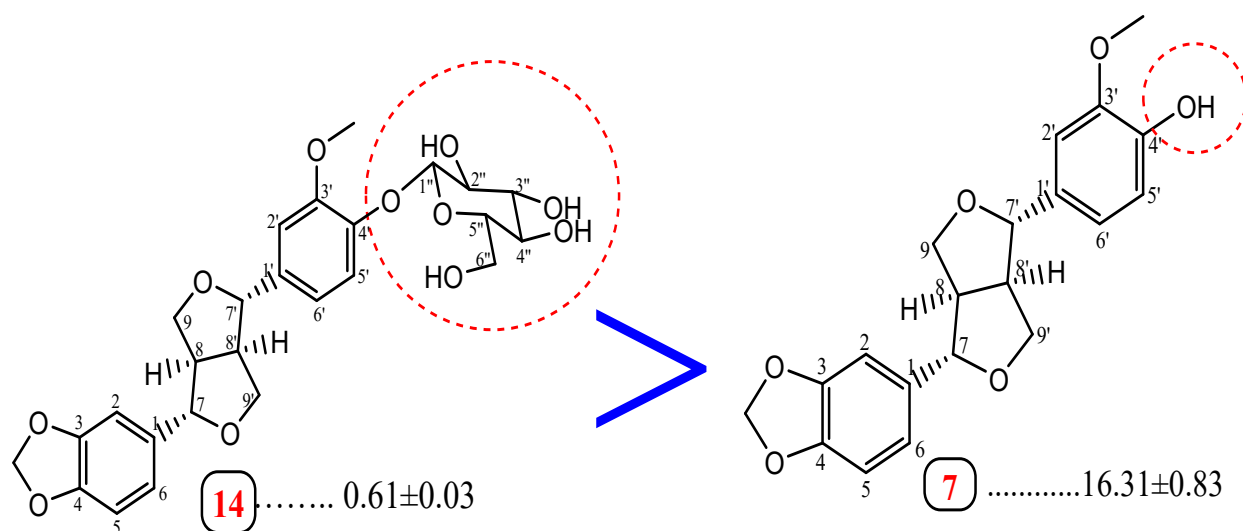

Figure S5: SA R of compound 14 versus com

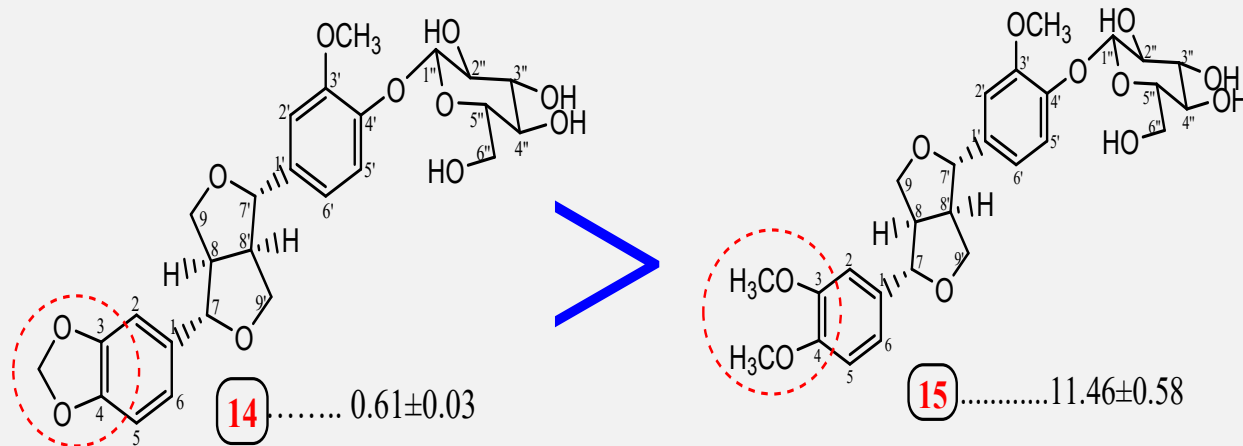

Figure S5: SA R of compound 14 versus com

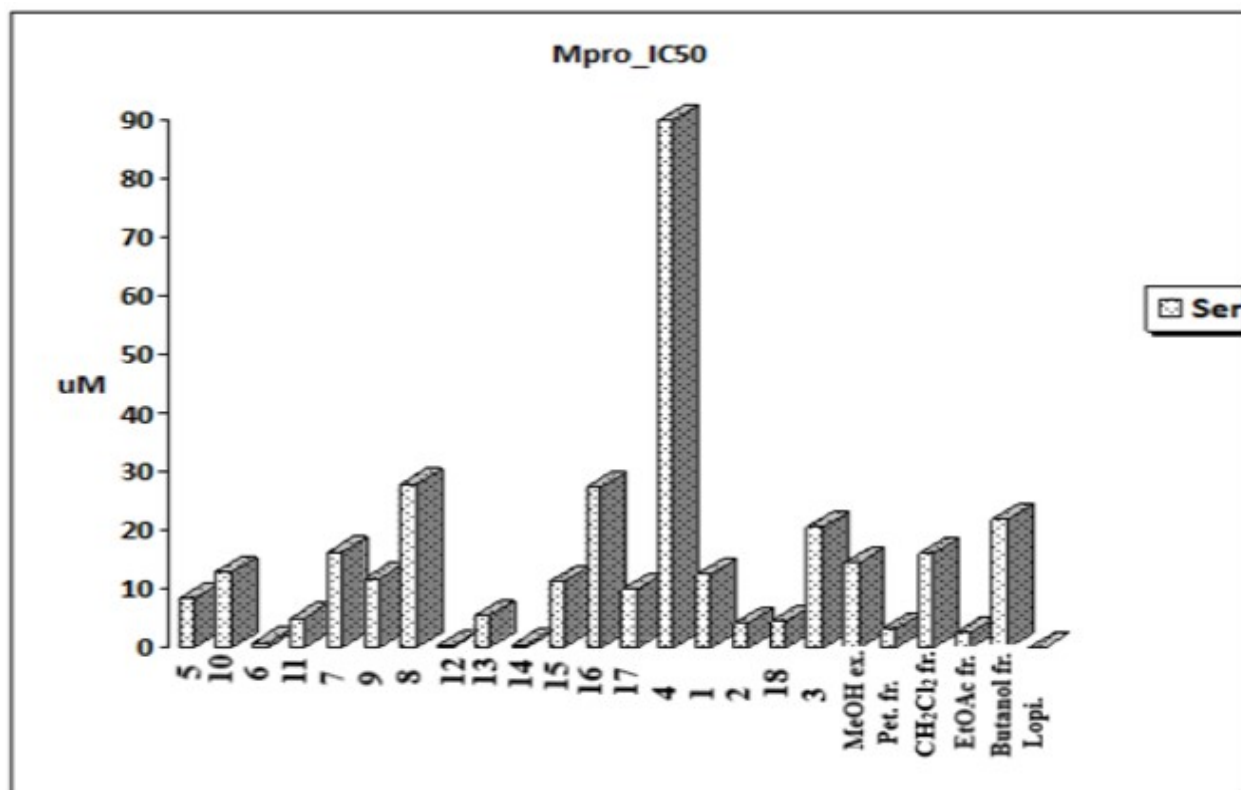

**Figure (S55): The SARS-COV-2 M<sup>pro</sup> inhibition (IC<sub>50</sub> µg/ml) of methanolic extract, fractions and the isolated compounds against the standard lopinavir**

**Table S1: UV  $\lambda_{\text{max}}$  (nm) of compounds 8, 9, 13, 10, 11, 16 & 17 in methanol and in different shift reagents**

| Compounds                    | Band      | MeOH | NaOCH <sub>3</sub> | AlCl <sub>3</sub> | AlCl <sub>3</sub> /HCl | NaOAc      | NaOAc/H <sub>3</sub> BO <sub>3</sub> |
|------------------------------|-----------|------|--------------------|-------------------|------------------------|------------|--------------------------------------|
| <b>Flavanones</b>            |           |      |                    |                   |                        |            |                                      |
| <b>8</b>                     | <b>I</b>  | 236  | 245                | 235               | 235                    | 235        | 238                                  |
|                              | <b>II</b> | 289  | <b>327</b>         | 310               | <b>309</b>             | <b>329</b> | 293                                  |
| <b>9</b>                     | <b>I</b>  | 232  | 243                | 231               | 231                    | 234        | 238                                  |
|                              | <b>II</b> | 291  | <b>326</b>         | 307               | <b>311</b>             | <b>331</b> | 294                                  |
| <b>13</b>                    | <b>I</b>  | 234  | 238                | 236               | 234                    | 237        | 237                                  |
|                              | <b>II</b> | 289  | <b>291</b>         | 293               | <b>308</b>             | <b>320</b> | 295                                  |
| <b>Flavones</b>              |           |      |                    |                   |                        |            |                                      |
| <b>10</b>                    | <b>I</b>  | 345  | <b>410</b>         | <b>357</b>        | <b>351</b>             | <b>409</b> | <b>328</b>                           |
|                              | <b>II</b> | 276  | 270                | <b>307</b>        | <b>306</b>             | <b>272</b> | 276                                  |
| <b>11</b>                    | <b>I</b>  | 323  | <b>306</b>         | <b>345</b>        | <b>345</b>             | <b>314</b> | <b>313</b>                           |
|                              | <b>II</b> | 278  | 287                | <b>310</b>        | <b>310</b>             | <b>294</b> | 299                                  |
| <b>Glucosidated flavones</b> |           |      |                    |                   |                        |            |                                      |
| <b>16</b>                    | <b>I</b>  | 346  | <b>406</b>         | <b>424</b>        | <b>382</b>             | <b>392</b> | <b>380</b>                           |
|                              | <b>II</b> | 271  | 277                | <b>346</b>        | <b>361</b>             | <b>277</b> | 268                                  |
| <b>17</b>                    | <b>I</b>  | 331  | <b>387</b>         | <b>363</b>        | <b>364</b>             | <b>397</b> | <b>336</b>                           |
|                              | <b>II</b> | 271  | 279                | <b>342</b>        | <b>339</b>             | <b>310</b> | 290                                  |

**Table S2:**  
**<sup>1</sup>H-NMR and APT values of compound 8, 9 and 13 in CD<sub>3</sub>OD\***

| <b>C/H Position</b>    | <b>Compound HM 8</b><br>[5,7,4' - trihydroxy-8,3' - dimethoxy flavanone]                                                                       |            | <b>Compound HM 9</b><br>[5,7,4' -trihydroxy-6-methoxy flavanone]                                                                     |            | <b>Compound HM 13</b><br>[3',5',5,7-tetrahydroxy-6-methoxyflavanone]                                                           |            |                 |
|------------------------|------------------------------------------------------------------------------------------------------------------------------------------------|------------|--------------------------------------------------------------------------------------------------------------------------------------|------------|--------------------------------------------------------------------------------------------------------------------------------|------------|-----------------|
|                        | <b><sup>1</sup>H-NMR</b>                                                                                                                       | <b>APT</b> | <b><sup>1</sup>H-NMR</b>                                                                                                             | <b>APT</b> | <b><sup>1</sup>H-NMR</b>                                                                                                       | <b>APT</b> |                 |
| <b>2</b>               | 5.18 (1H, dd, $J_1 = 2.8, J_2 = 12.6$ )                                                                                                        | 79.2       | 5.22 (1H, dd, $J_1 = 2.8, J_2 = 13$ )                                                                                                | 79.2       | 5.16 (1H, dd, $J = 2.8, 12.8$ )                                                                                                | 79.2       | CH              |
| <b>3</b>               | <b>3<math>\alpha</math></b> = 2.56 (1H, dd, $J_1 = 2.8, J_2 = 17.2$ )<br><b>3<math>\beta</math></b> = 2.97 (1H, dd, $J_1 = 12.8, J_2 = 17.2$ ) | 42.7       | <b>3<math>\alpha</math></b> = 2.60 (1H, dd, $J_1 = 2.8, J_2 = 17$ )<br><b>3<math>\beta</math></b> = 3.01 (1H, dd, $J = 12.8, 17.2$ ) | 42.7       | <b>3<math>\alpha</math></b> = 2.60 (1H, dd, $J = 2.8, 17.2$ )<br><b>3<math>\beta</math></b> = 2.96 (1H, dd, $J = 12.8, 17.2$ ) | 42.7       | CH <sub>2</sub> |
| <b>4</b>               | -----                                                                                                                                          | 195.7      | -----                                                                                                                                | 197.2      | -----                                                                                                                          | 197.2      | Q               |
| <b>5</b>               | -----                                                                                                                                          | 159.0      | -----                                                                                                                                | 155.2      | -----                                                                                                                          | 155.2      | Q               |
| <b>6</b>               | 5.79 (1H, s)                                                                                                                                   | 96.3       | -----                                                                                                                                | 129.0      | -----                                                                                                                          | 129.0      | Q               |
| <b>7</b>               | -----                                                                                                                                          | 164.6      | -----                                                                                                                                | 159.4      | -----                                                                                                                          | 159.5      | Q               |
| <b>8</b>               | -----                                                                                                                                          | 130.7      | 5.87 (1H, s)                                                                                                                         | 94.8       | 5.87 (1H, s)                                                                                                                   | 94.8       | CH              |
| <b>9</b>               | -----                                                                                                                                          | 155.0      | -----                                                                                                                                | 157.6      | -----                                                                                                                          | 158.8      | Q               |
| <b>10</b>              | -----                                                                                                                                          | 100.7      | -----                                                                                                                                | 102.1      | -----                                                                                                                          | 102.1      | Q               |
| <b>OCH<sub>3</sub></b> | 3.66 (3H, s)                                                                                                                                   | 59.4       | 3.67 (3H, s)                                                                                                                         | 59.6       | 3.68 (3H, s)                                                                                                                   | 59.6       | CH <sub>3</sub> |
| <b>OCH<sub>3</sub></b> | 3.78 (3H, s)                                                                                                                                   | 55.1       | -----                                                                                                                                | -----      | -----                                                                                                                          | -----      | -----           |
| <b>1'</b>              | -----                                                                                                                                          | 130.1      | -----                                                                                                                                | 129.7      | -----                                                                                                                          | 130.3      | Q               |
| <b>2'</b>              | 6.97 (1H, d, $J = 1.6$ )                                                                                                                       | 109.8      | 7.21 (2H, d, $J = 8.4$ )                                                                                                             | 127.6      | 6.68 (2H, s)                                                                                                                   | 117.9      | CH              |
| <b>3'</b>              | -----                                                                                                                                          | 147.7      | 6.71 (2H, d, $J = 8.8$ )                                                                                                             | 114.9      | -----                                                                                                                          | 145.1      | Q               |
| <b>4'</b>              | -----                                                                                                                                          | 146.6      | -----                                                                                                                                | 158.8      | 6.68 (2H, s)                                                                                                                   | 114.8      | CH              |
| <b>5'</b>              | 6.71 (1H, d, $J = 8$ )                                                                                                                         | 114.7      | 6.71 (2H, d, $J = 8.8$ )                                                                                                             | 114.9      | -----                                                                                                                          | 145.5      | Q               |
| <b>6'</b>              | 6.81 (1H, dd, $J_1 = 8.2, J_2 = 2$ )                                                                                                           | 119.0      | 7.21 (2H, d, $J = 8.4$ )                                                                                                             | 127.6      | 6.81 (1H, s)                                                                                                                   | 113.3      | CH              |

\*  $\delta$  values of compounds **8**, **9** & **13** are expressed in ppm and coupling constants ( $J$ ) in Hz.  $^1\text{H}$ -NMR and APT were measured in  $\text{CD}_3\text{OD}$  at 400 and 100 MHz respectively.

**Table S3: HMBC correlations of compound 13 deduced from HMBC (Figures S34, S35&S39)**

| Proton         | Proton (Values in ppm) | Correlated Carbon (s) (Values in ppm)                                            |
|----------------|------------------------|----------------------------------------------------------------------------------|
| $\text{OCH}_3$ | 3.68                   | 129.0 (C-6)                                                                      |
| H-8            | 5.87                   | 129.0 (C-6), 159.5 (C-7), 158.8 (C-9), 102.1 (C-10)                              |
| H-2'           | 6.68                   | 130.3 (C-1'), 114.8 (C-4'), 145.1 (C-3'), 145.5 (C-5'), 113.3 (C-6'), 79.2 (C-2) |
| H-4'           | 6.68                   | 145.1 (C-3'), 145.5 (C-5')                                                       |
| H-6'           | 6.81                   | 117.9 (C-2'), 145.1 (C-3'), 145.5 (C-5'), 79.2 (C-2)                             |

**Table S4: Results of the SARS-COV-2M<sup>pro</sup> inhibitory activity of the methanolic extract of the leaves of *H. bracteatum* and its fractions compared with the standard lopinavir**

| Extract& Fractions   | <i>In vitro</i> SARS-COV-2M <sup>pro</sup><br>IC <sub>50</sub><br>IC <sub>50</sub> ( $\mu\text{g/ml}$ ) |
|----------------------|---------------------------------------------------------------------------------------------------------|
| Lopinavir (Standard) | 0.141 $\pm$ 0.01                                                                                        |
| Methanolic extract   | 14.47 $\pm$ 0.74                                                                                        |
| Pet. ether fraction  | 3.466 $\pm$ 0.18                                                                                        |
| Methylene fraction   | 16.05 $\pm$ 0.82                                                                                        |
| Ethyl fraction       | 2.589 $\pm$ 0.13                                                                                        |
| Butanol fraction     | 21.9 $\pm$ 1.12                                                                                         |

**Table S5: The SARS-COV-2M<sup>pro</sup>inhibition (IC<sub>50</sub> μM), docking scores<sup>a</sup> and type of binding interactions of the isolated compounds (1-18) and the standard compound (lopinavir)**

| Comp-<br>Ound<br>(code) | Compounds (name)                                                | <i>In vitro</i> SARS<br>-COV-2<br>M <sup>pro</sup> IC <sub>50</sub><br>μM IC <sub>50</sub><br>(μmole) | Binding<br>energy<br>(kcal/m<br>ol)<br>(dockin<br>g score) | Type of binding interactions                                 |
|-------------------------|-----------------------------------------------------------------|-------------------------------------------------------------------------------------------------------|------------------------------------------------------------|--------------------------------------------------------------|
| <b>Stand-<br/>ard</b>   | <b>Lopinavir</b>                                                | <b>0.225±0.01</b>                                                                                     | -9.61                                                      | H-bond with Glu 166 & Gln 189                                |
| <b>1</b>                | 24-β-ethyl-cholesta-5(6),22(23),25(26)-triene-3-ol              | 12.51±0.64                                                                                            | -9.99                                                      | H-bond with Glu 166 & Phe 140                                |
| <b>2</b>                | α-amyrin                                                        | 4.185±0.21                                                                                            | -10.29                                                     | H-bond with Glu 166                                          |
| <b>3</b>                | Linoleic acid                                                   | 20.67±1.05                                                                                            | -10.39                                                     | H-bond with Thr 190 & Arg 188                                |
| <b>4</b>                | 24-β-ethyl-cholesta-5(6),22(23),25(26)-triene-3-O-β-D-glucoside | 89.99±4.59                                                                                            | -11.92                                                     | Three H-bonds with Gln 189                                   |
| <b>5</b>                | 1,3-propanediol-2-amino-1-(3',4'-methylene dioxypheyl)          | 8.532±0.43                                                                                            | -8.97                                                      | -Two H-bonds with Gln 189<br>- H-bond with Glu 166 & Gln 192 |
| <b>6</b>                | (-)-(7R,8R,8'R)-acuminatolide                                   | 0.917±0.05                                                                                            | -9.39                                                      | H-bond with Glu 166 & Ser 144                                |
| <b>7</b>                | (+)-piperitol                                                   | 16.31±0.83                                                                                            | -12.34                                                     | H-bond with Glu 166, Ser 46, Thr 25 & Thr 45                 |
| <b>8</b>                | 5,7,4'-trihydroxy-8,3'-                                         | 27.86±1.42                                                                                            | -12.69                                                     | H-bond with Glu 166, Gly                                     |

|           |                                                         |            |        |                                                                       |
|-----------|---------------------------------------------------------|------------|--------|-----------------------------------------------------------------------|
|           | dimethoxy flavanone                                     |            |        | 143 & Leu 141                                                         |
| <b>9</b>  | 5,7,4'-trihydroxy-6-methoxy flavanone                   | 11.83±0.6  | -11.49 | -H-bond with Glu 166, Gly 143 & Ser 144<br>-Two H-bonds with His 163  |
| <b>10</b> | 4',5-dihydroxy-3',7,8-trimethoxyflavone                 | 12.83±0.65 | -13.45 | -H-bond with Glu 166 & Leu 141<br>- Two H-bonds with Gly 143          |
| <b>11</b> | 5,7-dihydroxy- 3',4',5',8-tetramethoxy flavone          | 5.069±0.26 | -12.48 | H-bond with Glu 166, Cys 145, Gly 143 & Ser 144                       |
| <b>12</b> | 1,3-propanediol-2-amino-1-(4'-hydroxy-3'-methoxyphenyl) | 0.476±0.02 | -10.79 | -Two H-bonds with Glu 166<br>- H-bond with Gln 189, Thr 190 & Arg 188 |
| <b>13</b> | 3',5',5,7-tetrahydroxy-6-methoxyflavanone               | 5.565±0.28 | -12.81 | H-bond with Glu 166, His 163 & Leu 167                                |

|           |                                                    |            |        |                                                                                                      |
|-----------|----------------------------------------------------|------------|--------|------------------------------------------------------------------------------------------------------|
| <b>14</b> | Simplexoside (piperitol-O- $\beta$ -D-glucoside)   | 0.61±0.03  | -12.96 | -H-bond with Gln 189, Glu 166, Thr 26, Thr 24 & Ser 46<br>-Two H-bonds with Gly 143                  |
| <b>15</b> | Pinoresinol monomethyl ether- $\beta$ -D-glucoside | 11.46±0.58 | -11.69 | -Three H- bonds with Glu 166<br>-Two H-bonds with Thr 190<br>- H-bond with Gln 192, Thr 26 & Arg 188 |
| <b>16</b> | Orientin                                           | 27.5±1.4   | -14.34 | -Two H-bonds with Glu 166<br>- H-bond with His 163 & Arg 188                                         |
| <b>17</b> | Luteolin 3'-O- $\beta$ -D-glucoside                | 10.12±0.52 | -15.61 | -Two H-bonds with Glu 166<br>- H-bond with His 163, Phe 140, Thr 24 & Thr 25                         |
| <b>18</b> | 3,5-dicaffeoylquinic acid                          | 4.74±0.24  | -16.24 | -H-bond with Glu 166, Gln 189, Leu 141 & Thr 25                                                      |

[a] Docking was performed using MOE 2009.10 towards the active site of M<sup>pro</sup> (code: 6LU7)

[b] All data are presented as mean value  $\pm$  SD for three independent experiments.

[c] Lopinavir was used as a positive control.

**Table S6: 2D binding mode and residues involved in the recognition of the standard lopinavir and the isolated compounds docked and minimized in the SARS-COV-2M<sup>pro</sup> binding pocket**

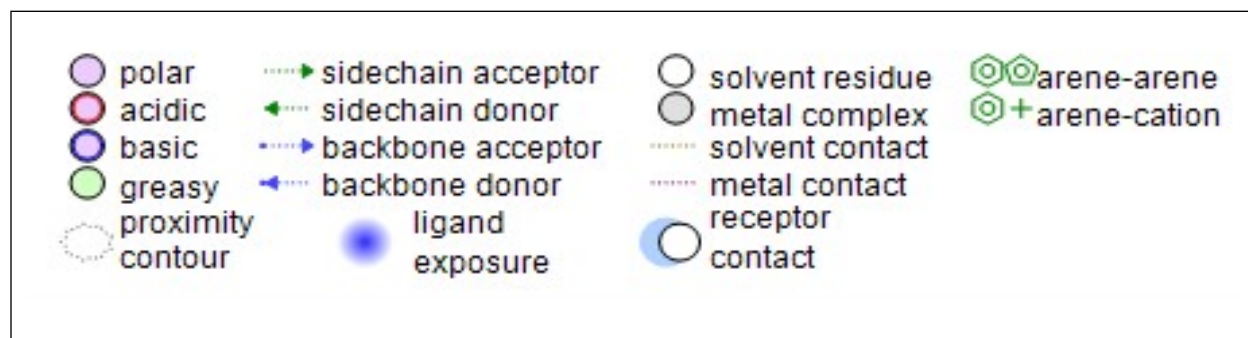

| Code | 2D binding mode and residues |
|------|------------------------------|
|------|------------------------------|

|                       |                                                                                                                                                                       |
|-----------------------|-----------------------------------------------------------------------------------------------------------------------------------------------------------------------|
| <p>Stan-<br/>dard</p> | <p><b>Lopinavir</b></p> 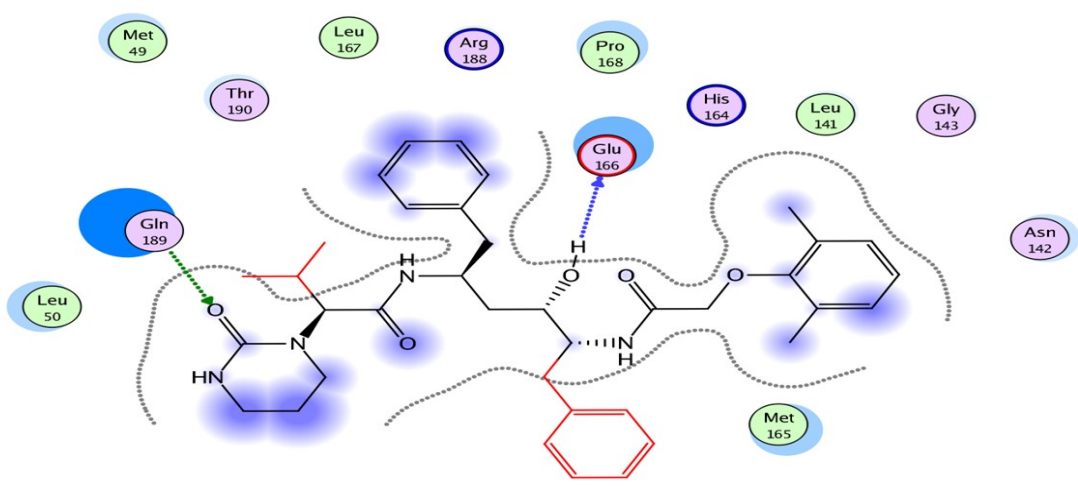                                                            |
| <p>1</p>              | <p><b>24-<math>\beta</math>-ethyl-cholesta-5(6),22(23),25(26)-triene-3-ol</b></p> 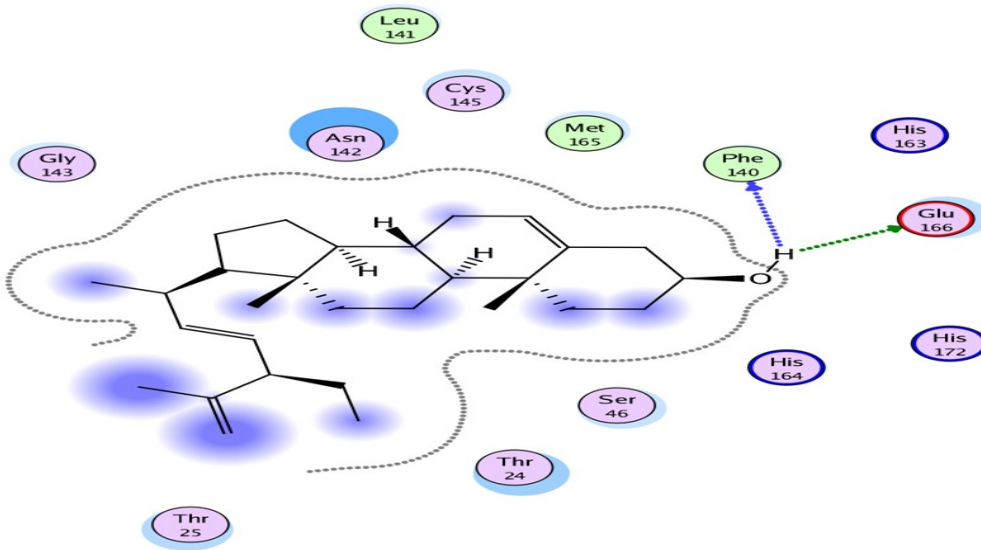 |
| <p>2</p>              | <p><b><math>\alpha</math>-amyrin</b></p> 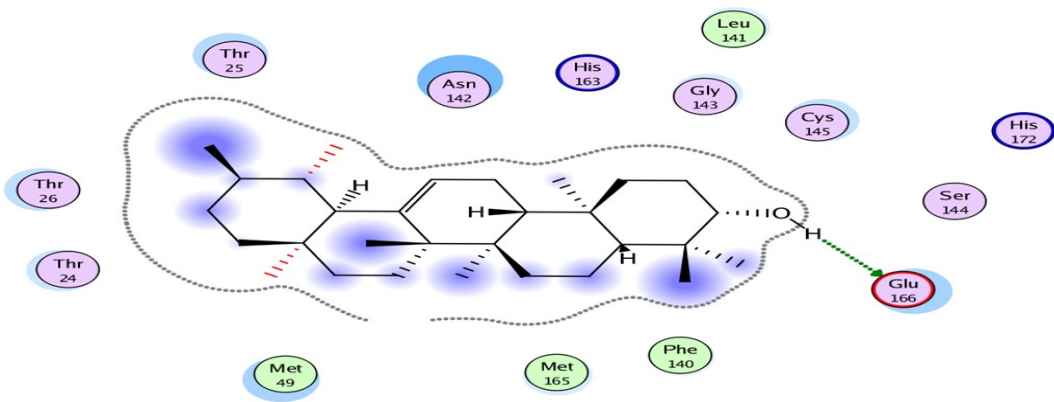                                         |

|   |                                                                                                                                                                                                     |
|---|-----------------------------------------------------------------------------------------------------------------------------------------------------------------------------------------------------|
| 3 | <p><b>Linoleic acid</b></p> 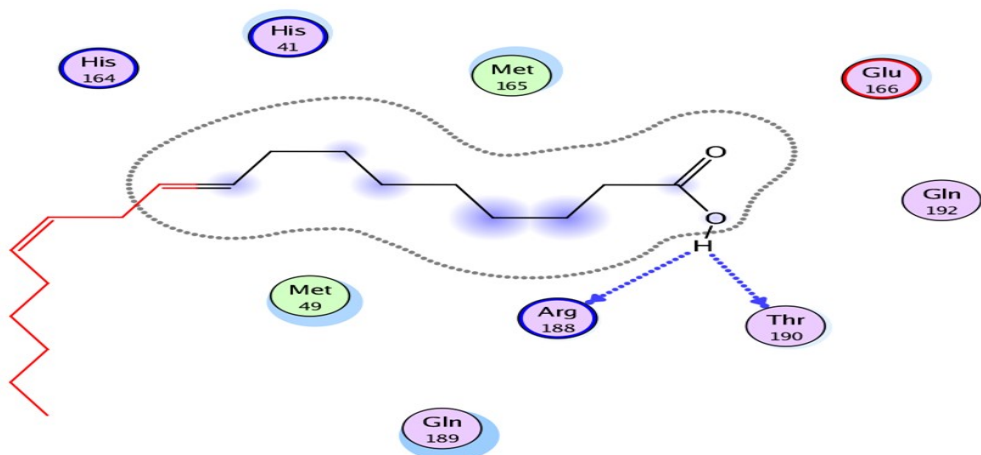                                                                                      |
| 4 | <p><b>24-<math>\beta</math>-ethyl-cholesta-5(6),22(23),25(26)-triene-3-O-<math>\beta</math>-D-glucoside</b></p> 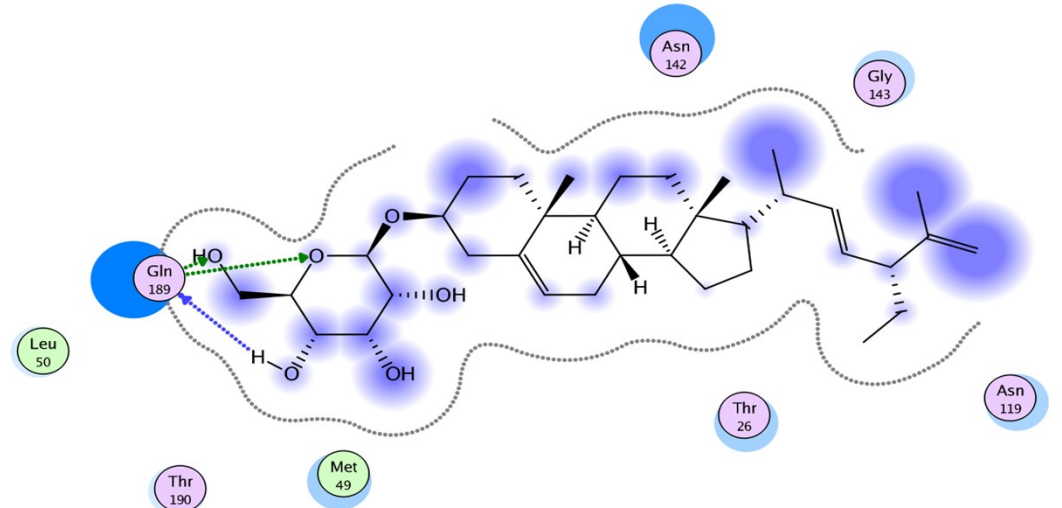 |
| 5 | <p><b>1,3-propanediol-2-amino-1-(3',4'-methylenedioxyphenyl)</b></p> 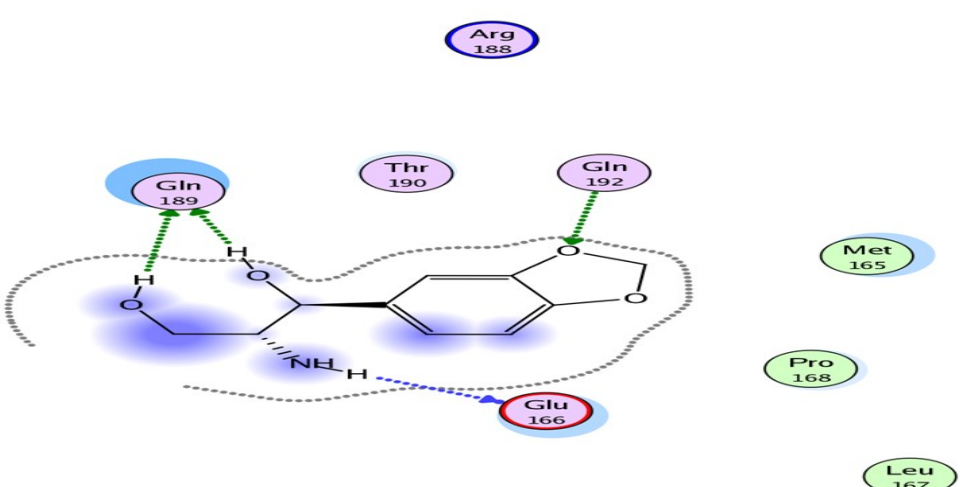                                           |

|   |                                                                                                                                                     |
|---|-----------------------------------------------------------------------------------------------------------------------------------------------------|
| 6 | <p><b>(-)-(7<i>R</i>,8<i>R</i>,8'<i>R</i>)-acuminatolide</b></p> 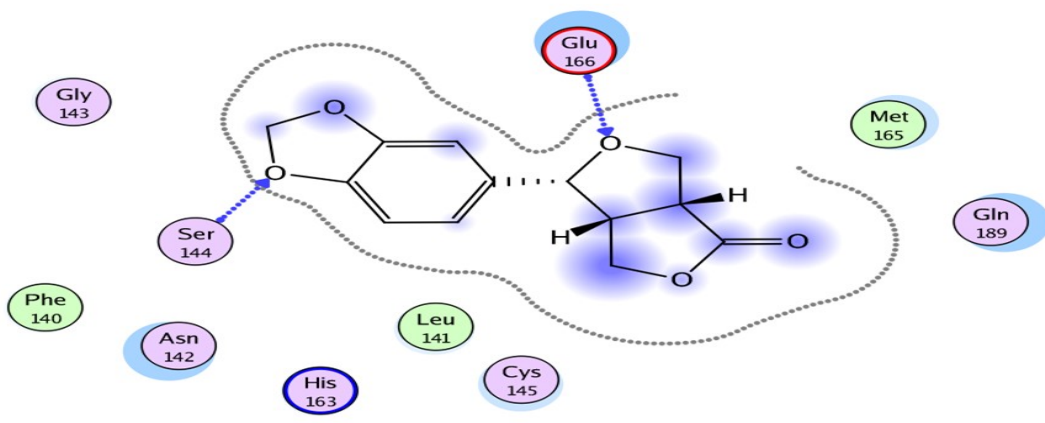 |
| 7 | <p><b>(+)-piperitol</b></p> 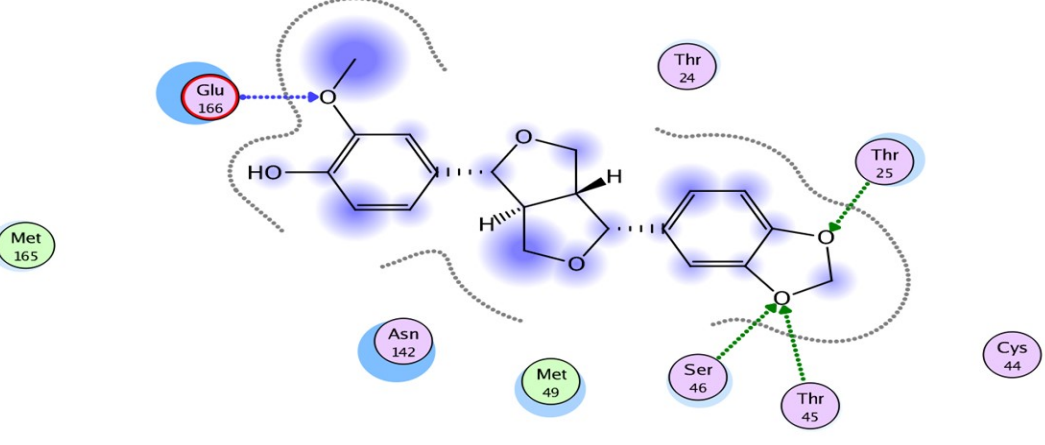                                     |
| 8 | <p><b>5,7,4'-trihydroxy- 8,3'-dimethoxy flavanone</b></p> 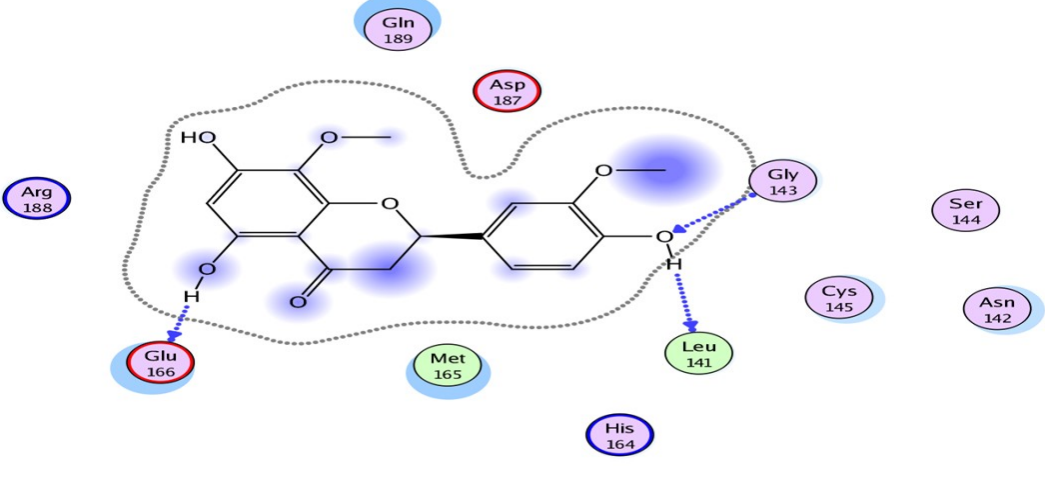      |

|    |                                                                                                                                                  |
|----|--------------------------------------------------------------------------------------------------------------------------------------------------|
| 9  | <p><b>5,7,4'-trihydroxy-6-methoxy flavanone</b></p> 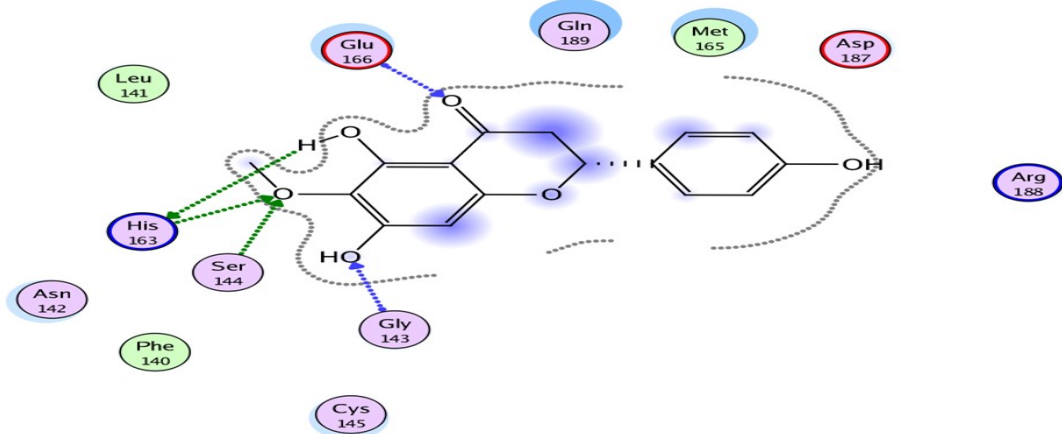           |
| 10 | <p><b>4',5-dihydroxy-3',7,8-trimethoxyflavone</b></p> 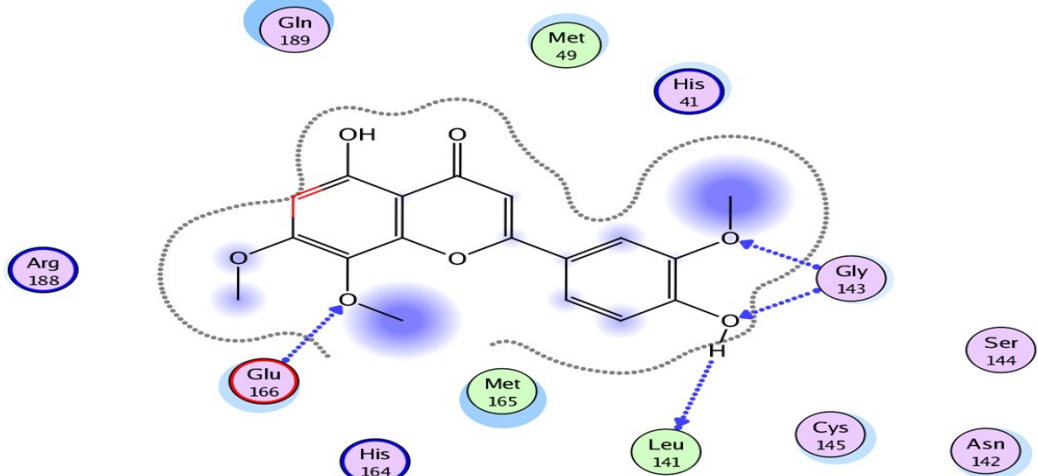        |
| 11 | <p><b>5,7-dihydroxy-3',4',5',8-tetramethoxy flavone</b></p> 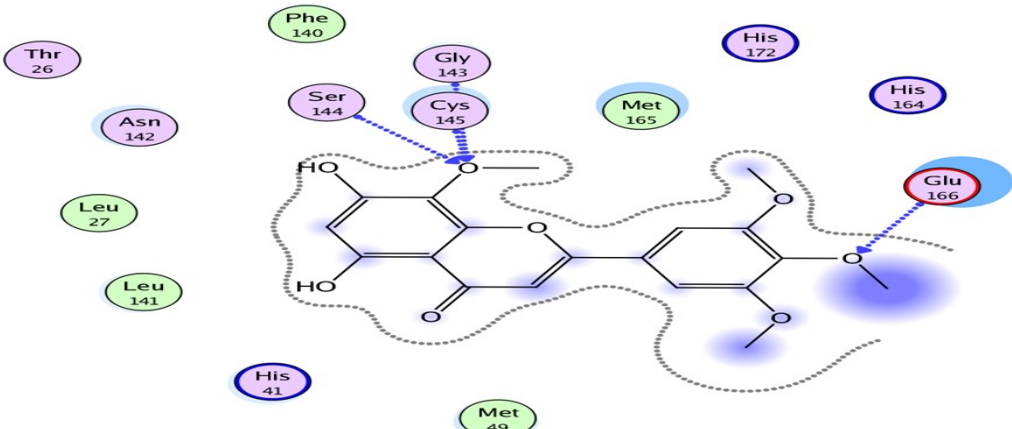 |

|    |                                                                                                                                                       |
|----|-------------------------------------------------------------------------------------------------------------------------------------------------------|
| 12 | <p>1,3-propanediol-2-amino-1-(4'-hydroxy-3'-methoxyphenyl)</p> 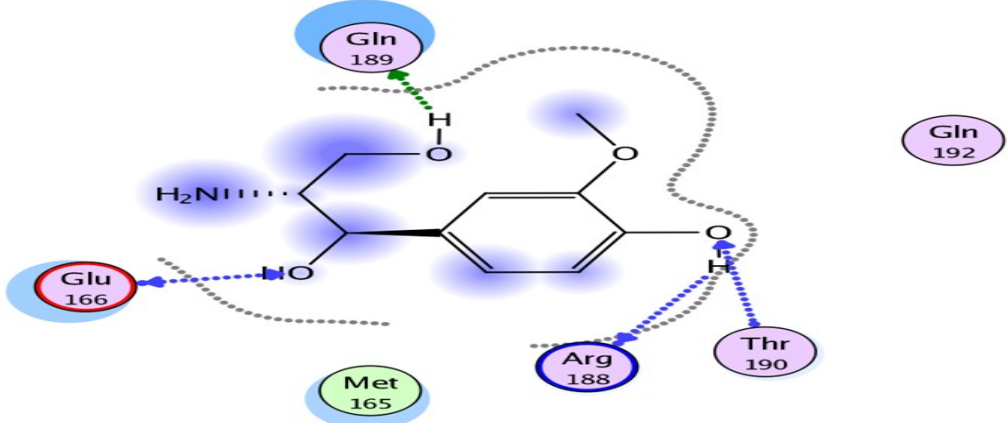     |
| 13 | <p>3',5',5,7-tetrahydroxy-6-methoxyflavanone</p> 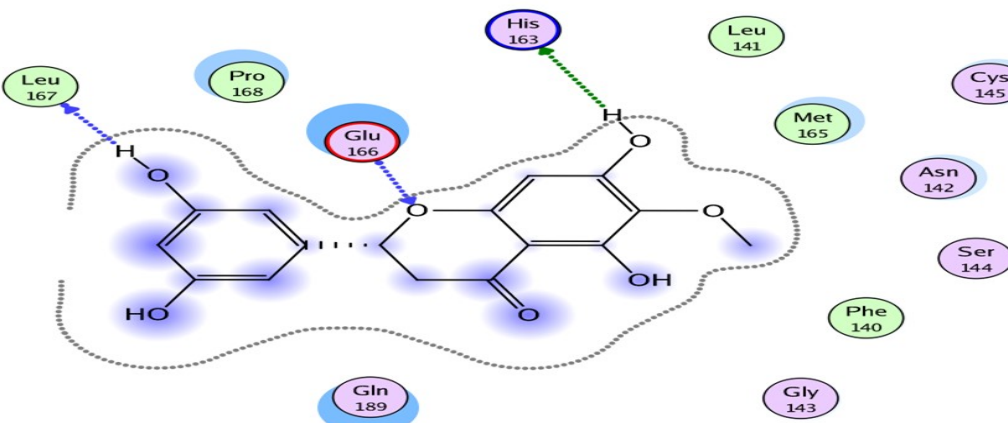                  |
| 14 | <p>Simplexoside (piperitol-O-<math>\beta</math>-D-glucoside)</p> 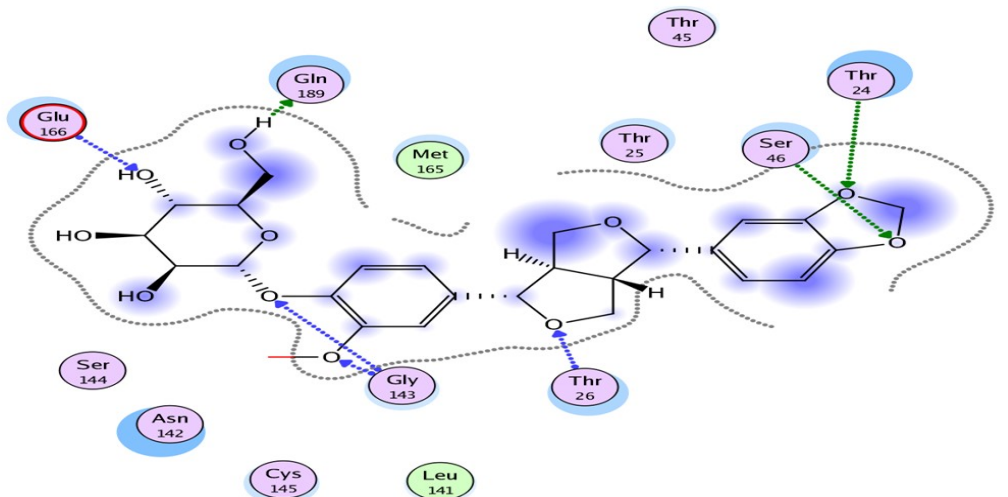 |

|    |                                                                                                                                                              |
|----|--------------------------------------------------------------------------------------------------------------------------------------------------------------|
| 15 | <p><b>Pinoresinol monomethyl ether-<math>\beta</math>-D-glucoside</b></p> 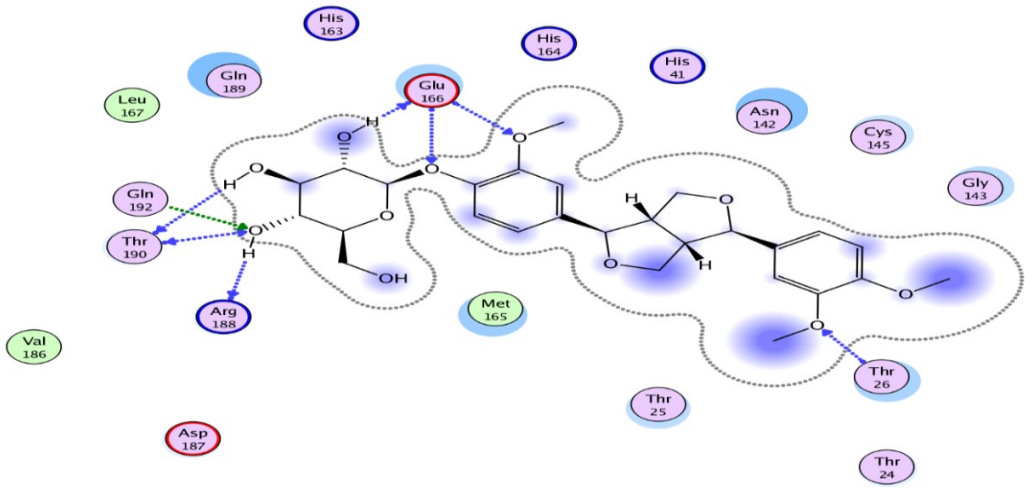 |
| 16 | <p><b>Orientin</b></p> 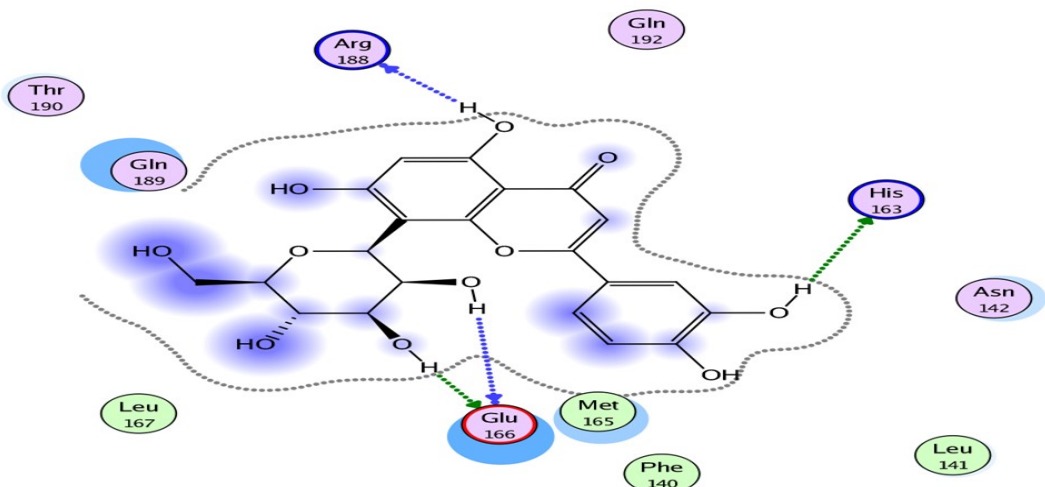                                                   |
| 17 | <p><b>Luteolin-3'-O-<math>\beta</math>-D-glucoside</b></p> 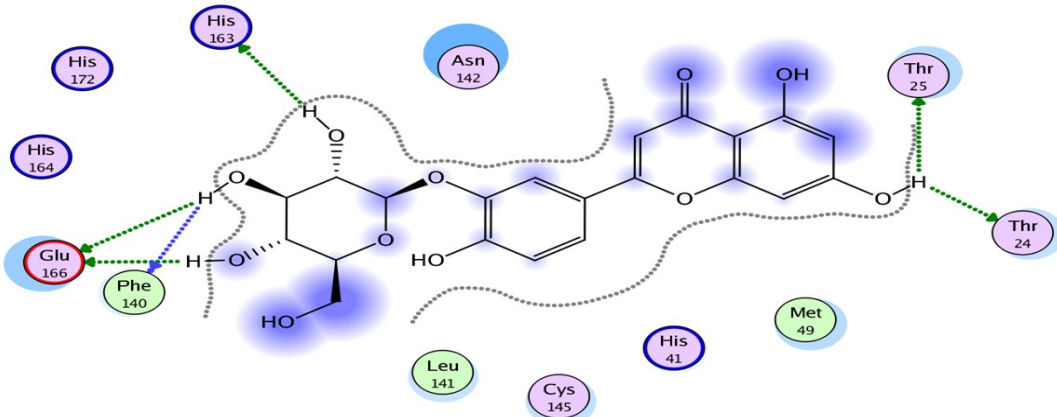              |

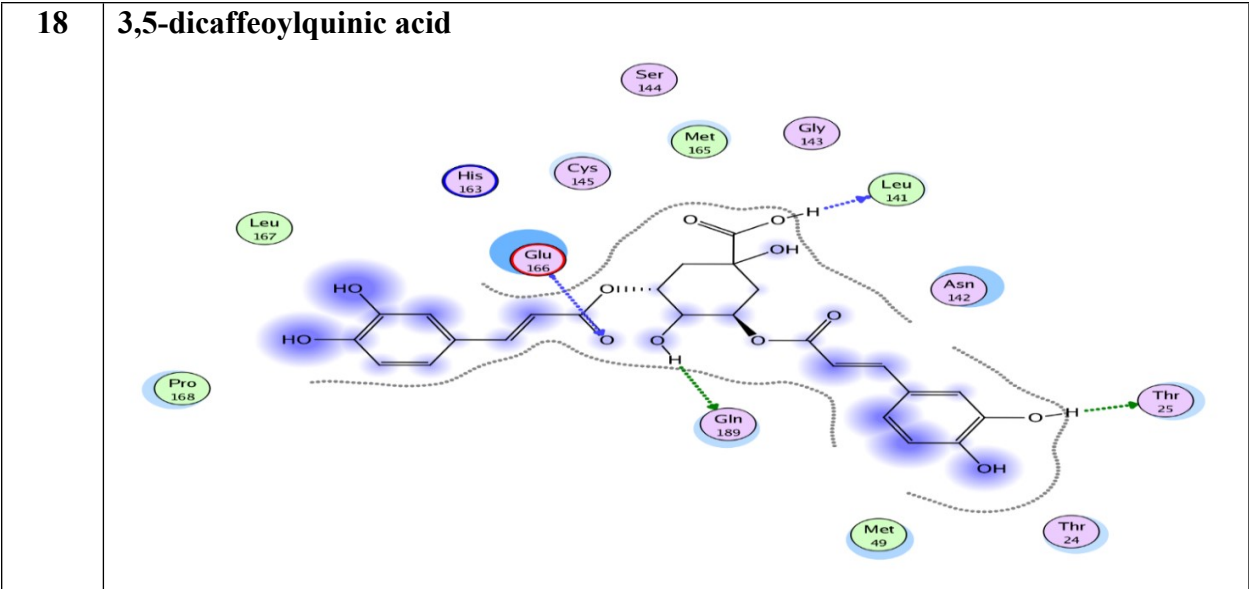

**Table (S7): A) 3D binding mode and residues involved in the recognition the standard lopinavir and the isolated compounds docked and minimized in the SARS-COV-2M<sup>pro</sup>binding pocket**

**B) Surface and maps of the isolated compound compared to the standard lopinavir**

| No.      | Name of compounds | A | B |
|----------|-------------------|---|---|
| Standard | Lopinavir         |   |   |

|   |                                                            |                                                                                      |                                                                                       |
|---|------------------------------------------------------------|--------------------------------------------------------------------------------------|---------------------------------------------------------------------------------------|
| 1 | 24- $\beta$ -ethyl-cholesta-5(6),22(23),25(26)-triene-3-ol | 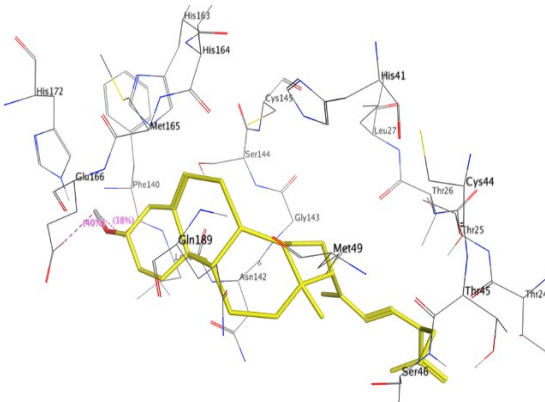   | 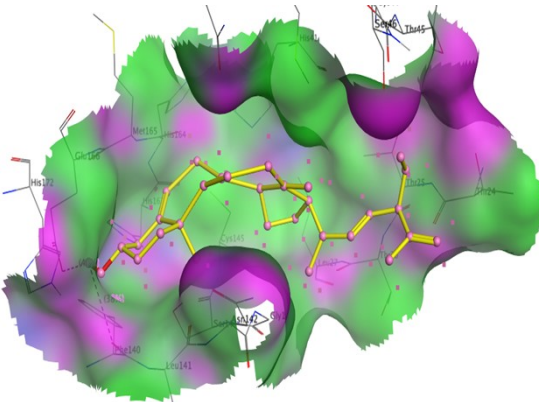   |
| 2 | $\alpha$ -amyrin                                           | 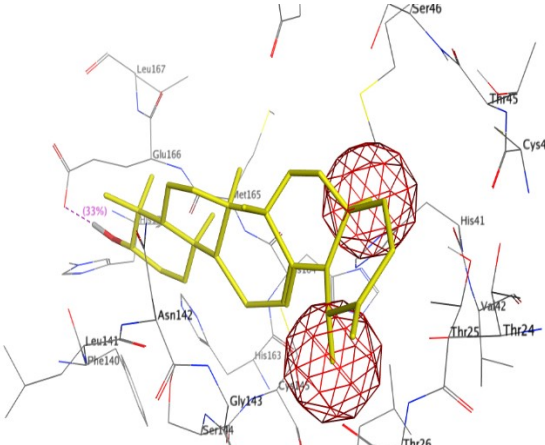  | 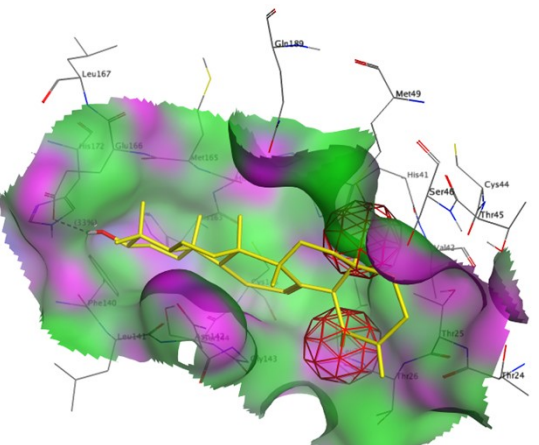  |
| 3 | Linoleic acid                                              | 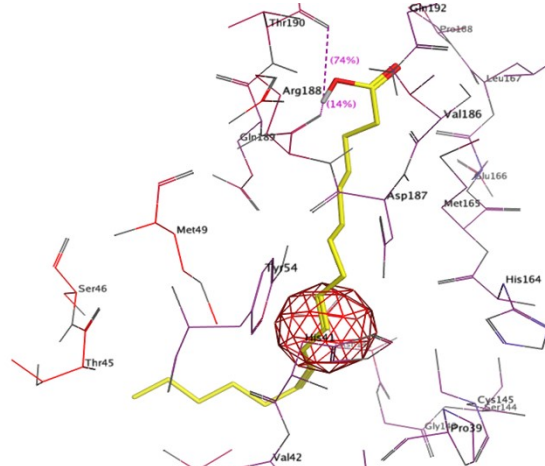 | 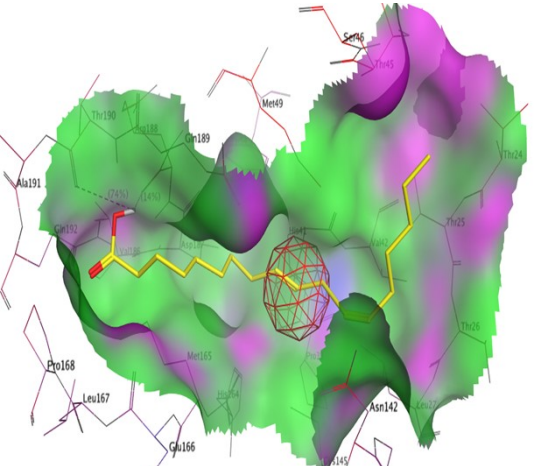 |

|   |                                                                                 |                                                                                      |                                                                                       |
|---|---------------------------------------------------------------------------------|--------------------------------------------------------------------------------------|---------------------------------------------------------------------------------------|
| 4 | 24- $\beta$ -ethyl-cholesta-5(6),22(23),25(26)-triene-3-O- $\beta$ -D-glucoside | 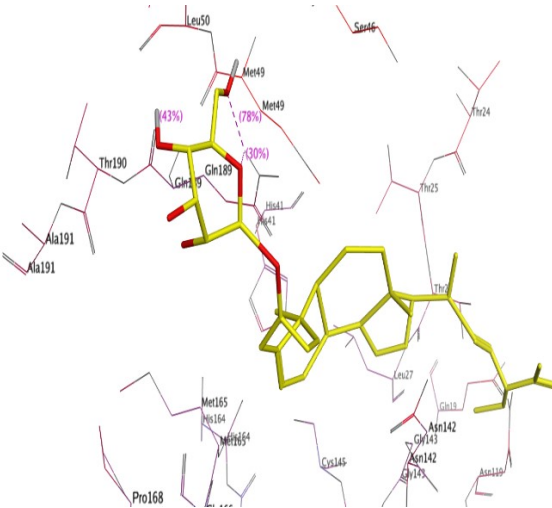   | 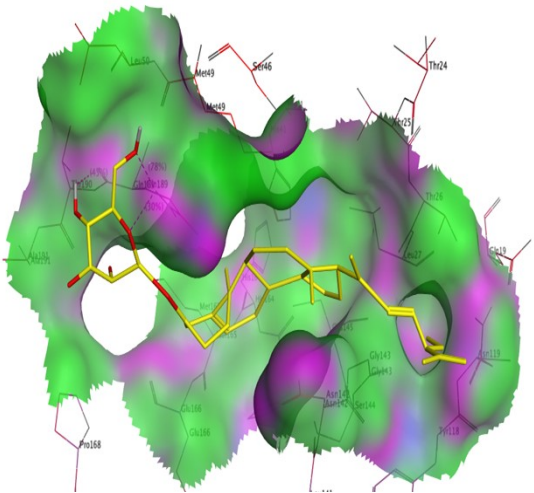   |
| 5 | 1,3-propanediol-2-amino-1-(3',4'-methylenedioxyphenyl)                          | 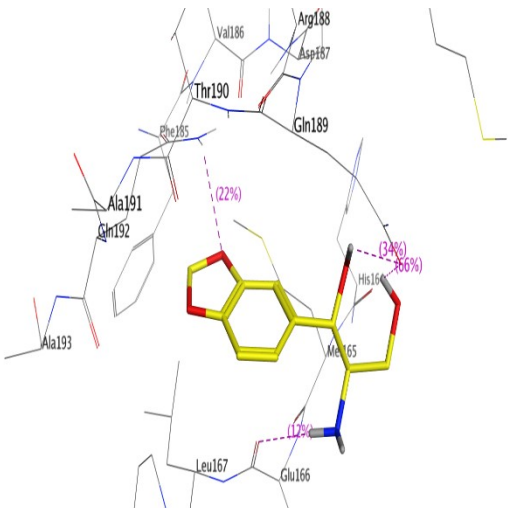  | 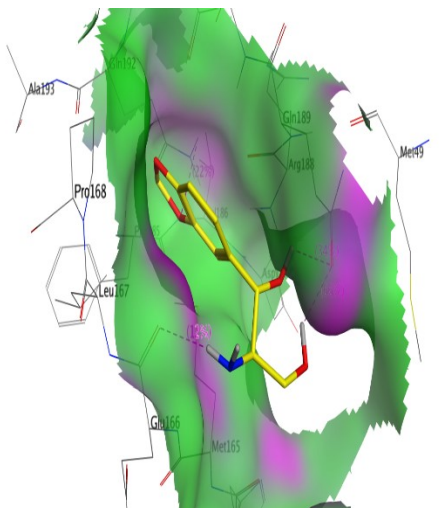  |
| 6 | (-)-(7 <i>R</i> ,8 <i>R</i> ,8' <i>R</i> )-acuminatolide                        | 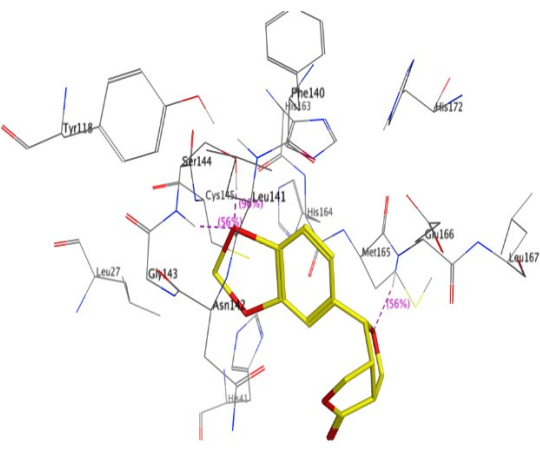 | 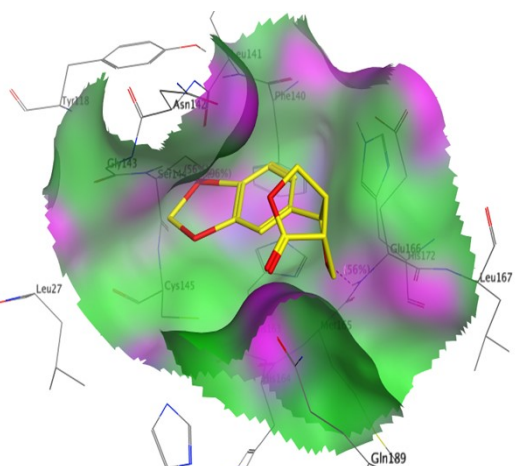 |

|   |                                                   |  |  |
|---|---------------------------------------------------|--|--|
| 7 | <b>(+)-piperitol</b>                              |  |  |
| 8 | <b>5,7,4'-trihydroxy-8,3'-dimethoxy flavanone</b> |  |  |
| 9 | <b>5,7,4'-trihydroxy-6-methoxy flavanone</b>      |  |  |

|    |                                                         |                                                                                      |                                                                                       |
|----|---------------------------------------------------------|--------------------------------------------------------------------------------------|---------------------------------------------------------------------------------------|
| 10 | 4',5-dihydroxy-3',7,8-trimethoxyflavone                 | 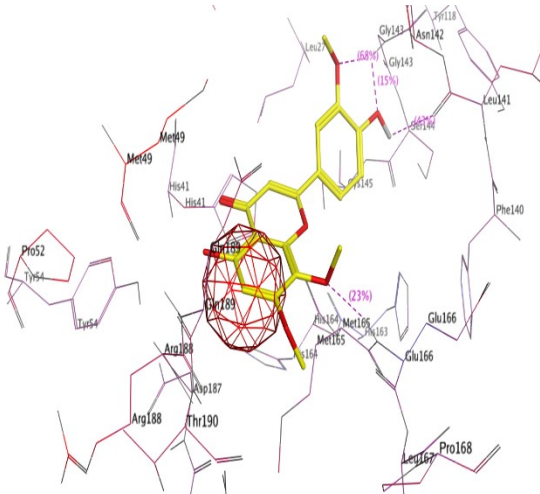   | 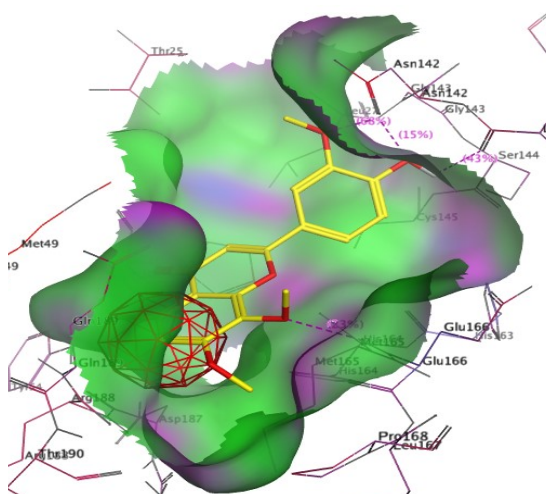   |
| 11 | 5,7-dihydroxy-3',4',5',8-tetramethoxy flavone           | 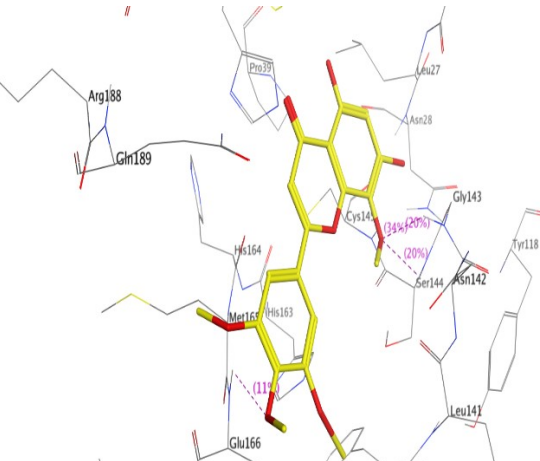  | 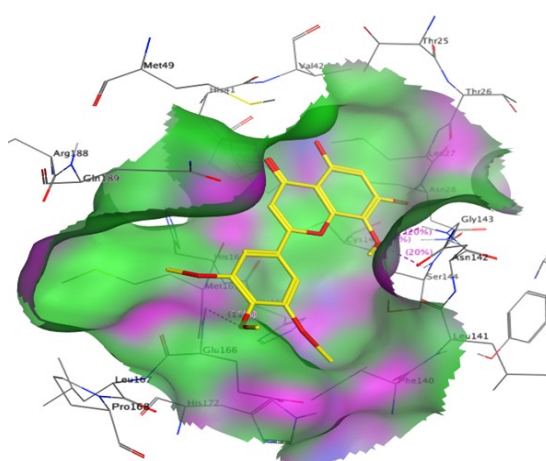  |
| 12 | 1,3-propanediol-2-amino-1-(4'-hydroxy-3'-methoxyphenyl) | 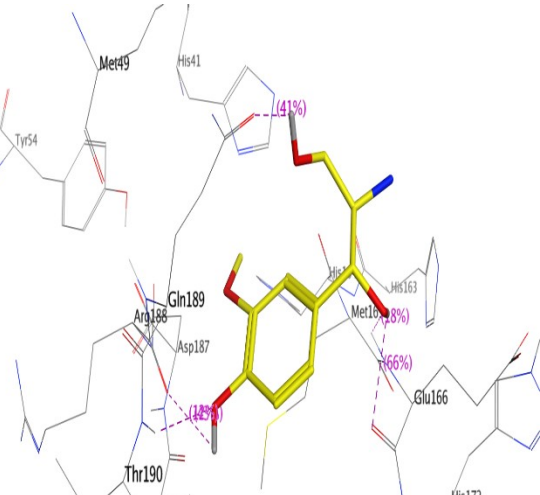 | 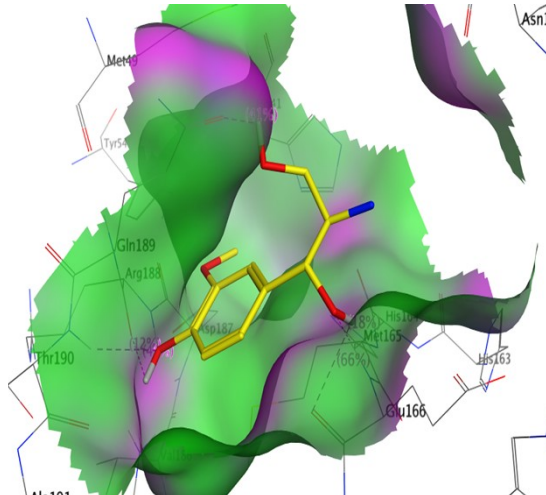 |



|    |                                                     |  |  |
|----|-----------------------------------------------------|--|--|
| 16 | <b>Orientin</b>                                     |  |  |
| 17 | <b>Luteolin-3'-O-<math>\beta</math>-D-glucoside</b> |  |  |
| 18 | <b>3,5-dicaffeoylquinic acid</b>                    |  |  |

## Data S1

**Compound 1** (24- $\beta$ -ethyl-cholesta-5(6),22(23),25(26)-triene-3-ol) was obtained as white powder.

$^1\text{H}$  NMR ( $\text{CDCl}_3$ , 400 MHz): 3.49 (m, H-3), 5.32 (1H, d,  $J$ = 5.2 Hz, H-6), 0.67 (s, H-18), 0.99 (br s, H-19), 0.98 (br s, H-21), 5.22 (1H, dd,  $J$ = 15.2 & 8 Hz, H-22), 5.13 (1H, dd,  $J$ = 15.2 & 8 Hz, H-23), 4.67-4.69 (2H, m, H-26), 1.62 (s, H-27), 0.82 (1H, d,  $J$ = 7.6 Hz, H-29). DEPT Q ( $\text{CDCl}_3$ , 100 MHz): 37.3 (C-1), 31.7 (C-2), 71.8 (C-3), 39.8 (C-4), 140.8 (C-5), 121.7 (C-6), 31.9 (C-7), 31.9 (C-8), 50.1 (C-9), 36.5 (C-10), 21.1 (C-11), 39.7 (C-12), 42.3 (C-13), 56.9 (C-14), 24.3 (C-15), 28.7 (C-16), 55.9 (C-17), 12.1 (C-18), 19.4 (C-19), 40.2 (C-20), 20.8 (C-21), 137.2 (C-22), 130.0 (C-23), 52.0 (C-24), 148.7 (C-25), 109.5 (C-26), 20.3 (C-27), 25.7 (C-28), 12.2 (C-29).

**Compound 2** ( $\alpha$ -amyirin) was obtained as oily substance.  $^1\text{H}$  NMR ( $\text{CDCl}_3$ , 400 MHz): 3.15 (m, H-3), 5.11 (t, H-12), 0.94 (s, 3H, H-23), 0.85 (s, 3H, H-24), 0.79 (m, H-25), 0.89 (s, 3H, H-26), 1.00 (s, 3H, H-27), 0.93 (s, 3H, H-28), 0.89 (s, 3H, H-29), 0.73 (s, 3H, H-30). APT ( $\text{CDCl}_3$ , 100 MHz): 38.8 (C-1), 27.3 (C-2), 77.4 (C-3), 38.5 (C-4), 55.2 (C-5), 18.4 (C-6), 32.9 (C-7), 40.0 (C-

8), 47.7 (C-9), 36.8 (C-10), 23.4 (C-11), 124.4 (C-12), 139.6 (C-13), 42.0 (C-14), 29.4 (C-15), 26.6 (C-16), 33.8 (C-17), 59.1 (C-18), 39.7 (C-19), 39.6 (C-20), 31.3 (C-21), 41.5 (C-22), 28.8 (C-23), 15.7 (C-24), 15.6 (C-25), 16.9 (C-26), 23.4 (C-27), 28.2 (C-28), 17.5 (C-29), 21.4 (C-30).

**Compound 3** (linoleic acid) was obtained as white powder.  $^1\text{H}$  NMR ( $\text{CDCl}_3$ , 400 MHz): 2.32 (H-2), 1.61 (H-3), 1.29 (H-4), 1.29 (H-7), 2.07 (H-8), 5.34 (H-9,10), 2.78 (H-11), 5.34 (H-12,13), 1.29 (H-15&17), 0.97 (H-18). APT ( $\text{CDCl}_3$ , 100 MHz): 179.1 (C-1), 33.9 (C-2), 24.7 (C-3), 29.0 (C-4), 29.3 (C-5), 29.6 (C-6), 29.7 (C-7), 27.2 (C-8), 130.3 (C-9), 128.3 (C-10), 25.5 (C-11), 130.1 (C-12), 127.9 (C-13), 25.6 (C-14), 29.4 (C-15), 31.9 (C-16), 22.7 (C-17), 14.3 (C-18).

**Compound 4** (24- $\beta$ -ethyl-cholesta-5(6),22(23),25(26)-triene-3-O- $\beta$ -D-glucoside) was obtained as white powder.  $^1\text{H}$  NMR ( $\text{DMSO}-d_6$ , 400 MHz): 3.66 (m, H-3), 5.34 (m, H-6), 0.68 (s, H-18), 0.99 (s, H-19), 0.97 (s, H-21), 5.28-5.14 (m, H-22,23), 4.91 (m, H-26), 1.62 (s, H-27), 0.80 (s, H-29), 5.03 (d,  $J=8.8$  Hz, H-1'), 4.24 (d,  $J=7.6$  Hz, H-2'), 4.70 (m, H-3', 4'), 3.66 (m, H-5'), 4.46 (t,  $J=11.2$  Hz, 5.6 Hz, H-6'a), 4.70 (m, H-6'b). APT ( $\text{DMSO}-d_6$ , 100 MHz): 37.3 (C-1), 29.7 (C-2), 77.2 (C-3), 42.3 (C-4), 140.9 (C-5), 121.7 (C-6), 31.9 (C-7&8), 50.1 (C-9), 36.7 (C-10), 21.1 (C-11), 38.7 (C-12), 42.3 (C-13), 56.7 (C-14), 24.3 (C-15), 28.8 (C-16), 55.7 (C-17), 12.3 (C-18), 19.6 (C-19), 40.6 (C-20), 21.2 (C-21), 137.3 (C-22), 130.0 (C-23), 51.7 (C-24), 148.2 (C-25), 110.5 (C-26), 20.4 (C-27), 25.7 (C-28), 12.5 (C-29), 101.2 (C-1'), 73.9 (C-2'), 77.4 (C-3'), 70.6 (C-4'), 77.2 (C-5'), 61.6 (C-6').

**Compound 5** (1,3-propanediol-2-amino-1-(3',4'-methylenedioxyphenyl) or (1',3'-propanediol-2'-amino-1'-(1,3-benzodioxol-5-yl)) was obtained as white powder.  $^1\text{H}$  NMR ( $\text{CDCl}_3$ , 400 MHz): 4.72 (d, 1H,  $J=3.2$  Hz, H-1), 3.05 (m, 1H, H-2), 4.23 (dd, 1H,  $J=6.4$  Hz, 8.4 Hz, H-3a), 3.87 (dd, 1H,  $J=6.8$  Hz, 2 Hz, H-3b), 6.85 (br s, 1H, H-2'), 6.78 (br d, 1H,  $J=8$ , H-5'), 6.80 (br d, 1H,  $J=10.8$ , H-6'), 5.95 (s, 2H,  $\text{OCH}_2\text{O}$ ). APT ( $\text{CDCl}_3$ , 100 MHz): 85.8 (C-1), 54.3 (C-2), 71.7 (C-3), 135.0 (C-1'), 106.5 (C-2'), 148.0 (C-3'), 147.1 (C-4'), 108.2 (C-5'), 119.4 (C-6'), 101.1 ( $\text{OCH}_2\text{O}$ ).

**Compound 6** ((-)-(7*R*,8*R*,8'*R*)-acuminatolide) was obtained as white powder.  $^1\text{H}$  NMR ( $\text{CDCl}_3$ , 400 MHz): 6.84& 6.79 (br. s, 3H aromatic), 5.97 (s, 2H,  $\text{OCH}_2\text{O}$ ), 4.60 (d, 1H,  $J_{7,8}=6.8$  Hz, H-7), 3.06-3.11 (m, 1H, H-8), 3.44 (ddd, 1H,  $J_{7,8}=3.6$  Hz,  $J_{8',9'\text{eq}}=3.6$  Hz,  $J_{8',8}=3.6$  Hz, H-8'), 4.49 (dd, 1H,  $J_{9\text{eq},9\text{ax}}=6.8$ ,  $J_{8,9\text{eq}}=6.8$ , H-9eq), 4.38-4.31 (m, 2H, H-9ax & H-9'ax), 4.19 (dd, 1H,  $J_{9'\text{eq},9'\text{ax}}=3.6$ ,  $J_{8',9'\text{eq}}=3.6$ , H-9'eq). APT ( $\text{CDCl}_3$ , 100 MHz): 132.7 (C-1), 106.4 (C-2), 148.2 (C-3), 147.8 (C-4), 108.4 (C-5), 119.7 (C-6), 101.3 ( $\text{OCH}_2\text{O}$ ), 86.1 (C-7), 178.1 (C-7'), 48.4 (C-8), 46.0 (C-8'), 70.1 (C-9), 69.8 (C-9').

**Compound 7** ((+)-piperitol) was obtained as white powder.  $^1\text{H}$  NMR ( $\text{CDCl}_3$ , 400 MHz): 6.77-6.89 (6H, m, Ar-H), 5.95 (s, 2H,  $\text{OCH}_2\text{O}$ ), 3.89 (s, 3H,  $\text{OCH}_3$ ) 5.68 (s, 1H, 4'-OH), 4.73 (2H, d,  $J=2$ , H-7&7'), 3.03-3.12 (2H, m, H-8&8'), 4.21-4.27 (2H, m, H-9a&9'a), 3.86-3.89 (2H, m, H-9b&9'b). APT ( $\text{CDCl}_3$ , 100 MHz): 135.1 (C-1), 106.5 (C-2), 147.9 (C-3), 147.1 (C-4), 108.6 (C-5),

119.4 (C-6), 101.1 (OCH<sub>2</sub>O), 132.9 (C-1'), 108.2 (C-2'), 146.7 (C-3'), 145.3 (C-4'), 114.3 (C-5'), 118.9 (C-6'), 55.9 (OCH<sub>3</sub>), 85.9 (C-7), 85.8 (C-7'), 54.3 (C-8), 54.2 (C-8'), 71.7 (C-9&9').

**Compound 8** (5,7,4'-trihydroxy-8,3'-dimethoxyflavanone) was obtained as yellowish white powder. <sup>1</sup>H NMR (CD<sub>3</sub>OD, 400 MHz): 5.18 (1H, dd, *J* = 2.8 Hz, 12.6 Hz, H-2), 2.56 (1H, dd, *J* = 2.8 Hz, 17.2 Hz, H-3α), 2.97 (1H, dd, *J* = 12.8 Hz, 17.2 Hz, H-3β), 5.79 (s, 1H, H-6), 3.66 (s, 3H, R<sub>4</sub>), 3.78 (s, 3H, R<sub>5</sub>), 6.97 (1H, d, *J* = 1.6 Hz, H-2'), 6.71 (1H, d, *J* = 8 Hz, H-5'), 6.81 (1H, dd, *J* = 8.2 Hz, 2 Hz, H-6'). APT (CD<sub>3</sub>OD, 100 MHz): 79.2 (C-2), 42.7 (C-3), 195.7 (C-4), 159.0 (C-5), 96.3 (C-6), 164.6 (C-7), 130.7 (C-8), 155.0 (C-9), 100.7 (C-10), 59.4 (R<sub>4</sub>), 55.1 (R<sub>5</sub>), 130.1 (C-1'), 109.8 (C-2'), 147.7 (C-3'), 146.6 (C-4'), 114.7 (C-5'), 119.0 (C-6').

**Compound 9** (5,7,4'-trihydroxy-6-methoxy flavanone) was obtained as yellowish white powder. <sup>1</sup>H NMR (CD<sub>3</sub>OD, 400 MHz): 5.22 (1H, dd, *J* = 2.8 Hz, 13 Hz, H-2), 2.60 (1H, dd, *J* = 2.8 Hz, 17 Hz, H-3α), 3.01 (1H, dd, *J* = 12.8 Hz, 17.2 Hz, H-3β), 5.87 (s, 1H, H-8), 3.67 (s, 3H, OCH<sub>3</sub>), 7.21 (2H, d, *J* = 8.4 Hz, H-2', 6'), 6.71 (2H, d, *J* = 8 Hz, H-3', 5'). APT (CD<sub>3</sub>OD, 100 MHz): 79.2 (C-2), 42.7 (C-3), 197.2 (C-4), 155.2 (C-5), 129.0 (C-6), 159.4 (C-7), 94.8 (C-8), 157.6 (C-9), 102.1 (C-10), 59.6 (OCH<sub>3</sub>), 129.7 (C-1'), 127.6 (C-2', 6'), 114.9 (C-3', 5'), 158.8 (C-4').

**Compound 10** (4',5-dihydroxy-3',7,8-trimethoxyflavone) was obtained as yellow powder. <sup>1</sup>H NMR (DMSO- *d*<sub>6</sub>, 400 MHz): 6.99 (1H, s, H-3), 6.59 (1H, s, H-6), 3.92 (3H, s, R<sub>3</sub>), 3.86 (3H, s, R<sub>4</sub>), 7.59 (1H, s, H-2'), 7.00 (1H, br d, *J* = 6.7 Hz, H-5'), 7.60 (1H, d, *J* = 6.0 Hz, H-6'), 3.90 (3H, s, R<sub>5</sub>), 12.97 (5-OH), 10.08 (4'-OH). DEPT Q (DMSO- *d*<sub>6</sub>, 100 MHz): 164.3 (C-2), 103.5 (C-3), 182.7 (C-4), 157.1 (C-5), 96.4 (C-6), 158.8 (C-7), 128.9 (C-8), 151.4 (C-9), 104.3 (C-10), 56.9 (R<sub>3</sub>), 61.6 (R<sub>4</sub>), 121.9 (C-1'), 110.4 (C-2'), 149.2 (C-3'), 148.5 (C-4'), 116.6 (C-5'), 120.8 (C-6'), 56.5 (R<sub>5</sub>).

**Compound 11** (5,7-dihydroxy-3',4',5',8-tetramethoxy flavone) was obtained as yellow substance. <sup>1</sup>H NMR (CDCl<sub>3</sub>, 400 MHz): 6.62 (1H, s, H-3), 6.43 (1H, s, H-6), 4.00 (3H, s, R<sub>4</sub>), 7.13 (2H, s, H-2', 6'), 3.95 (6H, s, R<sub>5</sub>, R<sub>7</sub>), 3.94 (3H, s, R<sub>6</sub>). APT (CDCl<sub>3</sub>, 100 MHz): 163.2 (C-2), 105.4 (C-3), 182.4 (C-4), 155.5 (C-5), 99.0 (C-6), 157.7 (C-7), 126.9 (C-8), 148.9 (C-9), 105.1 (C-10), 61.8 (R<sub>4</sub>), 126.3 (C-1'), 103.7 (C-2', 6'), 153.7 (C-3', 5'), 141.6 (C-4'), 56.3 (R<sub>5</sub>, R<sub>7</sub>), 61.1 (R<sub>6</sub>).

**Compound 12** (1,3-propanediol-2-amino-1-(4'-hydroxy-3'-methoxyphenyl) was obtained as colorless needles. <sup>1</sup>H NMR (CDCl<sub>3</sub>, 400 MHz): 4.74 (d, 1H, *J* = 4 Hz, H-1), 3.10 (m, 1H, H-2), 4.25 (dd, 1H, *J* = 9.2 & 6.4 Hz, H-3a), 3.88 (dd, 1H, *J* = 9.2 Hz, 3.6 Hz, H-3b), 6.90 (d, 1H, *J* = 2 Hz, H-2'), 6.89 (d, 1H, *J* = 7.6 Hz, H-5'), 6.82 (dd, 1H, *J* = 8.2 Hz, 1.6 Hz, H-6'), 3.91 (s, 3H, OCH<sub>3</sub>). APT (CDCl<sub>3</sub>, 100 MHz): 85.9 (C-1), 54.2 (C-2), 71.7 (C-3), 132.9 (C-1'), 108.6 (C-2'), 146.7 (C-3'), 145.3 (C-4'), 114.3 (C-5'), 118.9 (C-6'), 55.9 (OCH<sub>3</sub>).

**Compound 13** (3',5',5,7-tetrahydroxy-6-methoxyflavanone) was obtained as yellow powder. <sup>1</sup>H NMR (CD<sub>3</sub>OD, 400 MHz): 5.16 (1H, dd, *J* = 2.8 Hz, 12.8 Hz, H-2), 2.60 (1H, dd, *J* = 2.8 Hz, 17.2 Hz, H-3 $\alpha$ ), 2.96 (1H, dd, *J* = 12.8 Hz, 17.2 Hz, H-3 $\beta$ ), 5.87 (1H, s, H-8), 3.68 (s, 3H, OCH<sub>3</sub>), 6.68 (2H, s, H-2',4'), 6.81 (1H, s, H-6'). APT (CD<sub>3</sub>OD, 100 MHz): 79.2 (C-2), 42.7 (C-3), 197.2 (C-4), 155.2 (C-5), 129.0 (C-6), 159.5 (C-7), 94.8 (C-8), 158.8 (C-9), 102.1 (C-10), 59.6 (OCH<sub>3</sub>), 130.3 (C-1'), 117.9 (C-2'), 145.1 (C-3'), 114.8 (C-4'), 145.5 (C-5'), 113.3 (C-6').

**Compound 14** (simplexoside (piperitol-O- $\beta$ -D-glucoside)) was obtained as white powder. <sup>1</sup>H NMR (DMSO- *d*<sub>6</sub>, 400 MHz): 6.86- 7.06 (6H, m, aromatic protons), 3.78 (s, 3H, OCH<sub>3</sub>), 6.00 (s, 2H, OCH<sub>2</sub>O), 4.67 (s, 2H, H-7&7'), 3.04 (2H, m, H- 8&8'), 4.14 (2H, t, *J* = 15.6, 7.1, H-9a,9'a), 3.66-3.69 (2H, d, *J* = 11.4, H-9b, 9'b), 4.88 (1H, s, *J* = 6.7 Hz, H-1''), 3.37 (m, protons of sugar). APT (DMSO- *d*<sub>6</sub>, 100 MHz): 135.9 (C-1), 107.1 (C-2), 149.4 (C-3), 147.9 (C-4), 111.0 (C-5), 119.9 (C-6), 101.4 (OCH<sub>2</sub>O), 135.6 (C-1'), 108.5 (C-2'), 146.9 (C-3'), 146.3 (C-4'), 115.6 (C-5'), 118.6 (C-6'), 56.2 (OCH<sub>3</sub>), 85.4 (C-7), 85.3 (C-7'), 54.2 (C-8), 54.1 (C-8'), 71.6 (C-9), 71.5 (C-9'), 100.6 (C-1''), 73.7 (C-2''), 77.3 (C-3''), 70.1 (C-4''), 77.4 (C-5''), 61.1 (C-6'').

**Compound 15** (pinoresinol monomethyl ether- $\beta$ -D-glucoside) was obtained as white powder. <sup>1</sup>H NMR (CD<sub>3</sub>OD, 400 MHz): 6.85 (d, *J* = 2 Hz, 1H, H-2), 6.66 (d, *J* = 8 Hz, 1H, H-5), 6.71 (dd, *J* = 8.2 Hz, 2 Hz, 1H, H-6), 3.76 (s, 6H, R<sub>1,2</sub>), 6.93 (d, *J* = 2 Hz, 1H, H-2'), 7.05 (d, *J* = 8.4 Hz, 1H, H-5'), 6.82 (dd, *J* = 8 Hz, 2 Hz, 1H, H-6'), 3.77 (s, 3H, R<sub>3</sub>), 4.61 (d, *J* = 4 Hz, 1H, H-7), 4.66 (d, *J* = 4 Hz, 1H, H-7'), 3.04 (m, 2H, H-8&8'), 3.53-3.61 (m, 2H, H-9a&9'a), 4.12-4.17 (m, 2H, H-9b&9'b), 4.78 (d, *J* = 7.2 Hz, 1H, H-1''), 3.29-3.41 (m, 4H, H- 2'',3'',4'',5''), 3.53-3.61 (m, 2H, H-6''a, 6''b). APT (CD<sub>3</sub>OD, 100 MHz): 132.3 (C-1), 109.5 (C-2), 147.7 (C-3), 146.1 (C-4), 114.7 (C-5), 118.6 (C-6), 54.9 (R<sub>1&R2</sub>), 136.0 (C-1'), 110.1 (C-2'), 149.5 (C-3'), 145.9 (C-4'), 116.6 (C-5'), 118.4 (C-6'), 55.3 (R<sub>3</sub>), 86.1 (C-7), 85.7 (C-7'), 54.1 (C-8), 53.9 (C-8'), 71.3 (C-9&9'), 101.4 (C-1''), 73.5 (C-2''), 76.4 (C-3''), 69.9 (C-4''), 76.8 (C-5''), 61.1 (C-6'').

**Compound 16** (orientin) was obtained as yellow powder. <sup>1</sup>H NMR (DMSO- *d*<sub>6</sub>, 400 MHz): 6.68 (s, 1H, H-3), 6.29 (s, 1H, H-6), 7.51 (br s, 1H, H-2'), 6.89 (d, *J* = 8.4 Hz, 1H, H-5'), 7.56 (br d, *J* = 8.4 Hz, 1H, H-6'), 4.70 (d, *J* = 9.6 Hz, 1H, H-1''), 3.26- 3.94 (m, 6H, H-2'',3'',4'',5'',6''a,6''b), 13.20 (s, 5-OH). APT (DMSO- *d*<sub>6</sub>, 100 MHz): 164.6 (C-2), 102.9 (C-3), 182.5 (C-4), 160.9 (C-5), 98.7 (C-6), 163.1 (C-7), 105.0 (C-8), 156.5 (C-9), 104.5 (C-10), 122.5 (C-1'), 114.5 (C-2'), 146.3 (C-3'), 150.2 (C-4'), 116.1 (C-5'), 119.9 (C-6'), 73.9 (C-1''), 71.2 (C-2''), 79.2 (C-3''), 71.2 (C-4''), 82.5 (C-5''), 62.1 (C-6'').

**Compound 17** (luteolin-3'-O- $\beta$ -D-glucoside) was obtained as yellow powder. <sup>1</sup>H NMR (CD<sub>3</sub>OD, 400 MHz): 6.52 (s, H-3), 6.12 (s, H-6), 6.36 (s, H-8), 7.35 (br s, H-2'), 7.22 (d, *J* = 8.4 Hz, H-5'), 7.36 (br d, *J* = 9.6 Hz, H-6'), 4.8 (H-1'', masked), 3.3-3.9 (m, H-2'',3'',4'',5'',6''). APT (CD<sub>3</sub>OD, 100 MHz): 164.8 (C-2), 103.7 (C-3), 182.5 (C-4), 161.8 (C-5), 98.8 (C-6), 164.1 (C-7), 93.7 (C-8), 158.0 (C-9), 104.1 (C-10), 125.8 (C-1'), 113.5 (C-2'), 148.6 (C-3'), 147.2 (C-4'), 116.5 (C-5'), 118.4 (C-6'), 101.8 (C-1''), 73.4 (C-2''), 76.1 (C-3''), 69.9 (C-4''), 77.1 (C-5''), 60.1 (C-6'').

**Compound 18** (3,5-dicaffeoylquinic acid (isochlorogenic acid)) was obtained as yellow powder. <sup>1</sup>H NMR (CD<sub>3</sub>OD, 400 MHz): 2.31 (m, H-2eq), 2.08-2.15 (m, H-2ax, 6eq, 6ax), 5.41 (m, H-3), 3.95 (dd, *J*= 9.36, 3.4, H-4), 5.53 (m, H-5), 6.79 (s, H-2'), 6.81 (s, H-2''), 7.09 (d, *J*= 7.8 Hz, H-5', 5''), 6.99 (dd, *J*= 7.5, 2.2 Hz, H-6', 6''), 7.60 (d, *J*=15.9 Hz, H-7'), 7.63 (d, *J*= 15.9 Hz, H-7''), 6.32 (d, *J*= 15.9 Hz, H-8'), 6.42 (d, *J*= 15.9 Hz, H-8''). APT (CD<sub>3</sub>OD, 100 MHz): 74.6 (C-1), 35.9 (C-2), 72.7 (C-3), 71.3 (C-4), 70.9 (C-5), 38.9 (C-6), 170.0 (C-7), 126.6 (C-1'), 126.4 (C-1''), 113.6 (C-2'), 113.7 (C-2''), 145.4 (C-3', 3''), 148.1 (C-4'), 148.0 (C-4''), 115.1 (C-5'), 115.0 (C-5''), 121.6 (C-6'), 121.5 (C-6''), 145.5 (C-7'), 145.4 (C-7''), 114.6 (C-8'), 114.1 (C-8''), 167.4 (C-9'), 167.9 (C-9'').

End of Supplementary material file
